# Supplementary material for: Synthesis of (−)-epibatidine
Source: Royal Society of Chemistry journal article supplement (doi:10.1039/c4ra00770k), 2014-01-01

# Supplementary Information

## Synthesis of (-)-Epibatidine

Wen-Hua Chiou\* and Yu-Min Chiang

[wchiou@dragon.nchu.edu.tw](mailto:wchiou@dragon.nchu.edu.tw)

*Department of Chemistry, National Chung Hsing University, Taichung 402 Taiwan, R.O.C.*

### Table of Contents

|                                                                               |    |
|-------------------------------------------------------------------------------|----|
| General methods and materials                                                 | 2  |
| Procedures to synthesize all compounds.                                       | 3  |
| Crystal data and structure refinement for oxazolidinone <b>4a</b>             | 18 |
| Copies of <sup>1</sup> H-NMR and <sup>13</sup> C-NMR spectra of all compounds | 26 |

**General Methods:** TLC analyses were performed on 0.25 mm silica gel plates, and were visualized with UV light, iodine chamber, 10% sulfuric acid or 10% PMA solution. Melting points were measured by means of open capillaries. All NMR spectra, i.e.,  $^1\text{H}$ ,  $^{13}\text{C}$ , DEPT, DQF-gCOSY, gHSQC, gHMBC, and NOE difference, were recorded on either 600 or 400 MHz NMR spectrometer, which provided all necessary data for the full assignment of each compound. HPLC analyses were carried out on a high-pressure mixing system with two pumps and a photodiodearray detector. The mass analyzer used for the HRMS is double focusing magnetic sector. The specific rotation values were recorded on the wavelength of 589 nm.

**Materials:** Chemicals, reagents and solvents were purchased from commercial suppliers. The reagents were used as received. Dichloromethane, pyridine, triethylamine, acetonitrile, DMSO and methanol were dried and distilled over calcium hydride under argon before use. Ether was dried and distilled over sodium-benzophenone ketyl under argon before use. THF was dried and distilled over potassium metal under argon before use. Toluene and benzene were dried and distilled over sodium metal under argon or argon before use. The reaction flasks were dried in a 110 °C oven and allowed to cool to room temperature in a desiccator over calcium sulfate and assembled under argon atmosphere.

### Separation of oxazolidinone diastereomers:

The racemic acid **3** (413 mg, 1.50 mmol, 1.0 eq.) was dissolved in one part of CH<sub>2</sub>Cl<sub>2</sub> (~ 5 M). To the solution in an ice bath, was added SOCl<sub>2</sub> (3.0 eq.) followed by a drop of DMF under argon. Upon completion of addition, the ice bath was removed and the reaction mixture was allowed to be stirred at room temperature for 16 h. The reaction mixture was concentrated under reduced pressure to remove volatile substances, to yield a crude residue. The crude residue was diluted with one part of CH<sub>2</sub>Cl<sub>2</sub> to give the crude acid chloride solution.

To a THF solution of (4*S*)-benzyl-2-oxazolidinone (319 mg, 1.80 mmol, 1.2 eq., ~ 0.3 M) at -50 °C under argon, BuLi (1.2 mL, 1.3 eq., 1.6 M in hexane) was slowly added by an additional funnel. The reaction mixture was allowed to be stirred at -50 °C for 1 h. The acid chloride solution was slowly cannulated to the oxazolidinone solution. The addition rate of the acid chloride solution was controlled so that the internal temperature was in the range between -40 to -50 °C. The resulting reaction mixture was allowed to be stirred at the temperature for 6 h. Upon completion of the reaction monitored by TLC analysis, chilled saturated NH<sub>4</sub>Cl solution was added to quench the reaction, and the reaction mixture was concentrated under reduced pressure to remove excess organic solvent to yield a residue. The residue was partitioned with CH<sub>2</sub>Cl<sub>2</sub> and water. The resulting aqueous layer was extracted with CH<sub>2</sub>Cl<sub>2</sub> (X5). The combined organic layers were washed dried over anhydrous Na<sub>2</sub>SO<sub>4</sub>, and then concentrated to give crude product. Purification of the crude product by flash chromatography on silica gel, using EtOAc/n-Hex as the eluant afforded the titled product.

### 3-[(1*R*,2*S*,4*S*)-7-benzyloxycarbonyl-7-azabicyclo[2.2.1]heptane-2-carbonyl]-(4*S*)-benzyl-2-

**oxazolidinone (4a):** 290 mg, 0.667 mmol, 44%; white solid, mp 167-168 °C;  $R_f$  = 0.37, EtOAc/n-Hex = 1/2;  $[\alpha]_D^{25} +25.6$  ( $c$ : 1.0, CHCl<sub>3</sub>); <sup>1</sup>H-NMR (400 MHz, 25 °C, CDCl<sub>3</sub>,  $\delta$ ): 1.47 (t,  $J$  = 7.2 Hz, 1H), 1.58-1.74 (m, 2H), 1.76-1.89 (m, 2H), 2.49 (ddd,  $J$  = 5.2, 5.2 and 10.4 Hz, 1H), 2.56-2.82 (m, 1H), 3.10-3.34 (m, 1H), 3.65 (dd,  $J$  = 5.2 and 8.4 Hz, 1H), 3.70 (brs, 0.5H), 3.97 (brs, 0.5H), 4.08-4.20 (m, 1H), 4.25 (brs, 0.5H), 4.38-4.45 (m, 2H), 4.63-4.68 (m, 0.5H), 4.94-5.15 (m, 2H), 7.06-7.40 (m, 10H); <sup>13</sup>C-NMR (100 MHz, 25 °C, CDCl<sub>3</sub>,  $\delta$ ): 28.9 (t), 29.6 (t), 31.8 (t), 37.6 (t), 47.7 (d), 55.4 (d), 56.3 (d), 60.2 (d), 66.2 (t), 66.8 (t), 127.2<sup>#1</sup> (d), 127.9<sup>#</sup> (d),

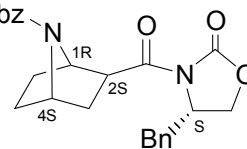

<sup>1</sup> #: These methine peaks in two phenyl groups can not be quantified by either peak heights or integral values due to deformation and overlapping.

128.36<sup>#</sup> (d), 128.38<sup>#</sup> (d), 128.8<sup>#</sup> (d), 129.3<sup>#</sup> (d), 135.2 (s), 136.5 (s), 153.5 (s), 155.1 (s), 172.2 (s); EI-HRMS (m/z): [M]<sup>+</sup> calcd for C<sub>25</sub>H<sub>26</sub>N<sub>2</sub>O<sub>5</sub><sup>+</sup>, 434.1842; found, 434.1832 (Δ= 2.3 ppm).

**3-[(1*S*,2*R*,4*R*)-7-benzyloxycarbonyl-7-azabicyclo[2.2.1]heptane-2-carbonyl]-(4*S*)-benzyl-2-**

**oxazolidinone (4b):** 270 mg, 0.621 mmol, 41%; white solid, mp 110-111 °C; *R<sub>f</sub>* = 0.29; EtOAc/*n*-Hex = 1/2; [α]<sub>D</sub><sup>25</sup> +83.5 (*c*: 1.0, CHCl<sub>3</sub>); <sup>1</sup>H-NMR (400 MHz, 25 °C, CDCl<sub>3</sub>, δ): 1.43-1.50 (m, 1H), 1.57 (t, *J* = 9.6 Hz, 1H), 1.72 (t, *J* = 8.4 Hz, 1H), 1.81-1.94 (m, 2H), 2.50 (brs, 1.5H), 2.78 (brs, 0.5H), 3.08 (brs, 0.5H), 3.30 (brs, 0.5H), 3.58 (dd, *J* = 5.2, and 8.4 Hz, 1H), 4.18 (brs, 2H), 4.44 (brs, 1H), 4.60 (brs, 2H), 4.84-5.24 (m, 2H), 7.00-7.60 (m, 10H); <sup>13</sup>C-NMR (100 MHz, 25 °C, CDCl<sub>3</sub>, δ): 28.7\* (t), 29.5\* (t), 31.8 (t), 37.5 (t), 47.5 (d), 55.3 (d), 56.1 (d), 60.1 (d), 66.3 (t), 66.8 (t), 127.1 (d), 127.8 (d, 2C), 128.3 (d, 2C), 128.8 (d, 3C), 129.4 (d, 2C), 135.3 (s), 136.5 (s), 153.5 (s), 154.9 (s), 172.2 (s); EI-HRMS (m/z): [M]<sup>+</sup> calcd for C<sub>25</sub>H<sub>26</sub>N<sub>2</sub>O<sub>5</sub><sup>+</sup>, 434.1842; found, 434.1834 (Δ= 1.8 ppm).

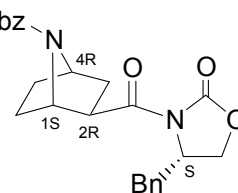

**Hydrolysis of the oxazolidinone derivatives:**

To a THF solution (2.5 mL) of oxazolidinone **4** (0.44 mmol, 1.0 eq.) in an ice bath, LiOH·H<sub>2</sub>O (29.6 mg, 0.70 mmol, 1.6 eq.) was added followed by H<sub>2</sub>O<sub>2</sub> (35%, 180 μL, 2 mmol, 4 eq.). The reaction mixture was allowed to be stirred at room temperature for 2 h. Upon completion of the reaction monitored by TLC analysis, a Na<sub>2</sub>SO<sub>3</sub> solution (0.2 g dissolved in 1.5 mL) was added to quench the reaction, and the reaction mixture was concentrated under reduced pressure to remove excess organic solvent. H<sub>2</sub>O (2 mL) was added to the aqueous solution. The resulting aqueous solution was washed with CH<sub>2</sub>Cl<sub>2</sub> (2 mL X5), and covered with EtOAc (10 mL). The bilayer solution was acidified with a HCl solution (3 N) until pH was around 2. White precipitate was observed during acidification. After separation of the organic layer, the resulting aqueous layer was extracted with EtOAc (10 mL X 5). The combined organic layers were washed with brine (10 mL), and dried over anhydrous Na<sub>2</sub>SO<sub>4</sub>, and then concentrated to give the crude acid. Purification of the crude acid product by flash chromatography on silica gel, using EtOAc/*n*-Hex/AcOH as the eluant, gave the titled product as a colorless oil.

HPLC condition: CHIRACEL OD-H, 4.6 mm X 250 mm, 5 μm; Mobile phase A: 0.5% TFA in an IPA/*n*-Hex solution (v/v = 1/10); Mobile phase B: 0.5% TFA in pure *n*-Hex; isocratic, 50% A :50% B; flow rate 1.0 mL per min; detection UV 215 nm, *t<sub>R</sub>*: 18.4 min for (+)-**3**, 26.3 min for (–)-**3**.

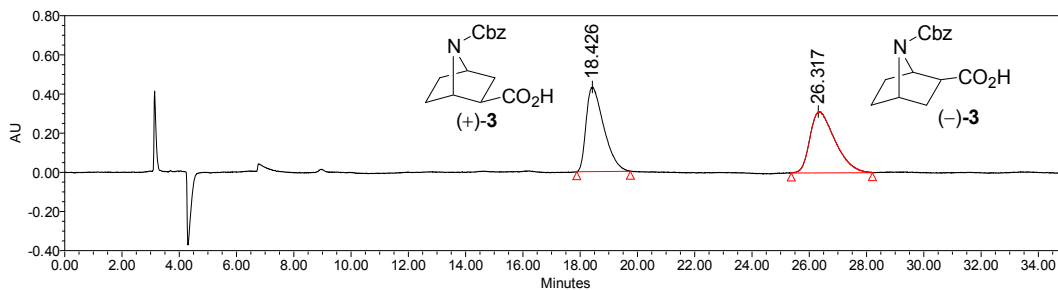

|   | Retention Time | Area     | % Area | Height |
|---|----------------|----------|--------|--------|
| 1 | 18.426         | 18454909 | 49.31  | 432817 |
| 2 | 26.317         | 18972776 | 50.69  | 313734 |

**(-)-(1*R*,2*S*,4*S*)-7-benzyloxycarbonyl-7-azabicyclo[2.2.1]heptane-2-carboxylic acid (-)-3:** 98%; colorless oil,  $R_f = 0.24$ ; EtOAc/n-Hex = 1/4;  $[\alpha]_D^{25} -8.6$  ( $c: 1.0, \text{CHCl}_3$ );  $t_R: 26.5$  min for (-)-3.

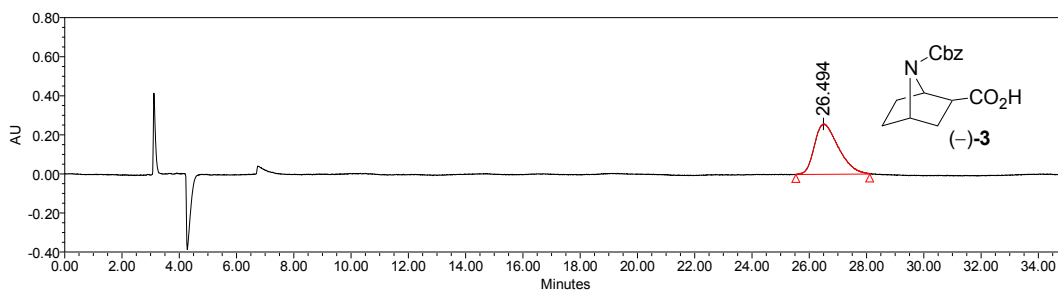

**(+)-(1*S*,2*R*,4*R*)-7-benzyloxycarbonyl-7-azabicyclo[2.2.1]heptane-2-carboxylic acid (+)-3:** 93%; colorless oil,  $R_f = 0.24$ ; EtOAc/n-Hex = 1/4;  $[\alpha]_D^{25} +8.8$  ( $c: 1.0, \text{CHCl}_3$ );  $t_R: 18.4$  min for (+)-3.

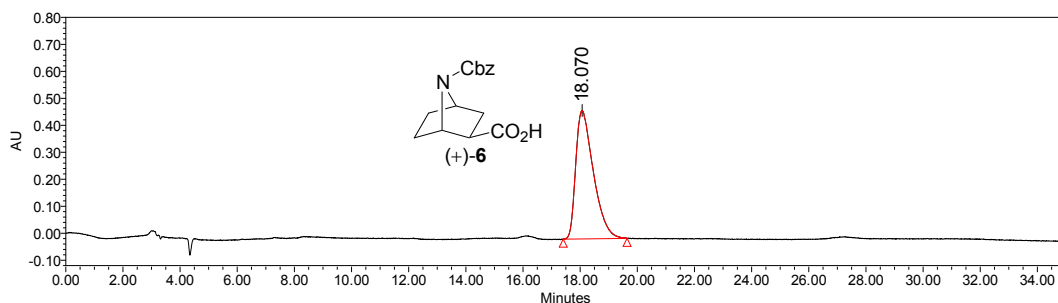

**(-)-(1R,2S,4S)-7-benzyloxycarbonyl-7-azabicyclo[2.2.1]heptane-2-methanol**

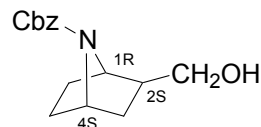

**(5):** To a solution of the acid **3** (9.16 g, 33.3 mmol, 1.0 eq.) in THF (80 mL) in an ice bath, was slowly added  $\text{BH}_3 \cdot \text{SMe}_2$  solution (2 M, in THF, 35 mL, 69.9 mmol, 2.1 eq.). The reaction mixture was allowed to be stirred at room temperature for 5 h. Upon completion of the reaction monitored by TLC analysis, chilled water (48 mL) was added to quench the reaction, and the reaction mixture was concentrated under reduced pressure to remove excess organic solvent. The aqueous solution was partitioned with EtOAc (40 mL) and water (80 mL). The resulting aqueous layer was extracted with EtOAc (20 mL X5). The combined organic layers were washed with saturated  $\text{NaHCO}_3$  (15 mL), brine (30 mL), and dried over anhydrous  $\text{Na}_2\text{SO}_4$ . After removal of the solid dehydrating agent, the organic layer was concentrated under reduced pressure to give a crude product. Purification of the crude product by flash chromatography on silica gel, using EtOAc/n-Hex as the eluant, gave the titled product as a colorless oil (8.35 g, 32.0 mmol, 96%):  $R_f = 0.36$ , EtOAc/n-Hex = 4/1;  $[\alpha]_D^{24} -19.4$  ( $c$ : 1.0,  $\text{CHCl}_3$ );  $^1\text{H-NMR}$  (400 MHz, 25 °C,  $\text{CDCl}_3$ ,  $\delta$ ): 1.14-1.22 (m, 1H, H-3 exo), 1.30-1.42 (m, 2H, H-5 and H-6), 1.45 (dd,  $J = 8.4$  and 12.4 Hz, 1H, H-3 endo), 1.70 (br, 2H, H-5 and H-6), 1.84-1.91 (m, 1H, H-2), 3.19-3.29 (m, 2H,  $\text{CH}_2\text{OH}$ ), 3.80-4.10 (br, 1H,  $\text{CH}_2\text{OH}$ ), 4.24 (brs, 2H, H-1 and H-4), 5.04 (brs, 2H,  $-\text{OCH}_2\text{Ph}$ ), 7.21-7.28 (m, 1H, H-4' in Ph), 7.27-7.31 (m, 4H, H-2' and H-3' in Ph);  $^{13}\text{C-NMR}$  (100 MHz, 25 °C,  $\text{CDCl}_3$ ,  $\delta$ ): 28.7 (t, 2C, C-5 and C-6), 32.9 (t, C-3), 45.1 (d, C-2), 55.4 (d, C-4), 57.1 (d, C-1), 64.1 (t,  $\text{CH}_2\text{OH}$ ), 66.2 (t,  $\text{OCH}_2\text{Ph}$ ), 127.2 (d, C-2 in Ph), 127.4 (d, C-4 in Ph), 127.9 (d, C-3 in Ph), 136.2 (s, C-1 in Ph), 155.2 (s, N-CO-O). EI-HRMS ( $m/z$ ):  $[\text{M}]^+$  calcd for  $\text{C}_{15}\text{H}_{19}\text{NO}_3^+$ , 261.1365; found, 261.1368 ( $\Delta = 1.1$  ppm).

HPLC condition: Chiralcel OD-H, 250 mm X 4.6 mm, 5  $\mu\text{m}$ ; Mobile phase A: IPA : n-Hex = 1 : 15 (v/v); Mobile phase B: pure n-Hex; isocratic, 50% A : 50% B; flow rate 1.0 mL per min; detection UV 215 nm,  $t_R$ : 25.9 min for (+)-**5**, 28.5 min for (-)-**5**.

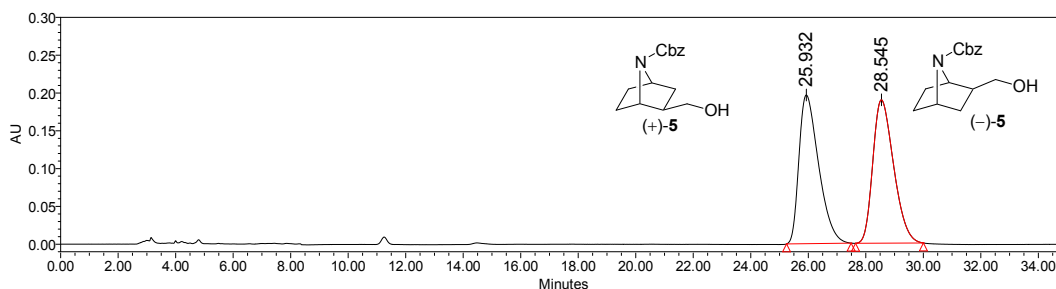

|   | Retention Time | Area    | % Area | Height |
|---|----------------|---------|--------|--------|
| 1 | 25.932         | 9340012 | 49.52  | 196658 |
| 2 | 28.545         | 9521818 | 50.48  | 189645 |

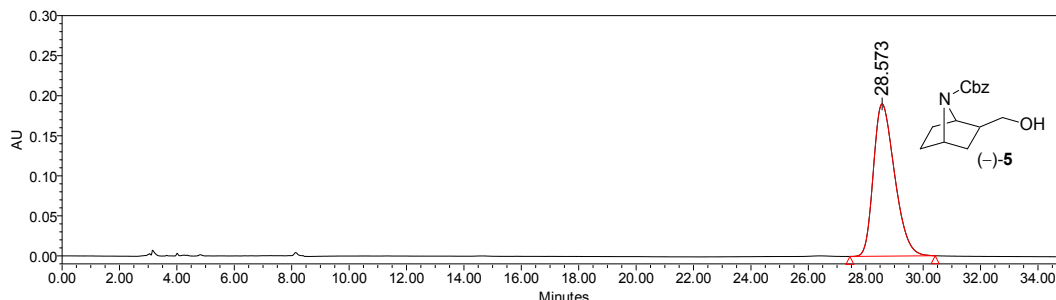

**(+)-(1*R*,2*S*,4*S*)-7-benzoyloxycarbonyl-7-azabicyclo[2.2.1]heptane-2-carbaldehyde**

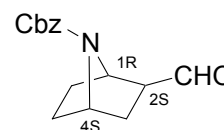

**(6):** To a solution of alcohol **5** (5.52 g, 21.1 mmol, 1.0 eq.) in CH<sub>2</sub>Cl<sub>2</sub> (150 mL) in an ice bath, was slowly added Dess-Martin periodinane reagent (10.75 g, 25.34 mmol, 1.2 eq.) in ~3 g portions. The reaction mixture was allowed to be stirred at room temperature for 3 h. Upon completion of the reaction monitored by TLC analysis, chilled saturated NaHCO<sub>3</sub> (245 mL) was added, followed by filtration with a celite pad to yield a filtrate. After separation of the organic layer, the resulting aqueous layer was extracted with CH<sub>2</sub>Cl<sub>2</sub> (50 mL X5). The combined organic layers were dried over anhydrous Na<sub>2</sub>SO<sub>4</sub>. After removal of the solid dehydrating agent, the organic layers was concentrated under reduced pressure to give a crude product. Purification of the crude product by flash chromatography on silica gel, using EtOAc/n-Hex as the eluant, gave the titled product as a colorless oil (5.10 g, 19.7 mmol, 93%): *R<sub>f</sub>* = 0.28, EtOAc/n-Hex = 1/2; [α]<sub>D</sub><sup>23</sup> +11.5 (*c*: 1.0, CHCl<sub>3</sub>); <sup>1</sup>H-NMR (400 MHz, 25 °C, CDCl<sub>3</sub>, δ): 1.34-1.50 (m, 3H, H-3, H-5 and H-6), 1.64-1.82 (m, 2H, H-5 and H-6), 2.08-2.16 (m, 1H, H-3), 2.44 (dd, *J* = 4.4 and 7.6 Hz, 1H, H-2), 4.30 (brs, 1H, H-4), 4.52 (brs, 1H, H-1), 4.92-5.05 (m, 2H, -OCH<sub>2</sub>Ph), 7.20-7.29 (m, 5H, -Ph), 9.50 (s, 1H, -CHO); <sup>13</sup>C-NMR (100 MHz, 25 °C, CDCl<sub>3</sub>, δ): 28.9 (t, 2C, C-5 and C-6), 29.8 (t, C-3), 54.5 (d, C-2), 55.8 (d, C-4), 55.6 (d, C-1), 66.5 (t, OCH<sub>2</sub>Ph), 127.5 (d, C-2 in Ph), 127.6 (d, C-4 in Ph), 128.0 (d, C-3 in Ph), 136.0 (s, C-1 in Ph), 154.7 (s, N-CO-O), 200.3 (d, CHO); EI-HRMS (*m/z*): [M]<sup>+</sup> calcd for C<sub>15</sub>H<sub>17</sub>NO<sub>3</sub><sup>+</sup>, 259.1208; found, 259.1201 (Δ = 2.7 ppm).

**2-[(1R,2S,4S)-7-benzyloxycarbonyl-7-azabicyclo[2.2.1]heptan-2-yl]-**

**methoxyethene (7):** To a solution of methoxymethyltriphenylphosphonium chloride ( $\text{Ph}_3\text{PCH}_2\text{OCH}_3\cdot\text{Cl}$ , 4.49 g, 13.1 mmol, 2.0 eq.) in THF (60 mL) at  $-50$

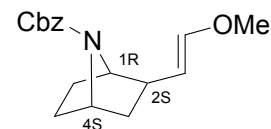

$^{\circ}\text{C}$ , was slowly added NaHMDS solution (2.0 M in THF, 6.5 mL, 13.1 mmol, 2.0 eq.). After stirred at  $-50$   $^{\circ}\text{C}$  for 30 min, the yellow solution became an orange solution. To the ylide solution at  $-50$   $^{\circ}\text{C}$ , was slowly added an aldehyde **6** (1.700 g, 6.556 mmol, 1.0 eq.) solution in THF (20 mL). The reaction mixture was allowed to be stirred at room temperature for 4 h. Upon completion of the reaction monitored by TLC analysis, the solution was concentrated under reduced pressure to a crude residue. The crude residue was partitioned with ether (75 mL) and water (75 mL). After separation of the organic layer, the resulting aqueous layer was extracted with ether (20 mL X5). The combined organic layers were dried over anhydrous  $\text{Na}_2\text{SO}_4$ , and then concentrated under reduced pressure to give a crude product. Purification of the crude product by flash chromatography on silica gel, using EtOAc/n-Hex as the eluant, gave the titled product as a colorless oil (1.658 g, 5.769 mmol, 88%):  $R_f = 0.59$ , EtOAc/n-Hex = 1/2;  $^1\text{H-NMR}$  (400 MHz, 25  $^{\circ}\text{C}$ ,  $\text{CDCl}_3$ ,  $\delta$ ): 1.28-1.50 (m, 3H), 1.62-1.78 (m, 3H), 2.17-2.23 (m, 0.6H), 2.70-2.76 (m, 0.4H), 3.35 (brs, 1.8H), 3.50 (s, 1.2H), 4.01 (d,  $J = 16$  Hz, 1H), 4.18-4.34 (m, 1.5H), 4.59 (t,  $J = 9.6$  Hz, 0.5H), 5.02-5.14 (m, 2H), 5.70 (d,  $J = 6.0$  Hz, 0.4H), 6.27 (d,  $J = 12.8$  Hz, 0.6H), 7.20-7.44 (m, 5H);  $^{13}\text{C-NMR}$  (100 MHz, 25  $^{\circ}\text{C}$ ,  $\text{CDCl}_3$ ,  $\delta$ ): 28.7 (t, 4C), 37.8 (t), 40.0 (t), 41.9 (d, 2C), 55.2 (q), 55.7 (d), 55.8 (d), 59.1 (q), 61.5 (d), 62.0 (d), 66.17 (t), 66.21 (t), 106.6 (d), 110.7 (d), 127.44 (d, 2C), 127.46 (d, 2C), 127.51 (d), 127.56 (d), 128.04 (d, 2C), 128.09 (d, 2C), 136.6 (s, 2C), 144.7 (d), 146.2 (d), 155.2 (s, 2C); EI-HRMS ( $m/z$ ):  $[\text{M}]^+$  calcd for  $\text{C}_{17}\text{H}_{21}\text{NO}_3^+$ , 287.1521; found, 287.1511 ( $\Delta = 3.5$  ppm).

**(-)-(1R,2S,4S)-7-benzyloxycarbonyl-7-azabicyclo[2.2.1]heptan-2-**

**ylacetaldehyde (8):** To a solution of enol ether **7** (4.61 g, 16.0 mmol, 1.0 eq.) in THF (70 mL) in an ice bath, was slowly added HCl solution (1 M in THF, 16 mL).

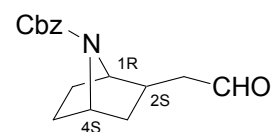

The reaction mixture was allowed to be stirred at room temperature for 2 h. Upon completion of the reaction monitored by TLC analysis, the reaction mixture was concentrated under reduced pressure to afford a residue. The crude residue was partitioned with EtOAc (40 mL) and water (40 mL). After separation of the organic layer, the resulting aqueous layer was extracted with EtOAc (15 mL X5). The combined organic layers were washed with saturated  $\text{NaHCO}_3$  (55 mL), brine (15 mL), and dried over



anhydrous Na<sub>2</sub>SO<sub>4</sub>. After removal of the solid dehydrating agent, the organic layer was concentrated under reduced pressure to give a crude product. Purification of the crude product by flash chromatography on silica gel, using EtOAc/n-Hex as the eluant, gave the titled product as a colorless oil (4.02 g, 14.7 mmol, 92%): colorless oil, *R<sub>f</sub>* = 0.33; EtOAc/n-Hex = 1/2; [α]<sub>D</sub><sup>25</sup> -1.8 (*c*: 1.0, CHCl<sub>3</sub>); <sup>1</sup>H-NMR (400 MHz, 25 °C, CDCl<sub>3</sub>, δ): 1.16-1.23 (m, 1H, H-3), 1.30 (t, *J* = 8.8 Hz, 1H, H-5), 1.40 (t, *J* = 8.8 Hz, 1H, H-6), 1.55-1.75 (m, 3H, H-3, H-5 and H-6), 2.04-2.11 (m, 1H, H-2), 2.19-2.26 (m, 1H, -CH<sub>2</sub>CHO), 2.45 (br, 1H, -CH<sub>2</sub>CHO), 3.94 (brs, 1H, H-1), 4.21 (brs, 1H, H-4), 4.99 (d, *J* = 12.4 Hz, 1H, -OCH<sub>2</sub>Ph), 5.03 (d, *J* = 12.4 Hz, 1H, -OCH<sub>2</sub>Ph), 7.18-7.24 (m, 1H, H-4 in Ph), 7.23-7.28 (m, 4H, H-2' and H-3' in Ph), 9.56 (s, 1H, -CHO); <sup>13</sup>C-NMR (100 MHz, 25 °C, CDCl<sub>3</sub>, δ): 28.6 (t, C-5), 28.7 (t, C-6), 36.4 (d, C-2), 37.2 (t, C-3), 49.4 (t, -CH<sub>2</sub>CHO), 55.8 (d, C-4), 59.8 (d, C-1), 66.3 (t, OCH<sub>2</sub>Ph), 127.5 (d, C-2 in Ph), 127.6 (d, C-4 in Ph), 128.1 (d, C-3 in Ph), 136.3 (s, C-1 in Ph), 155.2 (s, N-CO-O), 201.0 (d, -CH<sub>2</sub>CHO); EI-HRMS (*m/z*): [M]<sup>+</sup> calcd for C<sub>16</sub>H<sub>19</sub>NO<sub>3</sub><sup>+</sup>, 273.1365; found, 273.1361 (Δ = 1.5 ppm).

**(-)-(1*R*,2*S*,4*S*)-7-benzyloxycarbonyl-7-azabicyclo[2.2.1]heptan-2-ylacetic acid (9):**

To a solution of aldehyde **8** (171 mg, 0.626 mmol, 1.0 eq.) in acetone (1.3 mL) in an ice bath, was slowly added Jones' reagent (1.34 M, 600 μL, 0.8 mmol, 1.3 eq.). The reaction mixture was allowed to be stirred at the ice bath for 1 h. Upon completion of the reaction monitored by TLC analysis, IPA (1 mL) was added to quench the reaction, followed by addition of brine (2.0 mL) and CH<sub>2</sub>Cl<sub>2</sub> (4 mL). The resulting aqueous solution was extracted with CH<sub>2</sub>Cl<sub>2</sub> (2 mL X4). The combined organic layers were dried over anhydrous Na<sub>2</sub>SO<sub>4</sub>. After removal of the solid dehydrating agent, the organic layer was concentrated under reduced pressure to give a crude product. Purification of the crude product by flash chromatography on silica gel, using EtOAc/n-Hex/AcOH as the eluant, gave the titled product as a colorless oil (172 mg, 0.594 mmol, 95%): *R<sub>f</sub>* = 0.23; EtOAc/n-Hex = 1/1; [α]<sub>D</sub><sup>26</sup> -5.9 (*c*: 1.0, CHCl<sub>3</sub>); <sup>1</sup>H-NMR (400 MHz, 25 °C, CDCl<sub>3</sub>, δ): 1.32-1.42 (m, 2H, H-3 and H-5), 1.46 (t, *J* = 8.8 Hz, 1H, H-6), 1.62-1.82 (m, 3H, H-3, H-5 and H-6), 2.04-2.11 (m, 1H, H-2), 2.09-2.24 (m, 1H, -CH<sub>2</sub>COOH), 2.40 (br, 1H, -CH<sub>2</sub>COOH), 4.12 (brs, 1H, H-1), 4.30 (brs, 1H, H-4), 5.09 (s, 2H, -OCH<sub>2</sub>Ph), 7.24-7.35 (m, 5H in Ph), 8.60 (brs, 1H, -COOH); <sup>13</sup>C-NMR (100 MHz, 25 °C, CDCl<sub>3</sub>, δ): 28.8 (t, 2C, C-5 and C-6), 37.1 (t, C-3), 38.9 (d, C-2), 39.4 (t, -CH<sub>2</sub>COOH), 56.1 (d, C-4), 60.0 (d, C-1), 66.8 (t, OCH<sub>2</sub>Ph), 127.7 (d, C-2 in Ph), 127.8 (d, C-4 in Ph), 128.3 (d, C-3 in Ph), 136.4 (s,

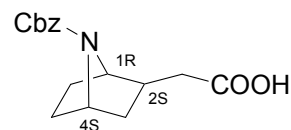

C-1 in Ph), 155.6 (s, N-CO-O), 177.3 (s, -CH<sub>2</sub>COOH); EI-HRMS (m/z): [M]<sup>+</sup> calcd for C<sub>16</sub>H<sub>19</sub>NO<sub>4</sub><sup>+</sup>, 289.1314; found, 289.1305 (Δ = 3.1 ppm).

HPLC condition: Chiralcel OD-H, 250 mm X 4.6 mm, 5 μm; Mobile phase A: 0.5% TFA in an IPA/n-Hex solution (v/v = 1/10); Mobile phase B: 0.5% TFA in pure n-Hex; isocratic, 70% A : 30% B; flow rate 1.0 mL per min; detection UV 215 nm, t<sub>R</sub>: 12.4 min for (+)-**9**, 14.6 min for (-)-**9**.

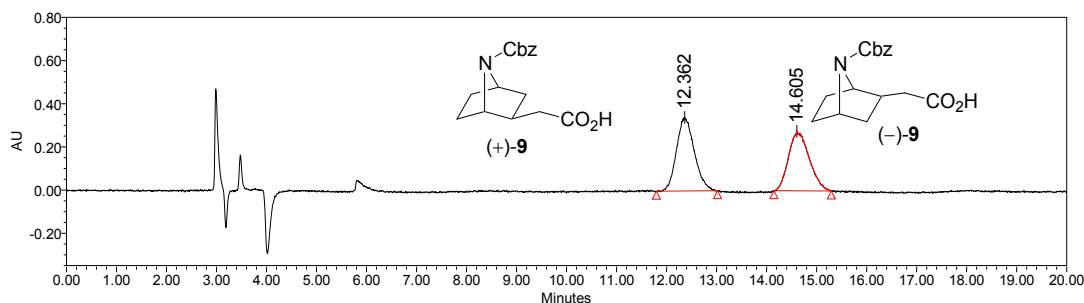

|   | Retention Time | Area    | % Area | Height |
|---|----------------|---------|--------|--------|
| 1 | 12.362         | 8556779 | 50.53  | 342164 |
| 2 | 14.605         | 8378835 | 49.47  | 282511 |

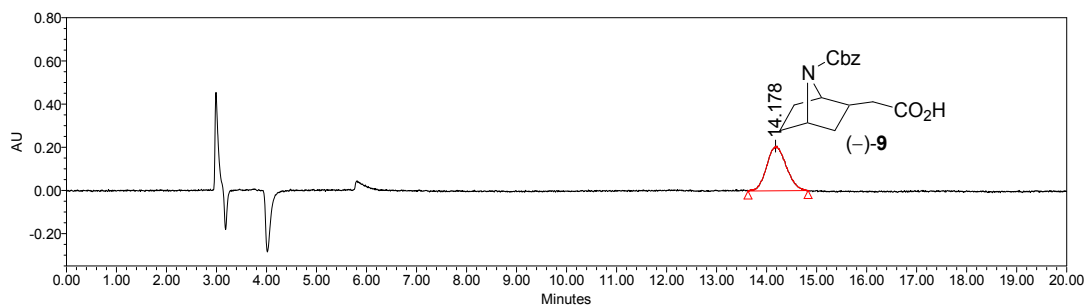

**Ethyl 4-[(1'R,2'S,4'S)-7-benzyloxycarbonyl-7-azabicyclo[2.2.1]heptan-2-yl]-**

**5-oxo-pentanoate(10):** To a solution of aldehyde **9** (3.00 g, 11.0 mmol, 1.0 eq.) in CH<sub>3</sub>CN (7.3 mL) in an ice bath, was slowly added

diethyltrimethylsilylamine (TMSNEt<sub>2</sub>, 2.1 mL, 11.0 mmol, 1.0 eq.) and ethyl acrylate (1.8 mL, 16.5 mmol, 1.5 eq.). The reaction mixture was allowed to be refluxed for 13 h. Upon completion of the reaction monitored by TLC analysis, the reaction mixture was concentrated under reduced pressure to yield a residue. Purification of the crude residue product by flash chromatography on silica gel, using EtOAc/n-Hex as the eluant, gave the titled product glutarate semialdehyde **10** as a colorless oil (3.32 g,

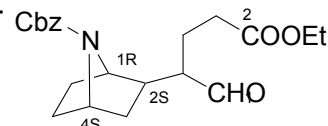

8.89 mmol, 81%):  $R_f$  = 0.23; EtOAc/n-Hex = 1/3;  $^1\text{H-NMR}$  (400 MHz, 25 °C,  $\text{CDCl}_3$ ,  $\delta$ ): 1.13 (t,  $J$  = 7.2 Hz, 3H), 1.26-1.42 (m, 2.5H), 1.42-1.57 (m, 1.5H), 1.58-1.76 (m, 3H), 1.78-1.90 (m, 2H), 2.00-2.24 (m, 3H), 4.00 (dd,  $J$  = 7.2, 14.4 Hz, 2H), 4.03-4.10 (m, 0.5H), 4.21 (br, 1.5H), 4.94-5.04 (m, 2H), 7.17-7.20 (m, 1H), 7.21-7.27 (m, 4H), 9.44 (s, 0.5H), 9.54 (brs, 0.5H);  $^{13}\text{C-NMR}$  (100 MHz, 25 °C,  $\text{CDCl}_3$ ,  $\delta$ ): 13.8 (q, 2C), 21.4 (t), 22.2 (t), 28.6-29.3 (t, 4C), 30.9 (t), 31.0 (t), 34.9 (t, 2C), 42.8 (d, 2C), 54.4 (d), 54.8 (d), 55.7 (d), 56.0 (d), 57.7 (d), 58.1 (d), 60.11 (t), 60.14 (t), 66.36 (t), 60.39 (t), 127.52 (d, 2C), 127.55 (d, 2C), 127.65 (d), 127.66 (d), 128.09 (d, 2C), 128.11 (d, 2C), 136.27 (s), 136.28 (s), 150 (s, 2C), 172.26 (s), 172.31 (s), 203.0 (d), 203.4 (d); ESI-HRMS ( $m/z$ ):  $[\text{M}+\text{H}]^+$  calcd for  $[\text{C}_{21}\text{H}_{27}\text{NO}_5\cdot\text{H}]^+$ , 374.1967; found, 374.1969 ( $\Delta$  = 0.5 ppm).

**(-)-5-[(1'R,2'S,4'S)-7-benzyloxycarbonyl-7-azabicyclo[2.2.1]heptan-2-yl]-**

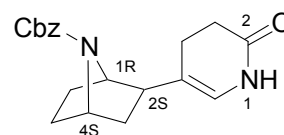

**3,4-dihydropyrid-2-one (11):** To a solution of glutarate semialdehyde **10** (350 mg, 0.937 mmol, 1.0 eq.) in benzene (1.0 mL) in an ice bath, was slowly added

ammonium acetate (87 mg, 1.13 mmol, 1.2 eq.) and acetic acid (80  $\mu\text{L}$ , 1.40 mmol, 1.5 eq). The reaction mixture was allowed to be refluxed for 2.5 h. Upon completion of the reaction monitored by TLC analysis, a  $\text{NaHCO}_3$  solution (5%, 4 mL) was added to quench the reaction at the ice bath, followed by addition of brine (5 mL) and ether (5 mL). The resulting aqueous solution was extracted with ether (3 mL X5). The combined organic layers were washed with brine (5 mL), dried over anhydrous  $\text{Na}_2\text{SO}_4$ , and then concentrated under reduced pressure to give a crude product. Purification of the crude product by flash chromatography on silica gel, using  $\text{MeOH}/\text{CH}_2\text{Cl}_2$  as the eluant, gave the titled product as a white solid (287 mg, 0.879 mmol, 93%): mp 127-128 °C,  $R_f$  = 0.33;  $\text{MeOH}/\text{CH}_2\text{Cl}_2$  = 1/10;  $[\alpha]_{\text{D}}^{25}$   $-1.3^\circ$  ( $c$ : 1.0,  $\text{CHCl}_3$ );  $^1\text{H-NMR}$  (400 MHz, 25 °C,  $\text{CDCl}_3$ ,  $\delta$ ): 1.36-1.46 (m, 2H, H-5 and H-6), 1.58-1.66 (m, 2H, H-3), 1.72 (brs, 2H, H-5 and H-6), 2.18 (brs, 2H, H-4 in pyridone), 2.27 (t,  $J$  = 6.8 Hz, 1H, H-2), 2.28-2.38 (m, 2H, H-3 in pyridone), 4.04-4.20 (m, 1H, H-1), 4.32 (brs, 1H, H-4), 4.98-5.08 (m, 2H,  $-\text{OCH}_2\text{Ph}$ ), 5.78 (brs, 1H, H-6 in pyridone), 7.22-7.34 (m, 5H, -Ph), 7.93 (s, 1H, -NH);  $^{13}\text{C-NMR}$  (100 MHz, 25 °C,  $\text{CDCl}_3$ ,  $\delta$ ): 22.5 (t, C-4 in pyridone), 28.9 (t, 2C, C-5 and C-6), 30.1 (t, C-3 in pyridone), 35.9 (t, C-3), 46.2 (d, C-2), 55.6 (d, C-4), 59.5 (d, C-1), 66.5 (t,  $\text{OCH}_2\text{Ph}$ ), 119.4 (d, C-6 in pyridone), 119.7 (s, C-5 in pyridone), 127.8 (d, C-2 in Ph), 127.9 (d, C-4 in Ph), 128.3 (d, C-3 in Ph), 136.5 (s, C-1 in Ph), 154.6 (s,  $\text{N-CO-O}$ ), 171.1 (s, C-2 in pyridone); EI-HRMS ( $m/z$ ):  $[\text{M}]^+$  calcd for  $\text{C}_{19}\text{H}_{22}\text{N}_2\text{O}_3^+$ , 326.1630; found, 326.1631 ( $\Delta$  = 0.3 ppm).

HPLC condition: Chiralcel OD-H, 250 mm X 4.6 mm, 5  $\mu$ m; Mobile phase A: IPA : n-Hex = 1 : 4 (v/v); Mobile phase B: pure n-Hex; isocratic, 70% A : 30% B; flow rate 1.0 mL per min; detection UV 258 nm,  $t_R$ : 23.5 min for (+)-**11**, 27.4 min for (-)-**11**.

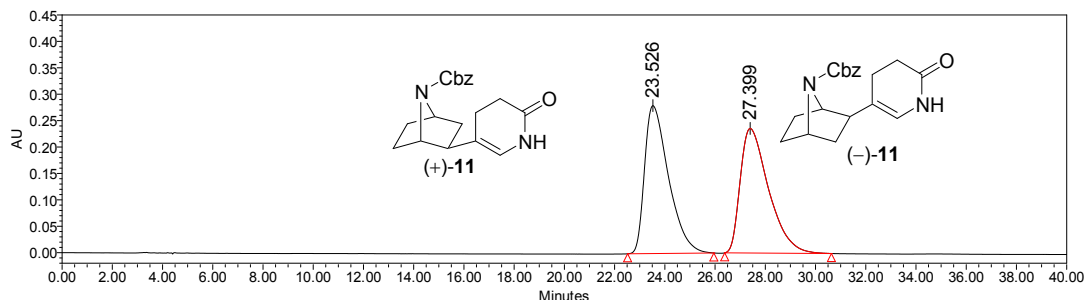

|   | Retention Time | Area     | % Area | Height |
|---|----------------|----------|--------|--------|
| 1 | 23.526         | 18534751 | 50.10  | 280066 |
| 2 | 27.399         | 18460616 | 49.90  | 235872 |

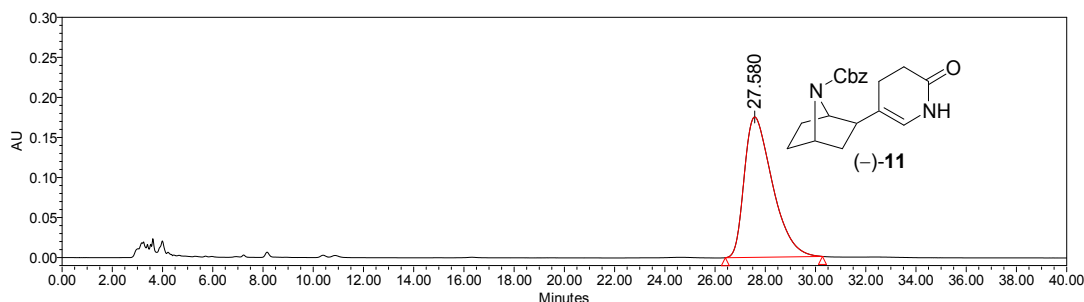

**(+)-5-[(1'R,2'S,4'S)-7-benzyloxycarbonyl-7-azabicyclo[2.2.1]heptan-2-yl]-2-pyridine (12):**

To a solution of dihydropyridone **11** (245 mg, 0.751 mmol, 1.0 eq.) in benzene (3.7 mL), was added  $\text{MnO}_2$  (65 mg, 0.75 mmol, 1.0 eq.). The reaction mixture was allowed to be refluxed for 13 h. Additional  $\text{MnO}_2$  was added in 65 mg portions every hour until total amount reaches to 9.0 equivalent. Upon completion of the reaction monitored by TLC analysis, the reaction mixture was filtered with a celite pad to yield a filtrate. The filtrate was concentrated under reduced pressure to give a crude residue. Purification of the crude product by flash chromatography on silica gel, using  $\text{MeOH}/\text{CH}_2\text{Cl}_2$  as the eluant to give the titled product as a yellow solid (220 mg, 0.678 mmol, 90%): mp 78-80  $^\circ\text{C}$ ,  $R_f = 0.24$ ;  $\text{MeOH}/\text{CH}_2\text{Cl}_2 = 1/10$ ;  $[\alpha]_D^{23} +21.9$  ( $c$ : 1.0,  $\text{CHCl}_3$ );  $^1\text{H-NMR}$  (400 MHz, 25  $^\circ\text{C}$ ,  $\text{CDCl}_3$ ,  $\delta$ ): 1.40-1.56 (m, 2H, H-5 and H-6), 1.66-1.80 (m, 3H, H-3,

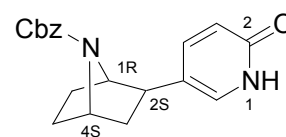

H-5 and H-6), 1.88 (dd,  $J = 9.2$  and  $12.0$  Hz, 1H, H-3 endo), 2.61 (dd,  $J = 4.4$  and  $8.0$  Hz, 1H, H-2), 4.14 (brs, 1H, H-1), 4.39 (brs, 1H, H-4), 5.06 (s, 2H,  $-\text{OCH}_2\text{Ph}$ ), 6.46 (d,  $J = 9.2$  Hz, 1H, H-3 in pyridone), 7.18 (s, 1H, H-6 in pyridone), 7.29 (brs, 5H -Ph), 7.40 (d,  $J = 9.2$  Hz, 1H, H-4 in pyridone), 13.3 (s, 1H, -NH);  $^{13}\text{C}$ -NMR (100 MHz, 25 °C,  $\text{CDCl}_3$ ,  $\delta$ ): 28.8 (t, C-5), 30.8 (t, C-6), 39.3 (t, C-3), 44.4 (d, C-2), 56.0 (d, C-4), 62.0 (d, C-1), 66.8 (t,  $\text{OCH}_2\text{Ph}$ ), 120.1 (d, C-3 in pyridone), 124.0 (s, C-5 in pyridone), 127.8 (d, C-2 in Ph), 127.9 (d, C-4 in Ph), 128.4 (d, C-3 in Ph), 131.5 (d, C-6 in pyridone), 136.4 (s, C-1 in Ph), 141.7 (d, C-4 in pyridone), 155.3 (s,  $\text{N}-\text{CO}-\text{O}$ ), 164.6 (s, C-2 in pyridone); EI-HRMS ( $m/z$ ):  $[\text{M}]^+$  calcd for  $\text{C}_{19}\text{H}_{20}\text{N}_2\text{O}_3^+$ , 324.1474; found, 324.1480 ( $\Delta = 1.9$  ppm).

HPLC condition: Chiralcel OD-H, 250 mm X 4.6 mm, 5  $\mu\text{m}$ ; Mobile phase A: IPA : n-Hex = 1 : 4 (v/v); Mobile phase B: pure n-Hex; isocratic, 80% A : 20% B; flow rate 1.0 mL per min; detection UV 310 nm,  $t_{\text{R}}$ : 21.7 min for (-)-**12**, 29.7 min for (+)-**12**.

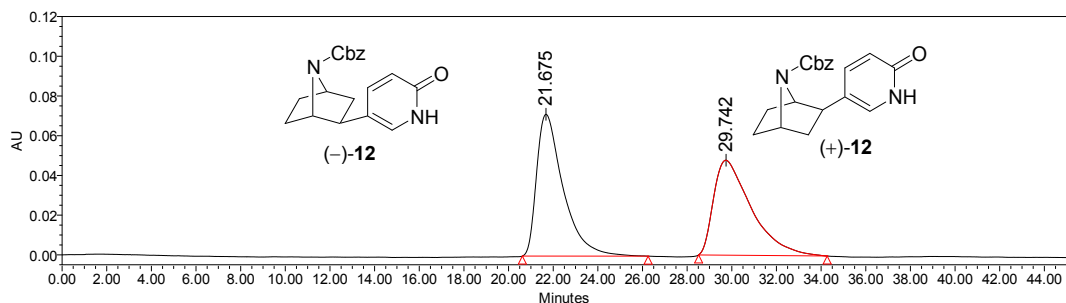

|   | Retention Time | Area    | % Area | Height |
|---|----------------|---------|--------|--------|
| 1 | 21.675         | 5894555 | 51.26  | 71377  |
| 2 | 29.742         | 5603737 | 48.74  | 47797  |

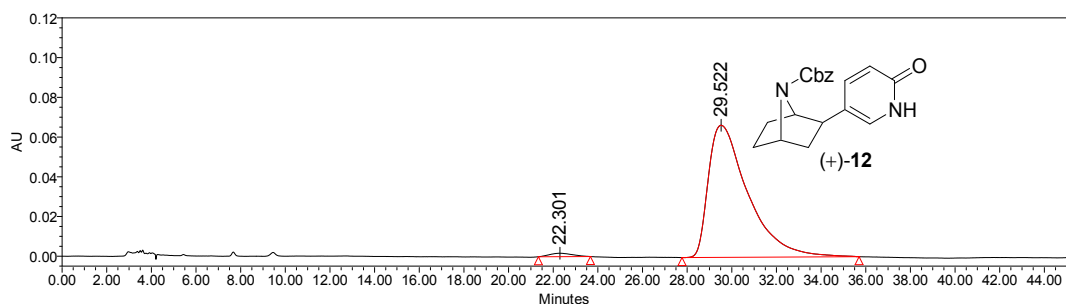

|   | Retention Time | Area    | % Area | Height |
|---|----------------|---------|--------|--------|
| 1 | 22.301         | 123305  | 1.48   | 1727   |
| 2 | 29.522         | 8210735 | 98.52  | 66521  |

**5-[(1'R,2'S,4'S)-7-formyl-7-azabicyclo[2.2.1]heptan-2-yl]-2-chloropyridine**

**(13):** To a mixture of pyridone **12** (190 mg, 0.586 mmol, 1.0 eq.) and DMF (300  $\mu$ L, 3.87 mmol, 6.6 eq.) in an ice bath, was slowly added POCl<sub>3</sub> (300  $\mu$ L, 3.22 mmol, 5.5 eq.). The reaction mixture was allowed to be stirred at 80 °C for 8.5 h. Upon completion of the reaction monitored by TLC analysis, chilled CH<sub>2</sub>Cl<sub>2</sub> (1 mL) was added. The reaction mixture was transferred to a chilled biphasic solution of NaOH (1 N, 5 mL) and CH<sub>2</sub>Cl<sub>2</sub> (5 mL). The pH value was controlled in the range of 9~10. The aqueous solution was extracted with CH<sub>2</sub>Cl<sub>2</sub> (4 mL X5). The combined organic layers were dried over anhydrous Na<sub>2</sub>SO<sub>4</sub> and then concentrated under reduced pressure to give a crude product. Purification of the crude product by flash chromatography on silica gel, using MeOH/CH<sub>2</sub>Cl<sub>2</sub>/Et<sub>3</sub>N as the eluant to give the titled product as a yellow oil (101 mg, 0.427 mmol, 73%):  $R_f$  = 0.43; MeOH/CH<sub>2</sub>Cl<sub>2</sub> = 1/20; <sup>1</sup>H-NMR (400 MHz, 25 °C, CDCl<sub>3</sub>,  $\delta$ ): <sup>2</sup> 1.55-1.90 (m, 10H), 2.06 (dd,  $J$  = 8.8 and 12.4 Hz, 1H), 2.15 (dd,  $J$  = 9.2 and 12.4 Hz, 1H), 2.99 (t,  $J$  = 4.0 Hz, 1H), 3.01 (t,  $J$  = 4.0 Hz, 1H), 3.89 (d,  $J$  = 4.0 Hz, 1H), 4.27 (t,  $J$  = 4.4 Hz, 1H), 4.61 (d,  $J$  = 4.4 Hz, 1H), 4.78 (t,  $J$  = 4.8 Hz, 1H), 7.20 (d,  $J$  = 8.4 Hz, 1H), 7.23 (d,  $J$  = 8.4 Hz, 1H), 7.43 (dd,  $J$  = 2.4 and 8.8 Hz, 1H), 7.53 (dd,  $J$  = 2.8 and 8.8 Hz, 1H), 7.99 (s, 1H), 8.16 (d,  $J$  = 2.0 Hz, 1H), 8.17 (s, 1H), 8.19 (d,  $J$  = 2.0 Hz, 1H); <sup>13</sup>C-NMR (100 MHz, 25 °C, CDCl<sub>3</sub>,  $\delta$ ): 28.2 (t), 29.1 (t), 29.8 (t), 30.7 (t), 38.7 (t), 41.2 (t), 44.1 (d), 44.8 (d), 51.6 (d), 55.3 (d), 56.6 (d), 61.8 (d), 124.2 (d), 124.4 (d), 136.4 (d), 136.8 (d), 138.5 (s), 139.0 (s), 148.4 (d), 148.7 (d), 149.4 (s), 149.8 (s), 157.2 (d), 157.6 (d). EI-HRMS ( $m/z$ ): [M]<sup>+</sup> calcd for C<sub>12</sub>H<sub>13</sub>ClN<sub>2</sub>O<sup>+</sup>, 236.0716; found, 236.0712 ( $\Delta$  = 1.7 ppm).

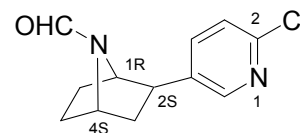**(-)-5-[(1'R,2'S,4'S)-7-azabicyclo[2.2.1]heptan-2-yl]-2-chloropyridine**

**(epibatidine, 1):** To a solution of formamide **13** (107 mg, 0.452 mmol, 1.0 eq.) in MeOH (0.4 mL) in an ice bath, was slowly added HCl in methanol solution (5%, 0.6 mL). The reaction mixture was allowed to be stirred at 60 °C for 2 h. Upon completion of the reaction monitored by TLC analysis, chilled CH<sub>2</sub>Cl<sub>2</sub> (1 mL) was added. The reaction mixture was transferred to a chilled biphasic solution of K<sub>2</sub>CO<sub>3</sub> (10%, 8 mL) and CH<sub>2</sub>Cl<sub>2</sub> (5 mL). The pH value was controlled in the range of 9~10. The aqueous solution was extracted with CH<sub>2</sub>Cl<sub>2</sub> (3 mL X5). The combined organic layers were dried over anhydrous Na<sub>2</sub>SO<sub>4</sub> and then concentrated under reduced pressure to give a crude product. Purification of the crude product by flash chromatography on silica gel,

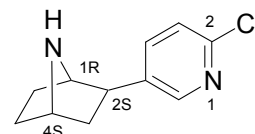

<sup>2</sup> The product appears as an equal amount of E/Z mixture.

using MeOH/CH<sub>2</sub>Cl<sub>2</sub>/NEt<sub>3</sub> as the eluant to give the titled product as a yellow oil (87 mg, 0.417 mmol, 92%):  $R_f = 0.15$ ; MeOH/CH<sub>2</sub>Cl<sub>2</sub>/NEt<sub>3</sub> = 1/20/0.2;  $[\alpha]_D^{25} -6.8$  ( $c: 1.0$ , CHCl<sub>3</sub>), [lit.<sup>3</sup>  $[\alpha]_D^{25} -6.5$  ( $c: 1.0$ , CHCl<sub>3</sub>)]; <sup>1</sup>H-NMR (400 MHz, 25 °C, CDCl<sub>3</sub>,  $\delta$ ): 1.42-1.55 (m, 5H, H-3, H-5 X2 and H-6 X2), 1.69 (s, 1H, NH), 1.83 (dd,  $J = 8.8$  and 12.0 Hz, 1H, H-3 endo), 2.69 (dd,  $J = 4.4$  and 8.8 Hz, 1H, H-2), 3.48 (brs, 1H, H-1), 3.72 (t,  $J = 4.0$  Hz, 1H, H-4), 7.15 (d,  $J = 8.4$  Hz, 1H, H-3 in pyridine), 7.70 (dd,  $J = 2.4$  and 8.0 Hz, 1H, H-4 in pyridine), 8.20 (d,  $J = 2.4$  Hz, 1H, H-6 in pyridine); <sup>13</sup>C-NMR (100 MHz, 25 °C, CDCl<sub>3</sub>,  $\delta$ ): 30.0 (t, C-5), 31.2 (t, C-6), 40.2 (t, C-3), 44.3 (d, C-2), 56.0 (d, C-4), 62.6 (d, C-1), 123.7 (d, C-3 in pyridine), 137.6 (d, C-4 in pyridine), 141.0 (s, C-5 in pyridine), 148.6 (d, C-6 in pyridine), 148.7 (s, C-2 in pyridine). EI-HRMS ( $m/z$ ):  $[M]^+$  calcd for C<sub>11</sub>H<sub>13</sub>ClN<sub>2</sub><sup>+</sup>, 208.0767; found, 208.0763 ( $\Delta = 1.9$  ppm).

HPLC condition: Chiralcel OD-H, 250 mm X 4.6 mm, 5  $\mu$ m; Mobile phase A: 0.1% Et<sub>2</sub>NH in an IPA/n-Hex solution ( $v/v = 1/15$ ); Mobile phase B: pure n-Hex; isocratic, 50% A : 50% B; flow rate 1.0 mL per min; detection UV 274 nm,  $t_R$ : 18.5 min for (-)-**1**, 21.6 min for (+)-**1**.

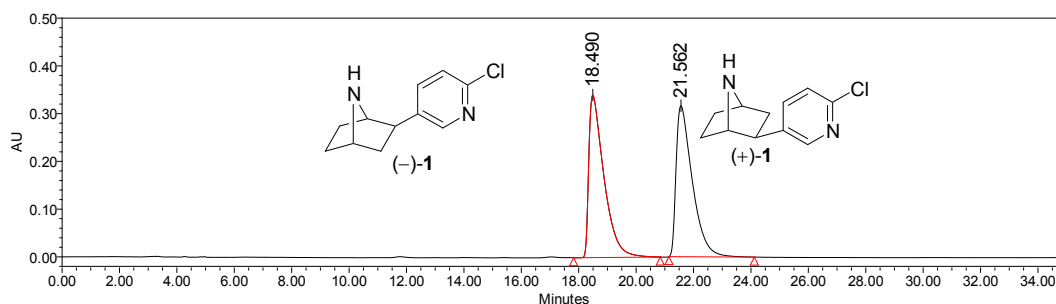

|   | Retention Time | Area     | % Area | Height |
|---|----------------|----------|--------|--------|
| 1 | 18.490         | 12450854 | 50.11  | 340284 |
| 2 | 21.562         | 12396237 | 49.89  | 316282 |

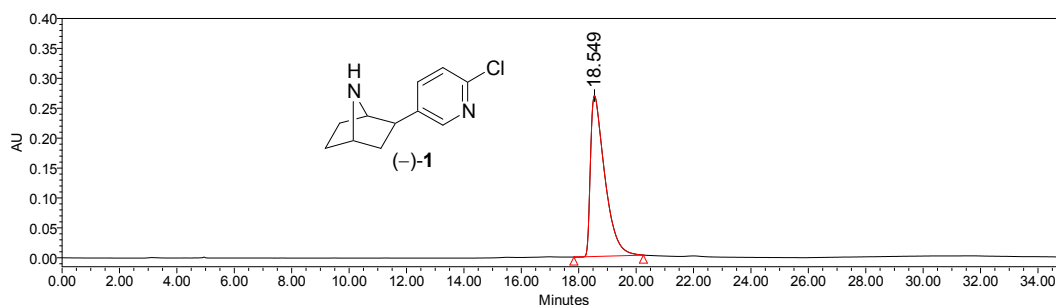

<sup>3</sup> Fletcher, S. R.; Baker, R.; Chambers, M. S.; Herbert, R. H.; Hobbs, S. C.; Thomas, S. R.; Verrier, H. M.; Watt, A. P.; Ball, R. G. *J. Org. Chem.* **1994**, *59*, 1771.

**(+)-5-[(1'R,2'S,4'S)-7-methyl-7-azabicyclo[2.2.1]heptan-2-yl]-2-**

**chloropyridine: (*N*-methyl-epibatidine, **14**):** To a THF solution (2 mL) of 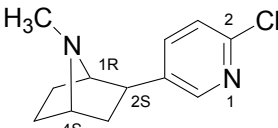 LiAlH<sub>4</sub> (72 mg, 1.90 mmol, 5.0 eq.) and Et<sub>3</sub>N•HCl (262 mg, 1.90 mmol, 5.0 eq.) in an ice bath, was slowly added a solution of formamide **13** (90 mg, 0.380 mmol, 1.0 eq.) in THF (2 mL). The reaction mixture was allowed to be stirred at room temperature overnight. Upon completion of the reaction monitored by TLC analysis, chilled CH<sub>2</sub>Cl<sub>2</sub> (1 mL) was added, followed by slow addition of a NaOH solution (10%, 1.5 mL). The reaction mixture was allowed to be stirred for another 10 min until white precipitate has been settled down. After separation of the precipitate, the filtrate was concentrated under reduced pressure to give a crude product. Purification of the crude product by flash chromatography on silica gel, using MeOH/CH<sub>2</sub>Cl<sub>2</sub>/NEt<sub>3</sub> as the eluant to give the titled product as a yellow solid (64 mg, 0.287 mmol, 76%): mp 76-78 °C, *R*<sub>f</sub> = 0.28; MeOH/CH<sub>2</sub>Cl<sub>2</sub> = 1/20; [α]<sub>D</sub><sup>25</sup> +18.5 (*c*: 1.0, CHCl<sub>3</sub>); <sup>1</sup>H-NMR (400 MHz, 25 °C, CDCl<sub>3</sub>, δ): 1.34-1.44 (m, 2H, H-5 and H-6), 1.58-1.66 (m, 1H, H-3), 1.80 (dd, *J* = 9.6 and 11.6 Hz, 1H, H-3 endo), 1.84-1.94 (m, 2H, H-5 and H-6), 2.21 (s, 3H, NCH<sub>3</sub>) 2.61 (dd, *J* = 4.8 and 9.2 Hz, 1H, H-2), 3.09 (d, *J* = 4.0 Hz, 1H, H-1), 3.29 (t, *J* = 4.0 Hz, 1H, H-4), 7.17 (d, *J* = 8.4 Hz, 1H, H-3 in pyridine), 7.85 (dd, *J* = 2.0 and 8.0 Hz, 1H, H-4 in pyridine), 8.25 (d, *J* = 2.0 Hz, 1H, H-6 in pyridine); <sup>13</sup>C-NMR (100 MHz, 25 °C, CDCl<sub>3</sub>, δ): 25.4 (t, C-5), 26.3 (t, C-6), 34.5 (q, NCH<sub>3</sub>), 41.5 (t, C-3), 45.3 (d, C-2), 61.1 (d, C-4), 67.4 (d, C-1), 123.6 (d, C-3 in pyridine), 138.0 (d, C-4 in pyridine), 141.7 (s, C-5 in pyridine), 148.6 (s, C-2 in pyridine), 148.8 (d, C-6 in pyridine); EI-HRMS (*m/z*): [M]<sup>+</sup> calcd for C<sub>12</sub>H<sub>15</sub>ClN<sub>2</sub><sup>+</sup>, 222.0924; found, 222.0927 (Δ = 1.4 ppm).



HPLC condition: Chiralcel OD-H, 250 mm X 4.6 mm, 5  $\mu$ m; Mobile phase A: 0.1% Et<sub>2</sub>NH in an IPA/n-Hex solution (v/v = 1/15); Mobile phase B: pure n-Hex; isocratic, 50% A : 50% B; flow rate 1.0 mL per min; detection UV 273 nm,  $t_R$ : 6.6 min for (-)-**14**, 7.9 min for (+)-**14**.

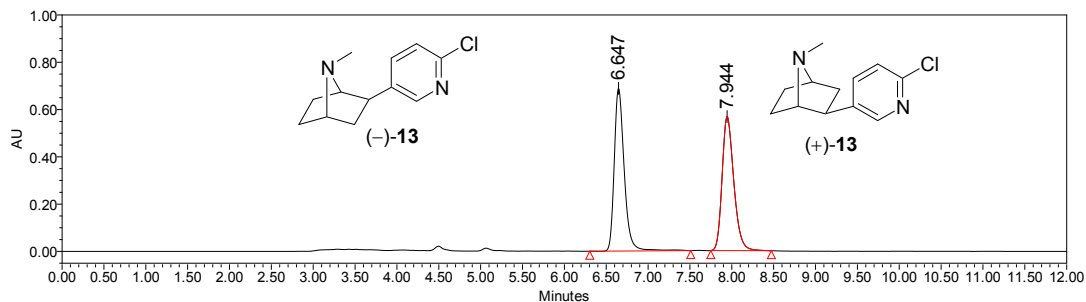

|   | Retention Time | Area    | % Area | Height |
|---|----------------|---------|--------|--------|
| 1 | 6.647          | 5701753 | 50.89  | 687950 |
| 2 | 7.944          | 5502199 | 49.11  | 567187 |

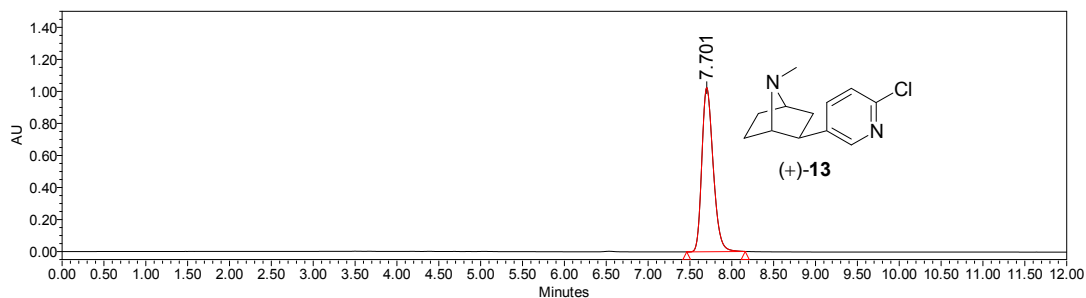

Table 1. Crystal data and structure refinement for **4a**.

|                                   |                                                               |          |
|-----------------------------------|---------------------------------------------------------------|----------|
| Identification code               | corn                                                          |          |
| Empirical formula                 | C <sub>25</sub> H <sub>26</sub> N <sub>2</sub> O <sub>5</sub> |          |
| Formula weight                    | 434.48                                                        |          |
| Temperature                       | 150(2) K                                                      |          |
| Wavelength                        | 1.54178 Å                                                     |          |
| Crystal system                    | Orthorhombic                                                  |          |
| Space group                       | P 21 21 21                                                    |          |
| Unit cell dimensions              | a = 8.2328(2) Å                                               | α = 90°. |
|                                   | b = 12.2627(2) Å                                              | β = 90°. |
|                                   | c = 21.8139(4) Å                                              | γ = 90°. |
| Volume                            | 2202.25(8) Å <sup>3</sup>                                     |          |
| Z                                 | 4                                                             |          |
| Density (calculated)              | 1.310 Mg/m <sup>3</sup>                                       |          |
| Absorption coefficient            | 0.750 mm <sup>-1</sup>                                        |          |
| F(000)                            | 920                                                           |          |
| Crystal size                      | 0.42 x 0.40 x 0.32 mm <sup>3</sup>                            |          |
| Theta range for data collection   | 4.05 to 72.34°.                                               |          |
| Index ranges                      | -9 ≤ h ≤ 10, -9 ≤ k ≤ 14, -26 ≤ l ≤ 19                        |          |
| Reflections collected             | 8398                                                          |          |
| Independent reflections           | 4239 [R(int) = 0.0196]                                        |          |
| Completeness to theta = 72.34°    | 98.9 %                                                        |          |
| Absorption correction             | Semi-empirical from equivalents                               |          |
| Max. and min. transmission        | 1.00000 and 0.96097                                           |          |
| Refinement method                 | Full-matrix least-squares on F <sup>2</sup>                   |          |
| Data / restraints / parameters    | 4239 / 0 / 290                                                |          |
| Goodness-of-fit on F <sup>2</sup> | 1.013                                                         |          |
| Final R indices [I > 2σ(I)]       | R1 = 0.0315, wR2 = 0.0839                                     |          |
| R indices (all data)              | R1 = 0.0338, wR2 = 0.0855                                     |          |
| Absolute structure parameter      | 0.07(15)                                                      |          |
| Extinction coefficient            | 0.0038(3)                                                     |          |
| Largest diff. peak and hole       | 0.180 and -0.142 e.Å <sup>-3</sup>                            |          |

Table 2. Atomic coordinates ( $\times 10^4$ ) and equivalent isotropic displacement parameters ( $\text{\AA}^2 \times 10^3$ ) for **4a**.  $U(\text{eq})$  is defined as one third of the trace of the orthogonalized  $U^{ij}$  tensor.

|       | x        | y       | z       | $U(\text{eq})$ |
|-------|----------|---------|---------|----------------|
| O(1)  | 2288(1)  | 3644(1) | 1364(1) | 26(1)          |
| O(2)  | 2368(2)  | 5290(1) | 896(1)  | 35(1)          |
| O(3)  | -1037(2) | 4695(1) | 1840(1) | 34(1)          |
| O(4)  | -2567(1) | 1506(1) | 1442(1) | 34(1)          |
| O(5)  | -1535(1) | 1229(1) | 2374(1) | 30(1)          |
| N(1)  | 814(2)   | 3901(1) | 517(1)  | 26(1)          |
| N(2)  | -1493(2) | 2929(1) | 2029(1) | 22(1)          |
| C(1)  | 3336(2)  | 3584(1) | 2921(1) | 28(1)          |
| C(2)  | 3513(2)  | 2840(2) | 3397(1) | 36(1)          |
| C(3)  | 3954(2)  | 1777(2) | 3272(1) | 38(1)          |
| C(4)  | 4207(2)  | 1449(1) | 2671(1) | 35(1)          |
| C(5)  | 4028(2)  | 2185(1) | 2197(1) | 30(1)          |
| C(6)  | 3593(2)  | 3263(1) | 2318(1) | 24(1)          |
| C(7)  | 3430(2)  | 4074(1) | 1807(1) | 28(1)          |
| C(8)  | 1842(2)  | 4368(1) | 924(1)  | 25(1)          |
| C(9)  | -308(2)  | 3000(1) | 660(1)  | 25(1)          |
| C(10) | -819(2)  | 2646(2) | 13(1)   | 35(1)          |
| C(11) | -787(2)  | 3734(2) | -351(1) | 42(1)          |
| C(12) | -328(2)  | 4563(2) | 145(1)  | 33(1)          |
| C(13) | -1773(2) | 4705(1) | 587(1)  | 35(1)          |
| C(14) | -1767(2) | 3626(1) | 956(1)  | 25(1)          |
| C(15) | -1430(2) | 3820(1) | 1632(1) | 24(1)          |
| C(16) | -1930(2) | 1860(1) | 1896(1) | 25(1)          |
| C(17) | -576(2)  | 1844(1) | 2814(1) | 28(1)          |
| C(18) | -913(2)  | 3038(1) | 2662(1) | 21(1)          |
| C(19) | -2158(2) | 3584(1) | 3084(1) | 25(1)          |
| C(20) | -1453(2) | 3702(1) | 3719(1) | 23(1)          |
| C(21) | -1849(2) | 2978(1) | 4182(1) | 36(1)          |
| C(22) | -1079(3) | 3033(2) | 4746(1) | 45(1)          |
| C(23) | 100(2)   | 3816(2) | 4854(1) | 40(1)          |
| C(24) | 483(2)   | 4552(1) | 4400(1) | 36(1)          |
| C(25) | -289(2)  | 4497(1) | 3834(1) | 29(1)          |

Table 3. Bond lengths [ $\text{\AA}$ ] and angles [ $^\circ$ ] for **4a**.

---

|              |            |
|--------------|------------|
| O(1)-C(8)    | 1.3570(17) |
| O(1)-C(7)    | 1.4491(17) |
| O(2)-C(8)    | 1.2122(18) |
| O(3)-C(15)   | 1.2094(18) |
| O(4)-C(16)   | 1.2020(18) |
| O(5)-C(16)   | 1.3390(18) |
| O(5)-C(17)   | 1.4548(18) |
| N(1)-C(8)    | 1.356(2)   |
| N(1)-C(9)    | 1.4725(19) |
| N(1)-C(12)   | 1.4829(19) |
| N(2)-C(16)   | 1.3903(18) |
| N(2)-C(15)   | 1.3959(18) |
| N(2)-C(18)   | 1.4677(17) |
| C(1)-C(2)    | 1.389(2)   |
| C(1)-C(6)    | 1.391(2)   |
| C(1)-H(1A)   | 0.9500     |
| C(2)-C(3)    | 1.381(3)   |
| C(2)-H(2A)   | 0.9500     |
| C(3)-C(4)    | 1.387(2)   |
| C(3)-H(3A)   | 0.9500     |
| C(4)-C(5)    | 1.379(2)   |
| C(4)-H(4A)   | 0.9500     |
| C(5)-C(6)    | 1.394(2)   |
| C(5)-H(5A)   | 0.9500     |
| C(6)-C(7)    | 1.499(2)   |
| C(7)-H(7A)   | 0.9900     |
| C(7)-H(7B)   | 0.9900     |
| C(9)-C(10)   | 1.535(2)   |
| C(9)-C(14)   | 1.5650(19) |
| C(9)-H(9A)   | 1.0000     |
| C(10)-C(11)  | 1.552(3)   |
| C(10)-H(10A) | 0.9900     |
| C(10)-H(10B) | 0.9900     |
| C(11)-C(12)  | 1.533(2)   |
| C(11)-H(11A) | 0.9900     |
| C(11)-H(11B) | 0.9900     |
| C(12)-C(13)  | 1.541(2)   |
| C(12)-H(12A) | 1.0000     |
| C(13)-C(14)  | 1.549(2)   |
| C(13)-H(13A) | 0.9900     |
| C(13)-H(13B) | 0.9900     |
| C(14)-C(15)  | 1.520(2)   |
| C(14)-H(14A) | 1.0000     |
| C(17)-C(18)  | 1.526(2)   |
| C(17)-H(17A) | 0.9900     |
| C(17)-H(17B) | 0.9900     |

|              |            |
|--------------|------------|
| C(18)-C(19)  | 1.5310(19) |
| C(18)-H(18A) | 1.0000     |
| C(19)-C(20)  | 1.5089(19) |
| C(19)-H(19A) | 0.9900     |
| C(19)-H(19B) | 0.9900     |
| C(20)-C(21)  | 1.384(2)   |
| C(20)-C(25)  | 1.390(2)   |
| C(21)-C(22)  | 1.386(2)   |
| C(21)-H(21A) | 0.9500     |
| C(22)-C(23)  | 1.385(3)   |
| C(22)-H(22A) | 0.9500     |
| C(23)-C(24)  | 1.376(3)   |
| C(23)-H(23A) | 0.9500     |
| C(24)-C(25)  | 1.390(2)   |
| C(24)-H(24A) | 0.9500     |
| C(25)-H(25A) | 0.9500     |

|                  |            |
|------------------|------------|
| C(8)-O(1)-C(7)   | 114.11(11) |
| C(16)-O(5)-C(17) | 110.24(11) |
| C(8)-N(1)-C(9)   | 124.73(12) |
| C(8)-N(1)-C(12)  | 121.51(13) |
| C(9)-N(1)-C(12)  | 97.42(12)  |
| C(16)-N(2)-C(15) | 128.16(12) |
| C(16)-N(2)-C(18) | 111.53(11) |
| C(15)-N(2)-C(18) | 120.08(11) |
| C(2)-C(1)-C(6)   | 120.38(15) |
| C(2)-C(1)-H(1A)  | 119.8      |
| C(6)-C(1)-H(1A)  | 119.8      |
| C(1)-C(2)-C(3)   | 119.98(16) |
| C(1)-C(2)-H(2A)  | 120.0      |
| C(3)-C(2)-H(2A)  | 120.0      |
| C(4)-C(3)-C(2)   | 120.02(16) |
| C(4)-C(3)-H(3A)  | 120.0      |
| C(2)-C(3)-H(3A)  | 120.0      |
| C(3)-C(4)-C(5)   | 120.12(16) |
| C(3)-C(4)-H(4A)  | 119.9      |
| C(5)-C(4)-H(4A)  | 119.9      |
| C(4)-C(5)-C(6)   | 120.45(15) |
| C(4)-C(5)-H(5A)  | 119.8      |
| C(6)-C(5)-H(5A)  | 119.8      |
| C(1)-C(6)-C(5)   | 119.06(14) |
| C(1)-C(6)-C(7)   | 120.10(14) |
| C(5)-C(6)-C(7)   | 120.83(14) |
| O(1)-C(7)-C(6)   | 108.18(12) |
| O(1)-C(7)-H(7A)  | 110.1      |
| C(6)-C(7)-H(7A)  | 110.1      |
| O(1)-C(7)-H(7B)  | 110.1      |
| C(6)-C(7)-H(7B)  | 110.1      |
| H(7A)-C(7)-H(7B) | 108.4      |

|                     |            |
|---------------------|------------|
| O(2)-C(8)-O(1)      | 123.41(14) |
| O(2)-C(8)-N(1)      | 125.70(14) |
| O(1)-C(8)-N(1)      | 110.81(13) |
| N(1)-C(9)-C(10)     | 100.91(12) |
| N(1)-C(9)-C(14)     | 101.60(11) |
| C(10)-C(9)-C(14)    | 107.89(12) |
| N(1)-C(9)-H(9A)     | 114.9      |
| C(10)-C(9)-H(9A)    | 114.9      |
| C(14)-C(9)-H(9A)    | 114.9      |
| C(9)-C(10)-C(11)    | 102.87(13) |
| C(9)-C(10)-H(10A)   | 111.2      |
| C(11)-C(10)-H(10A)  | 111.2      |
| C(9)-C(10)-H(10B)   | 111.2      |
| C(11)-C(10)-H(10B)  | 111.2      |
| H(10A)-C(10)-H(10B) | 109.1      |
| C(12)-C(11)-C(10)   | 102.30(12) |
| C(12)-C(11)-H(11A)  | 111.3      |
| C(10)-C(11)-H(11A)  | 111.3      |
| C(12)-C(11)-H(11B)  | 111.3      |
| C(10)-C(11)-H(11B)  | 111.3      |
| H(11A)-C(11)-H(11B) | 109.2      |
| N(1)-C(12)-C(11)    | 100.29(13) |
| N(1)-C(12)-C(13)    | 102.10(11) |
| C(11)-C(12)-C(13)   | 109.03(15) |
| N(1)-C(12)-H(12A)   | 114.6      |
| C(11)-C(12)-H(12A)  | 114.6      |
| C(13)-C(12)-H(12A)  | 114.6      |
| C(12)-C(13)-C(14)   | 103.06(13) |
| C(12)-C(13)-H(13A)  | 111.2      |
| C(14)-C(13)-H(13A)  | 111.2      |
| C(12)-C(13)-H(13B)  | 111.2      |
| C(14)-C(13)-H(13B)  | 111.2      |
| H(13A)-C(13)-H(13B) | 109.1      |
| C(15)-C(14)-C(13)   | 111.78(13) |
| C(15)-C(14)-C(9)    | 109.71(12) |
| C(13)-C(14)-C(9)    | 101.94(12) |
| C(15)-C(14)-H(14A)  | 111.0      |
| C(13)-C(14)-H(14A)  | 111.0      |
| C(9)-C(14)-H(14A)   | 111.0      |
| O(3)-C(15)-N(2)     | 118.08(13) |
| O(3)-C(15)-C(14)    | 123.58(13) |
| N(2)-C(15)-C(14)    | 118.24(12) |
| O(4)-C(16)-O(5)     | 122.60(14) |
| O(4)-C(16)-N(2)     | 128.76(14) |
| O(5)-C(16)-N(2)     | 108.64(12) |
| O(5)-C(17)-C(18)    | 104.83(11) |
| O(5)-C(17)-H(17A)   | 110.8      |
| C(18)-C(17)-H(17A)  | 110.8      |
| O(5)-C(17)-H(17B)   | 110.8      |

|                     |            |
|---------------------|------------|
| C(18)-C(17)-H(17B)  | 110.8      |
| H(17A)-C(17)-H(17B) | 108.9      |
| N(2)-C(18)-C(17)    | 100.15(10) |
| N(2)-C(18)-C(19)    | 112.71(11) |
| C(17)-C(18)-C(19)   | 114.25(12) |
| N(2)-C(18)-H(18A)   | 109.8      |
| C(17)-C(18)-H(18A)  | 109.8      |
| C(19)-C(18)-H(18A)  | 109.8      |
| C(20)-C(19)-C(18)   | 109.56(11) |
| C(20)-C(19)-H(19A)  | 109.8      |
| C(18)-C(19)-H(19A)  | 109.8      |
| C(20)-C(19)-H(19B)  | 109.8      |
| C(18)-C(19)-H(19B)  | 109.8      |
| H(19A)-C(19)-H(19B) | 108.2      |
| C(21)-C(20)-C(25)   | 118.68(14) |
| C(21)-C(20)-C(19)   | 121.18(14) |
| C(25)-C(20)-C(19)   | 119.95(13) |
| C(20)-C(21)-C(22)   | 120.62(16) |
| C(20)-C(21)-H(21A)  | 119.7      |
| C(22)-C(21)-H(21A)  | 119.7      |
| C(23)-C(22)-C(21)   | 120.35(16) |
| C(23)-C(22)-H(22A)  | 119.8      |
| C(21)-C(22)-H(22A)  | 119.8      |
| C(24)-C(23)-C(22)   | 119.48(15) |
| C(24)-C(23)-H(23A)  | 120.3      |
| C(22)-C(23)-H(23A)  | 120.3      |
| C(23)-C(24)-C(25)   | 120.18(16) |
| C(23)-C(24)-H(24A)  | 119.9      |
| C(25)-C(24)-H(24A)  | 119.9      |
| C(20)-C(25)-C(24)   | 120.66(15) |
| C(20)-C(25)-H(25A)  | 119.7      |
| C(24)-C(25)-H(25A)  | 119.7      |

---

Symmetry transformations used to generate equivalent atoms:

Table 4. Anisotropic displacement parameters ( $\text{\AA}^2 \times 10^3$ ) for **4a**. The anisotropic displacement factor exponent takes the form:  $-2\pi^2 [ h^2 a^{*2} U^{11} + \dots + 2 h k a^* b^* U^{12} ]$

|       | U <sup>11</sup> | U <sup>22</sup> | U <sup>33</sup> | U <sup>23</sup> | U <sup>13</sup> | U <sup>12</sup> |
|-------|-----------------|-----------------|-----------------|-----------------|-----------------|-----------------|
| O(1)  | 27(1)           | 24(1)           | 27(1)           | 0(1)            | -7(1)           | -2(1)           |
| O(2)  | 41(1)           | 30(1)           | 35(1)           | 7(1)            | -1(1)           | -8(1)           |
| O(3)  | 53(1)           | 22(1)           | 26(1)           | -1(1)           | 2(1)            | -1(1)           |
| O(4)  | 34(1)           | 34(1)           | 33(1)           | -11(1)          | -4(1)           | -5(1)           |
| O(5)  | 37(1)           | 21(1)           | 31(1)           | 0(1)            | 1(1)            | -2(1)           |
| N(1)  | 26(1)           | 31(1)           | 22(1)           | 1(1)            | -1(1)           | 1(1)            |
| N(2)  | 23(1)           | 22(1)           | 20(1)           | -3(1)           | 0(1)            | -1(1)           |
| C(1)  | 18(1)           | 34(1)           | 32(1)           | -6(1)           | -2(1)           | 4(1)            |
| C(2)  | 28(1)           | 53(1)           | 26(1)           | 1(1)            | -1(1)           | 0(1)            |
| C(3)  | 30(1)           | 44(1)           | 41(1)           | 16(1)           | -6(1)           | -5(1)           |
| C(4)  | 30(1)           | 28(1)           | 47(1)           | 1(1)            | -10(1)          | 2(1)            |
| C(5)  | 24(1)           | 32(1)           | 33(1)           | -5(1)           | -2(1)           | 3(1)            |
| C(6)  | 15(1)           | 30(1)           | 27(1)           | -2(1)           | -3(1)           | 0(1)            |
| C(7)  | 27(1)           | 28(1)           | 29(1)           | -1(1)           | -7(1)           | -5(1)           |
| C(8)  | 24(1)           | 28(1)           | 23(1)           | 2(1)            | 3(1)            | 3(1)            |
| C(9)  | 24(1)           | 30(1)           | 21(1)           | -6(1)           | -1(1)           | 0(1)            |
| C(10) | 28(1)           | 52(1)           | 25(1)           | -15(1)          | 0(1)            | -1(1)           |
| C(11) | 38(1)           | 70(1)           | 19(1)           | -2(1)           | -3(1)           | 4(1)            |
| C(12) | 34(1)           | 45(1)           | 21(1)           | 9(1)            | -1(1)           | 6(1)            |
| C(13) | 36(1)           | 43(1)           | 25(1)           | 7(1)            | -2(1)           | 14(1)           |
| C(14) | 23(1)           | 33(1)           | 20(1)           | 0(1)            | -1(1)           | 6(1)            |
| C(15) | 24(1)           | 25(1)           | 22(1)           | 0(1)            | 2(1)            | 4(1)            |
| C(16) | 20(1)           | 26(1)           | 29(1)           | -4(1)           | 4(1)            | -3(1)           |
| C(17) | 32(1)           | 27(1)           | 26(1)           | 0(1)            | -4(1)           | 2(1)            |
| C(18) | 19(1)           | 23(1)           | 19(1)           | -1(1)           | -1(1)           | -2(1)           |
| C(19) | 20(1)           | 31(1)           | 24(1)           | -2(1)           | 0(1)            | 1(1)            |
| C(20) | 23(1)           | 25(1)           | 21(1)           | -4(1)           | 3(1)            | 2(1)            |
| C(21) | 49(1)           | 32(1)           | 25(1)           | -2(1)           | 4(1)            | -10(1)          |
| C(22) | 74(1)           | 36(1)           | 24(1)           | 3(1)            | -2(1)           | -1(1)           |
| C(23) | 48(1)           | 47(1)           | 26(1)           | -10(1)          | -10(1)          | 17(1)           |
| C(24) | 30(1)           | 42(1)           | 37(1)           | -17(1)          | -1(1)           | -1(1)           |
| C(25) | 30(1)           | 28(1)           | 28(1)           | -4(1)           | 5(1)            | -3(1)           |



Table 5. Hydrogen coordinates ( $\times 10^4$ ) and isotropic displacement parameters ( $\text{\AA}^2 \times 10^3$ ) for **4a**.

|        | x     | y    | z    | U(eq) |
|--------|-------|------|------|-------|
| H(1A)  | 3037  | 4316 | 3009 | 34    |
| H(2A)  | 3331  | 3063 | 3808 | 43    |
| H(3A)  | 4085  | 1270 | 3597 | 46    |
| H(4A)  | 4505  | 717  | 2585 | 42    |
| H(5A)  | 4202  | 1956 | 1786 | 35    |
| H(7A)  | 3033  | 4779 | 1970 | 34    |
| H(7B)  | 4499  | 4198 | 1611 | 34    |
| H(9A)  | 164   | 2408 | 919  | 30    |
| H(10A) | -1921 | 2323 | 14   | 42    |
| H(10B) | -44   | 2112 | -161 | 42    |
| H(11A) | 35    | 3713 | -682 | 51    |
| H(11B) | -1864 | 3899 | -530 | 51    |
| H(12A) | 137   | 5261 | -15  | 40    |
| H(13A) | -2803 | 4797 | 359  | 42    |
| H(13B) | -1611 | 5341 | 859  | 42    |
| H(14A) | -2807 | 3218 | 897  | 30    |
| H(17A) | 594   | 1676 | 2769 | 34    |
| H(17B) | -916  | 1673 | 3239 | 34    |
| H(18A) | 126   | 3460 | 2669 | 25    |
| H(19A) | -2448 | 4311 | 2919 | 30    |
| H(19B) | -3158 | 3137 | 3101 | 30    |
| H(21A) | -2656 | 2438 | 4112 | 43    |
| H(22A) | -1361 | 2531 | 5060 | 54    |
| H(23A) | 640   | 3844 | 5239 | 48    |
| H(24A) | 1276  | 5099 | 4474 | 44    |
| H(25A) | -18   | 5008 | 3523 | 34    |

3 <sup>1</sup>H NMR

```

acid
exp4 PROTON 0.921
SAMPLE
date Jan 24 2013
solvent cdc13
file /home/vchiou/~
nmrSYS/data/CORN/221ac~
221ac/CORN 221ac~
id_H.fid
ACQUISITION
sv 6410.3
at 2.556
np 32768
fb 4000
bs 4
d1 1.000
nt 128
ct 52
TRANSMITTER H1
tn 399.756
sfrq 399.7
tof 4796.9
tpwr 60
pw 6.650
DECOUPLER C13
dn 0
dof 0
dm nnn
decwave W40_4nuc
dpwr 37
dmf 29412
ai 3
ph
PRESATURATION
satmode n
wet SPECIAL
temp not used
gain 30
spin not used
hst 0.008
pv90 13.300
alfa 10.000
FLAGS
n n
in n
dp y
hs nn
fn 65536
DISPLAY
-0.1
4796.9
806.6
0
81.1
0
0
249
0
148
3

```

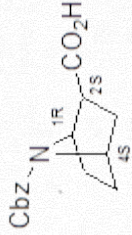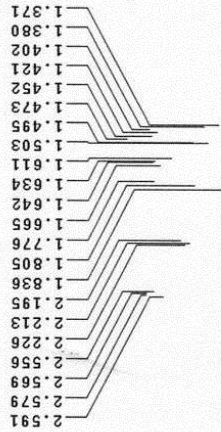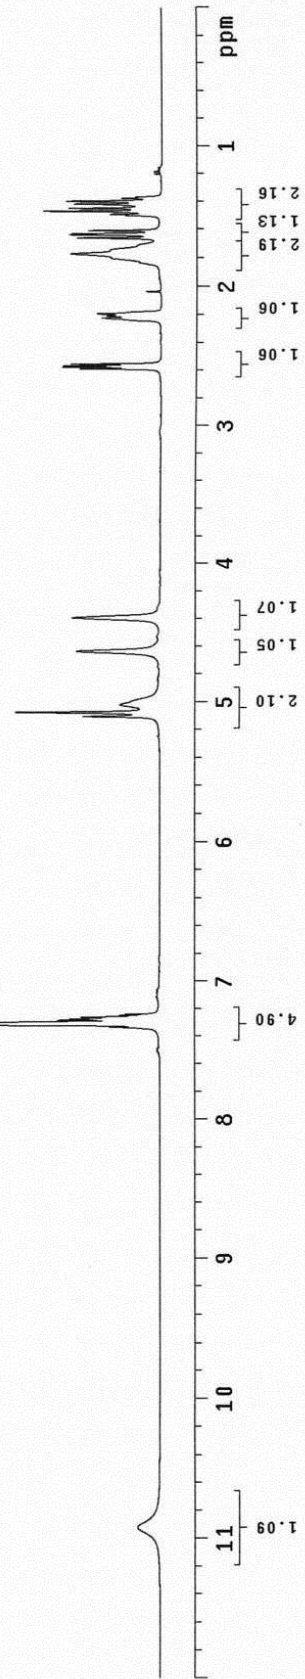

3 <sup>13</sup>C NMR

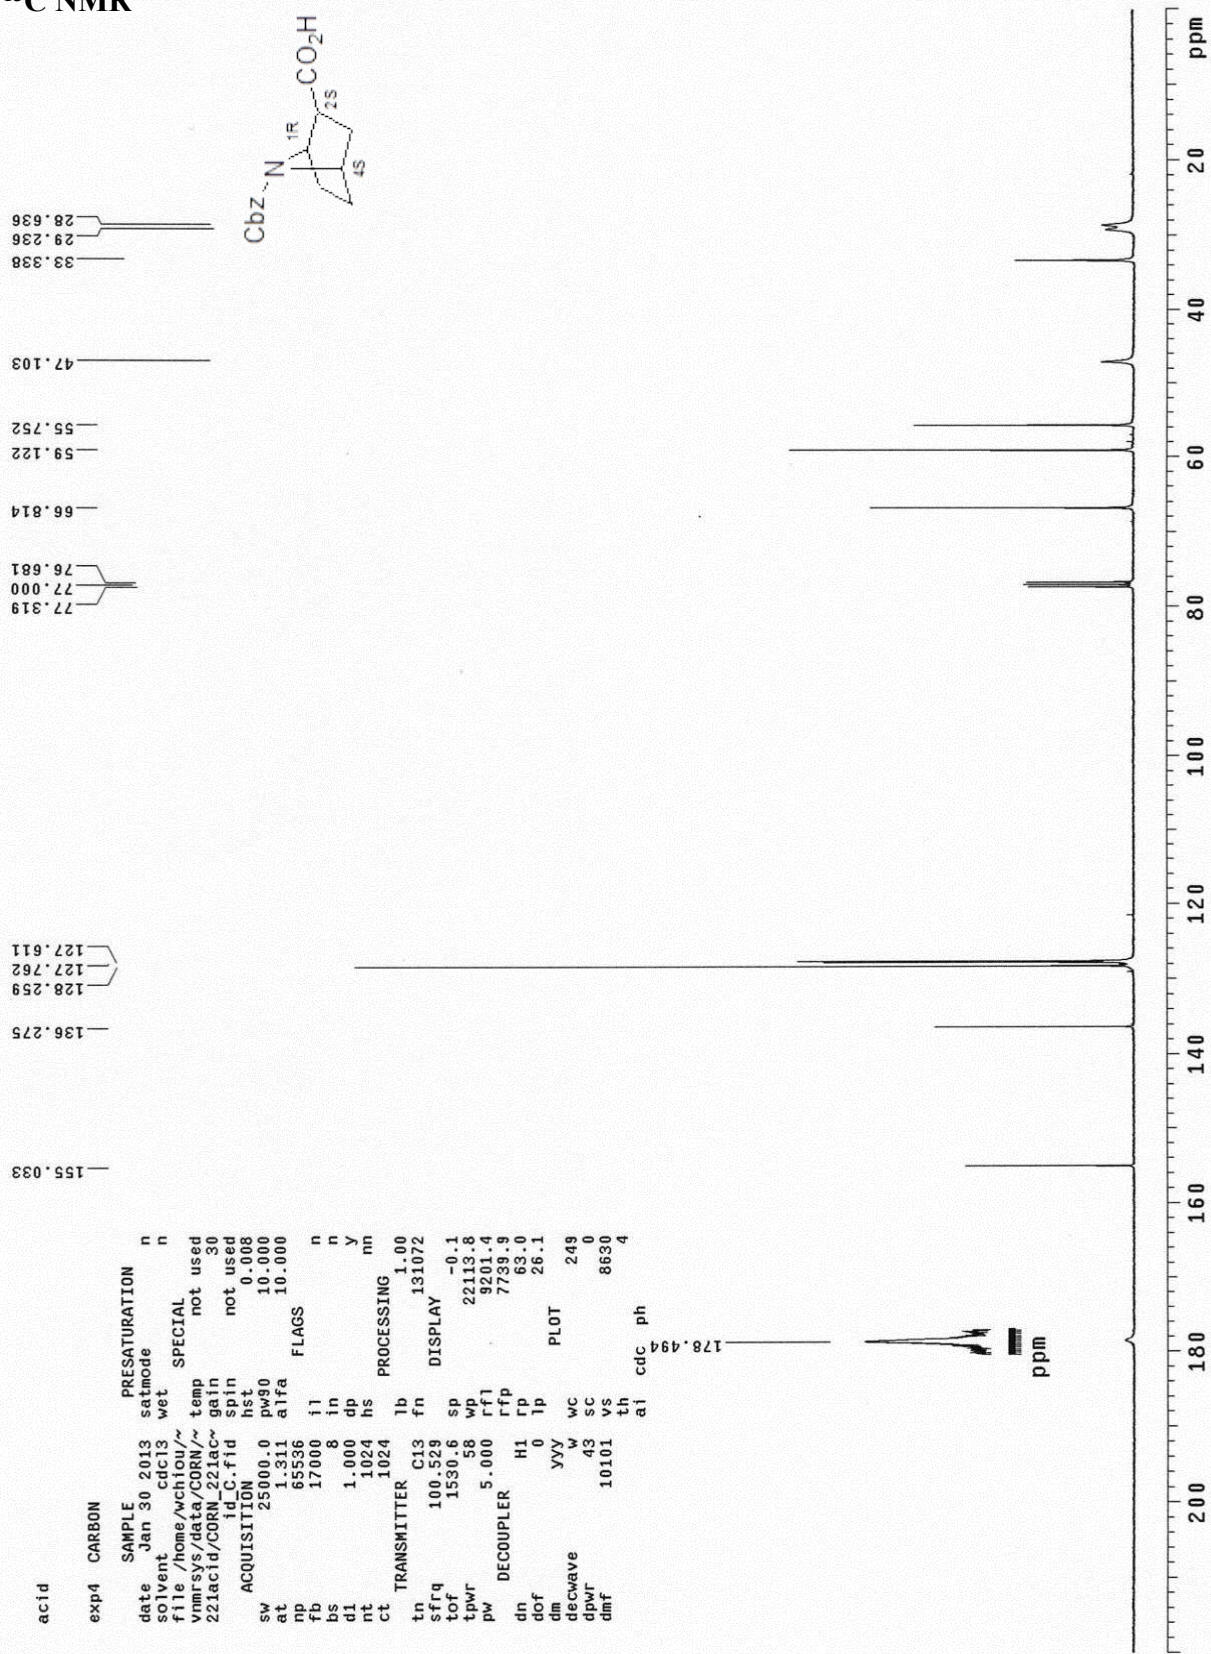

4a <sup>1</sup>H NMR

10d\_benzyl  
 exp51 PROTON  
 date May 23 2013  
 solvent cdc13  
 file /home/wch1ou/~  
 vnmrsw/data/CORN/~  
 10d\_benzyl/CORN\_10~  
 d\_benzyl\_H.fid  
 ACQUISITION  
 sw 6410.3  
 at 2.556  
 np 32768  
 fb 4000  
 bs 4  
 d1 1.000  
 nt 128  
 ct TRANSMITTER 16  
 tn H1  
 sffrq 399.756  
 tof 399.7  
 tpwr 60  
 pw 6.650  
 dn dof 0  
 dm nnn  
 decwave W40\_4nuc  
 dprf 97  
 dmf 29412  
 PRESATURATION  
 satmode  
 SPECIAL  
 gain  
 spin  
 hst  
 pw90  
 alfa  
 il  
 in  
 dp  
 hs  
 fn  
 H1  
 sp  
 wp  
 rf1  
 rfp  
 rp  
 lp  
 WC  
 SC  
 VS  
 th  
 al  
 not used  
 not used  
 0.008  
 13.300  
 10.000  
 n  
 n  
 y  
 n  
 n  
 65536  
 DISPLAY  
 -200.0  
 4197.3  
 806.6  
 0  
 -87.4  
 0  
 249  
 640  
 4  
 PLOT  
 ph

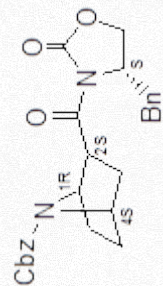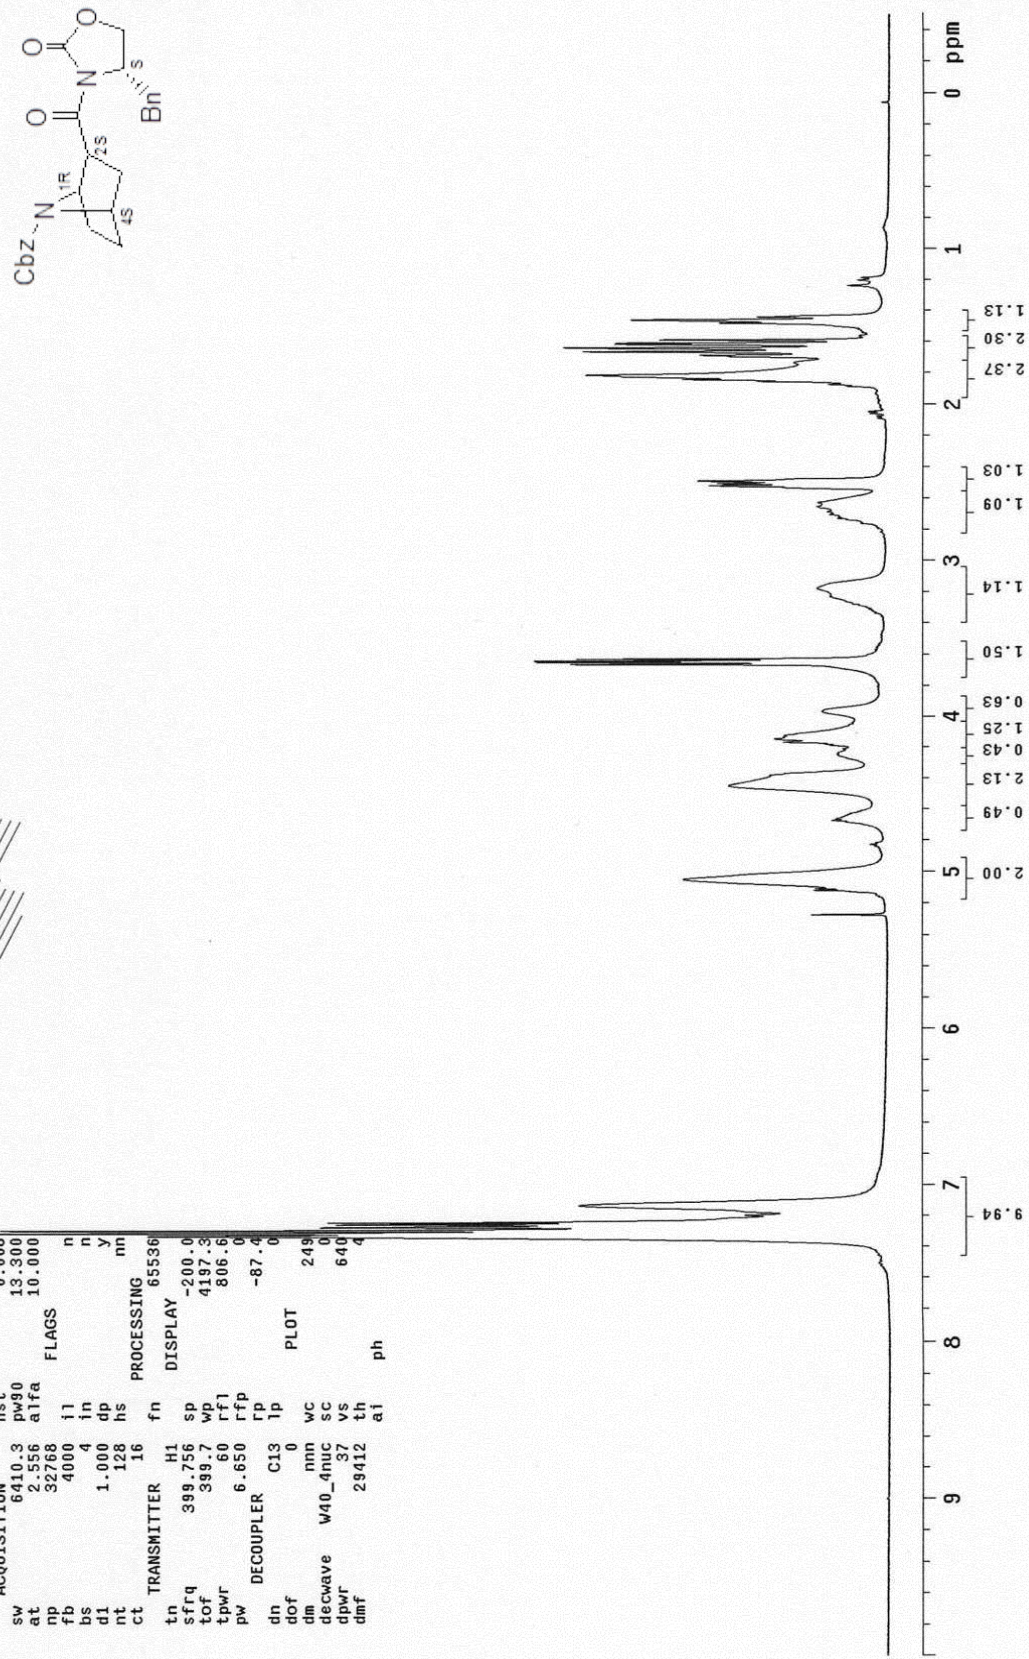

4a <sup>13</sup>C NMR

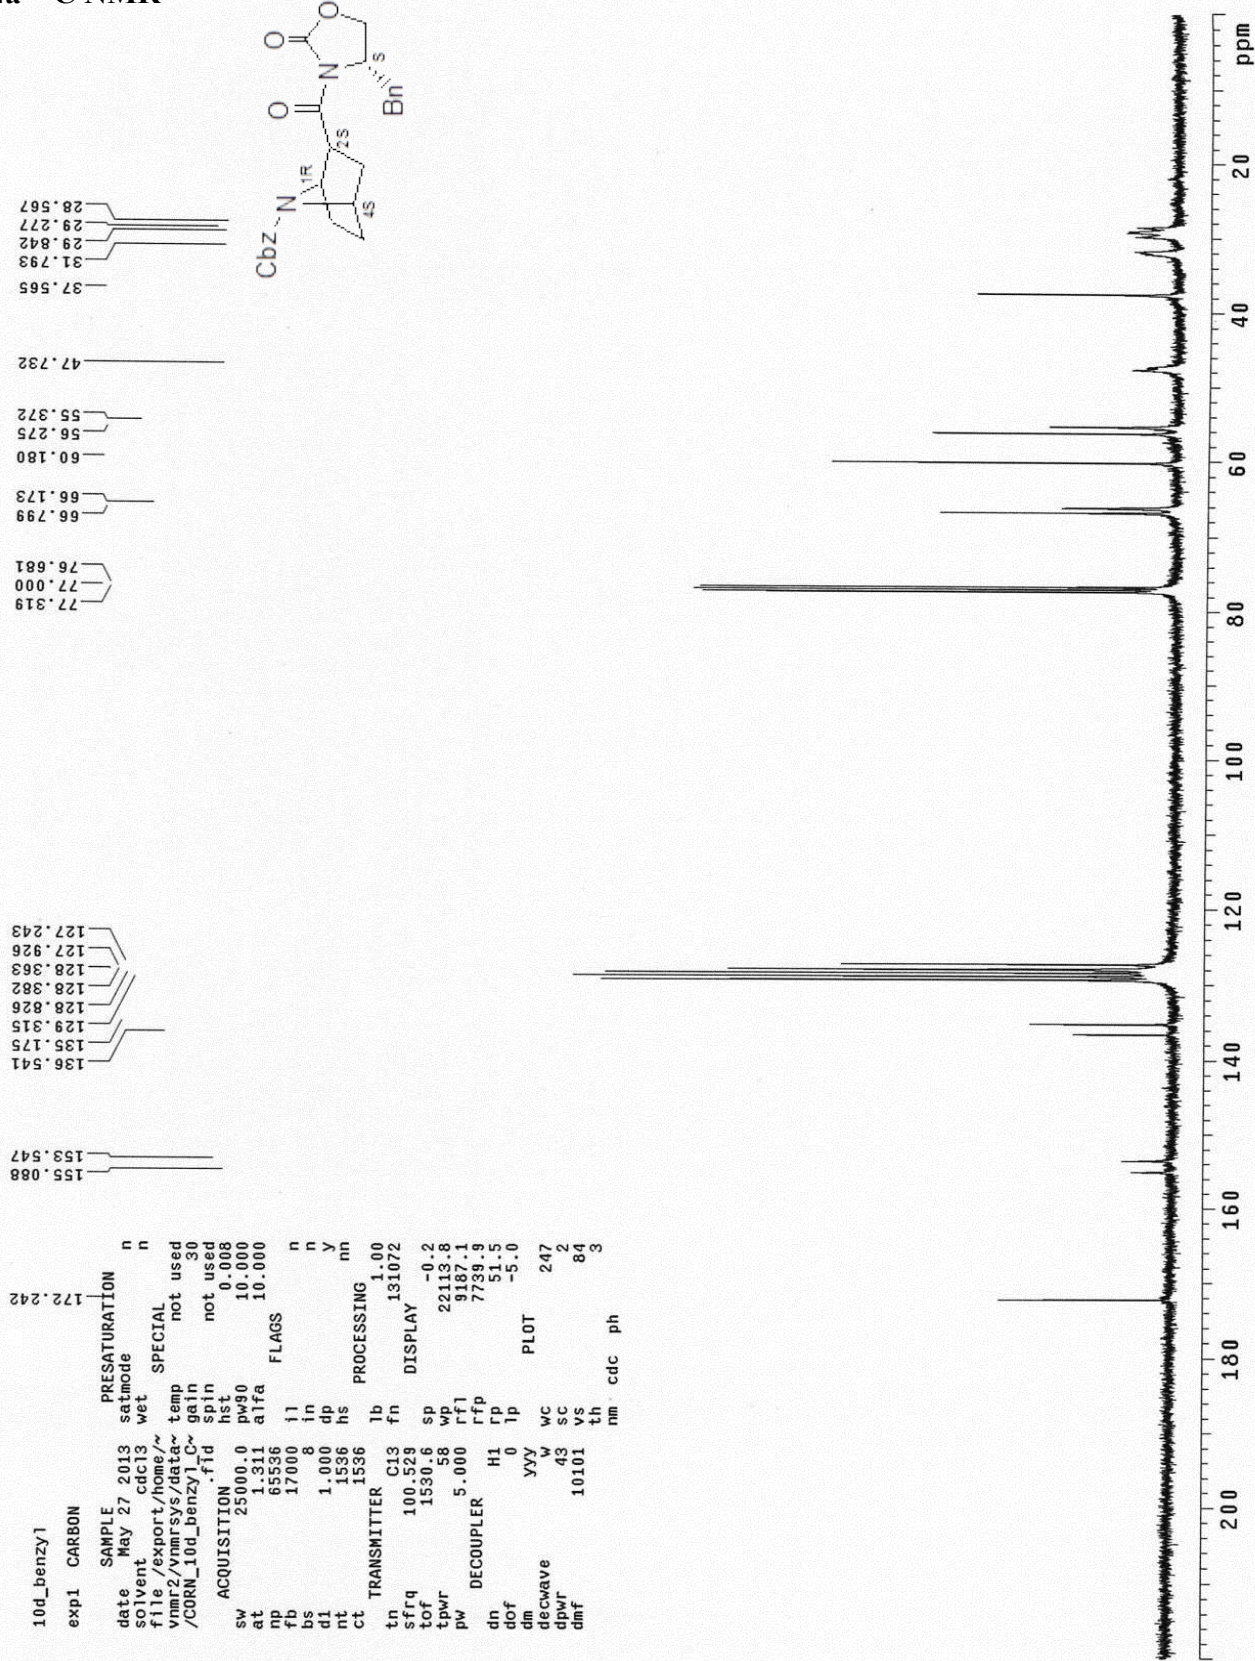

4b <sup>1</sup>H NMR

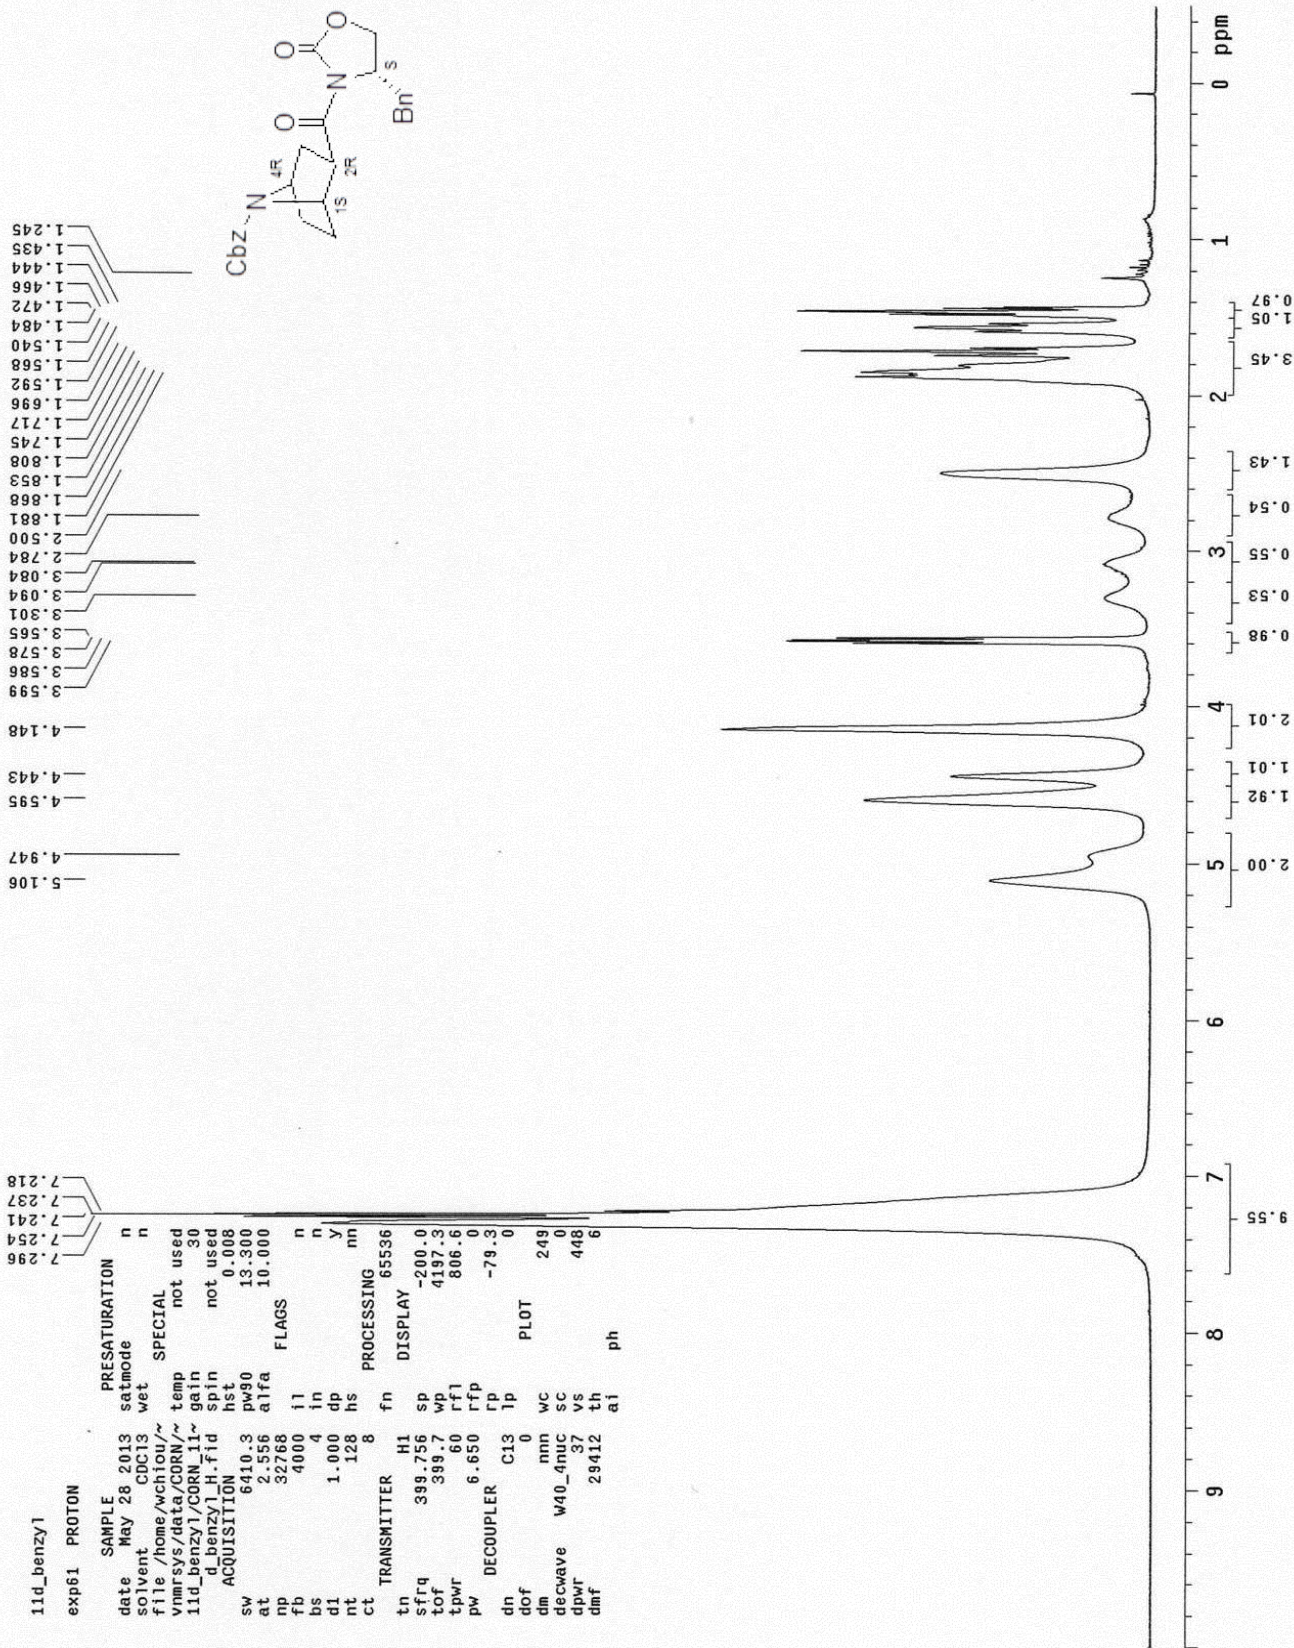

4b <sup>13</sup>C NMR

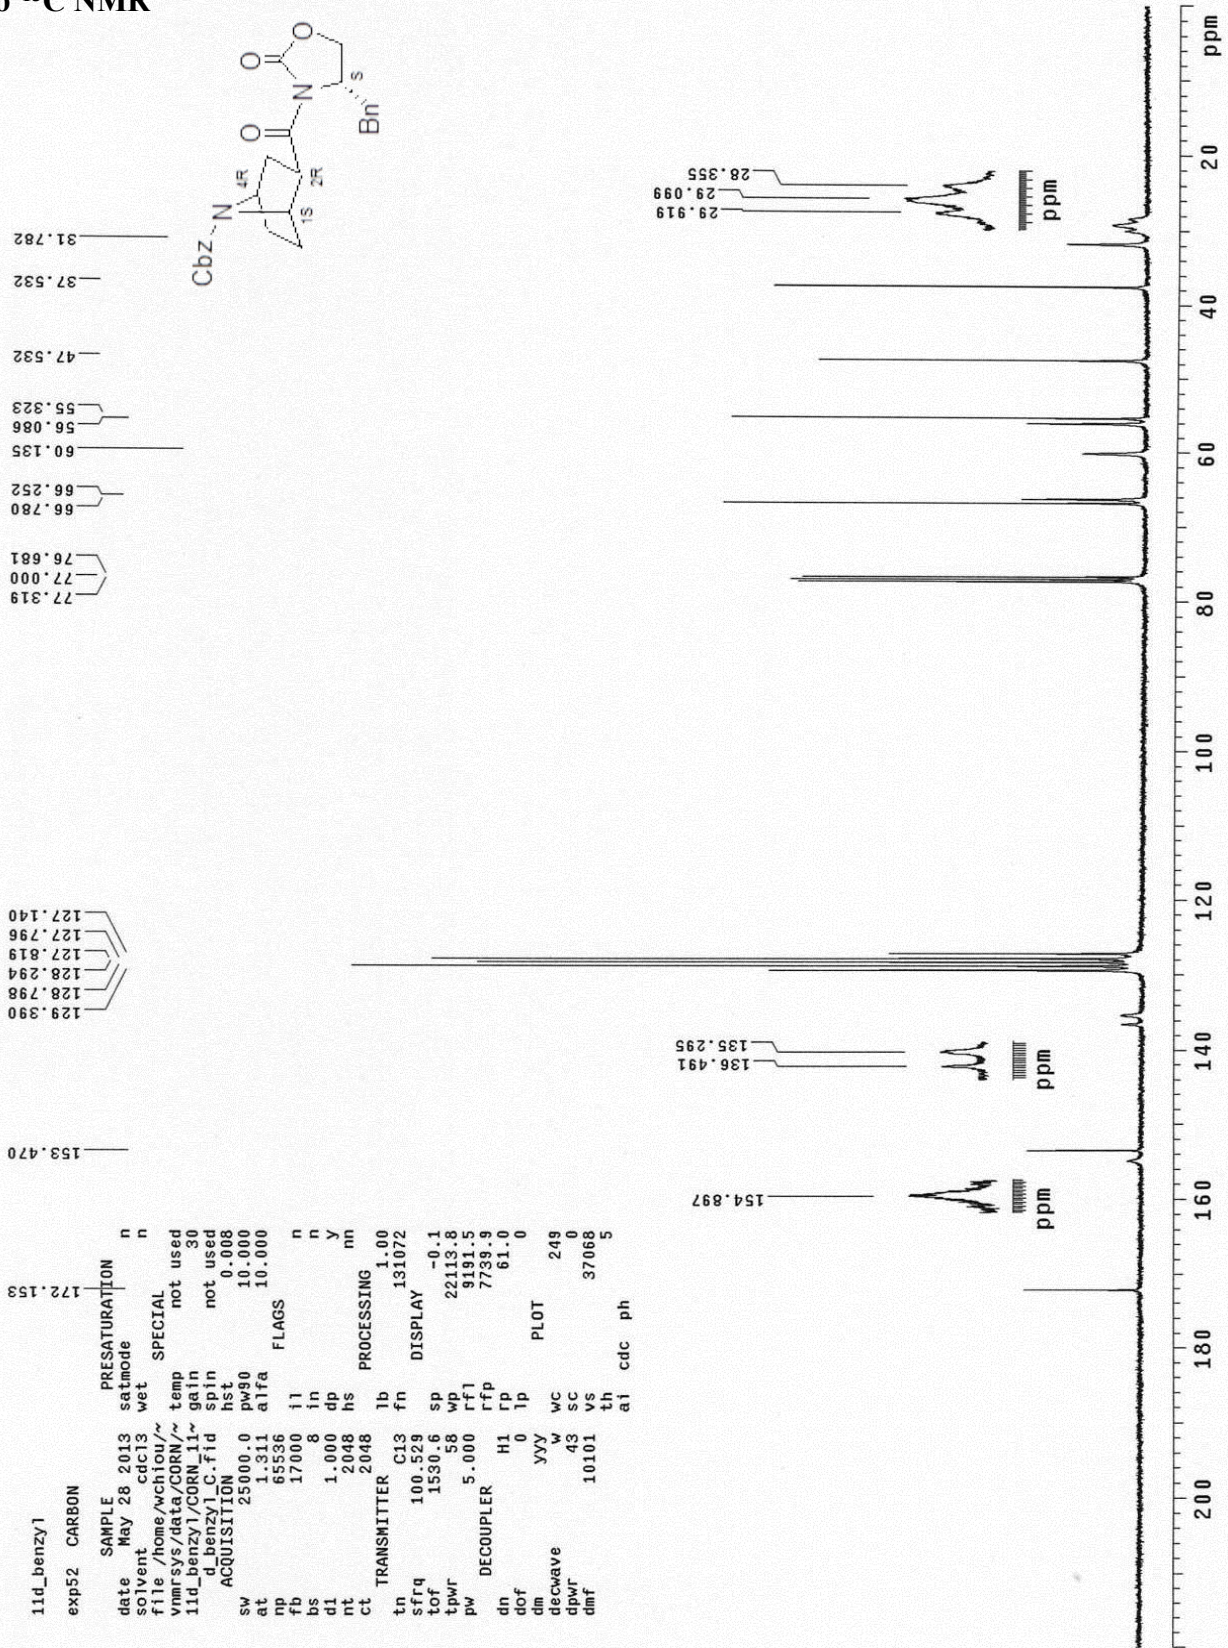

5 <sup>1</sup>H NMR

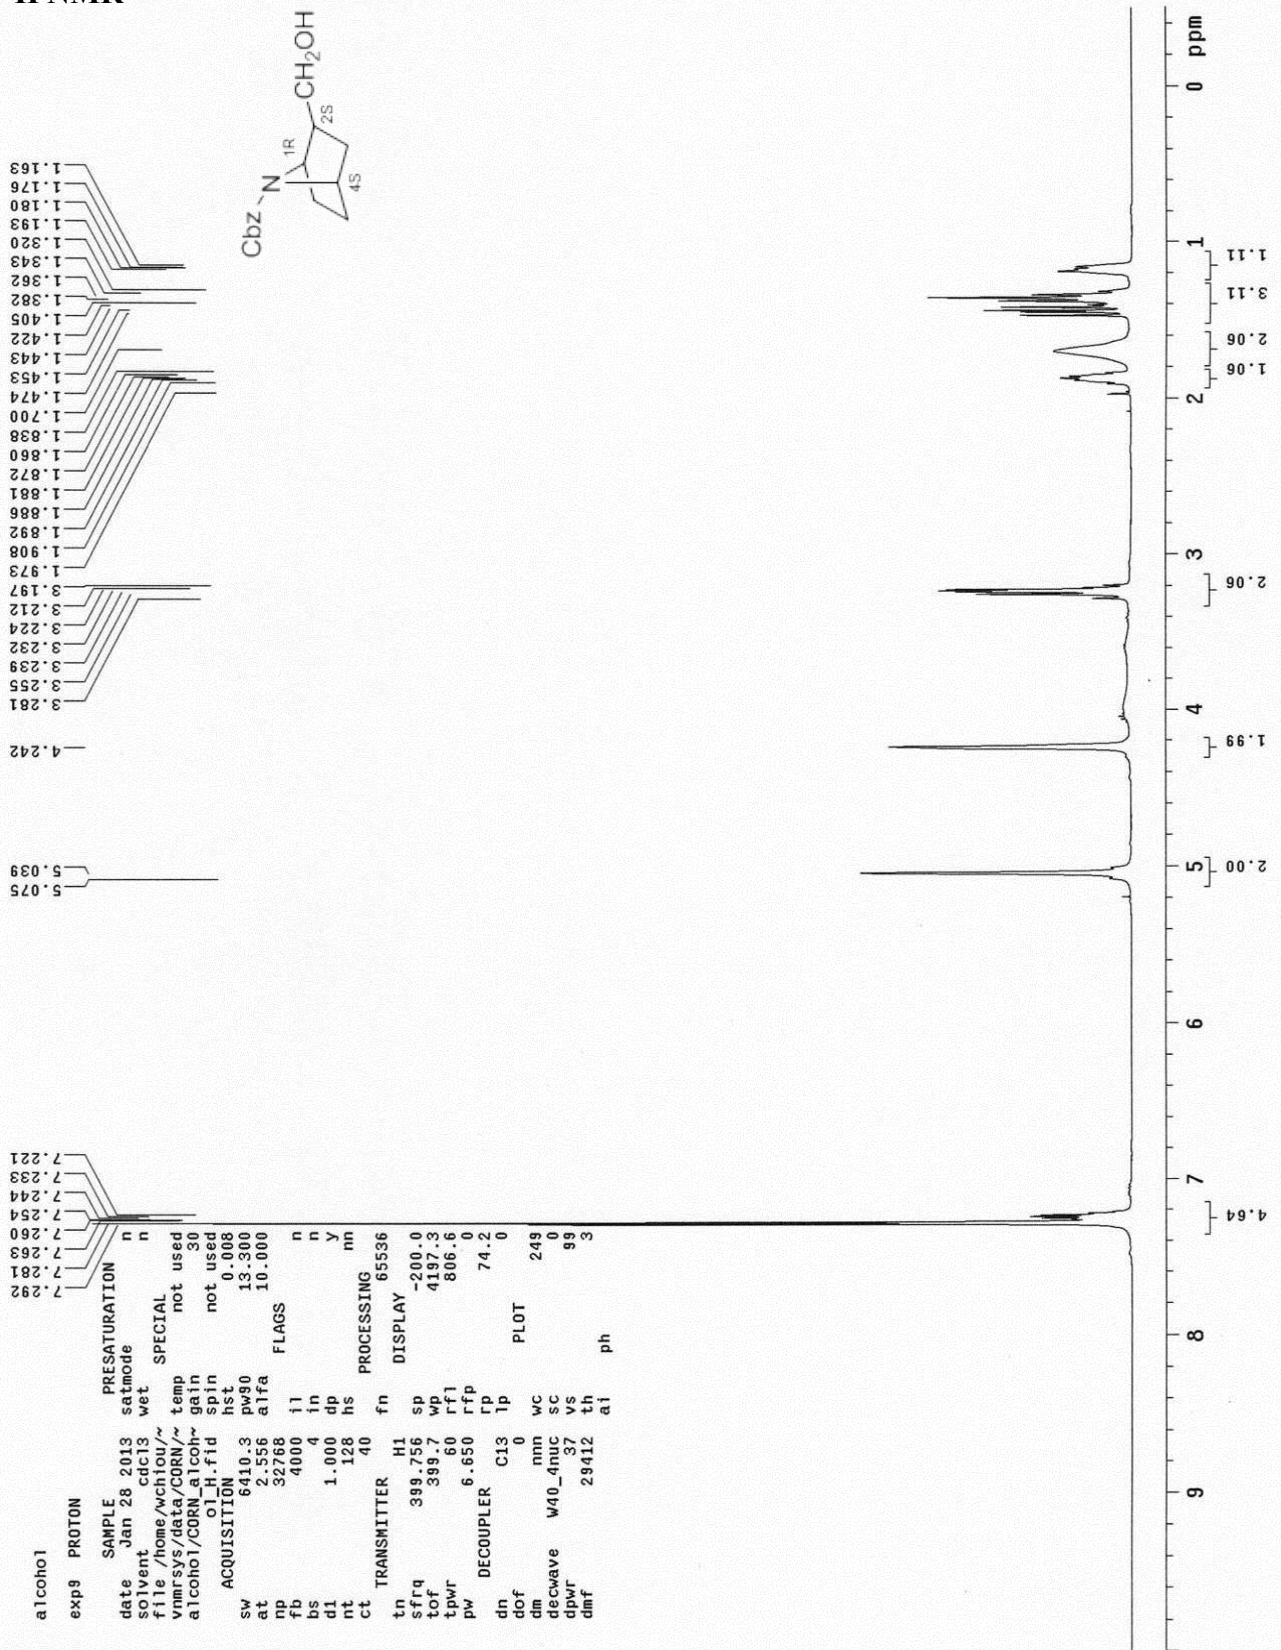



5 <sup>13</sup>C NMR

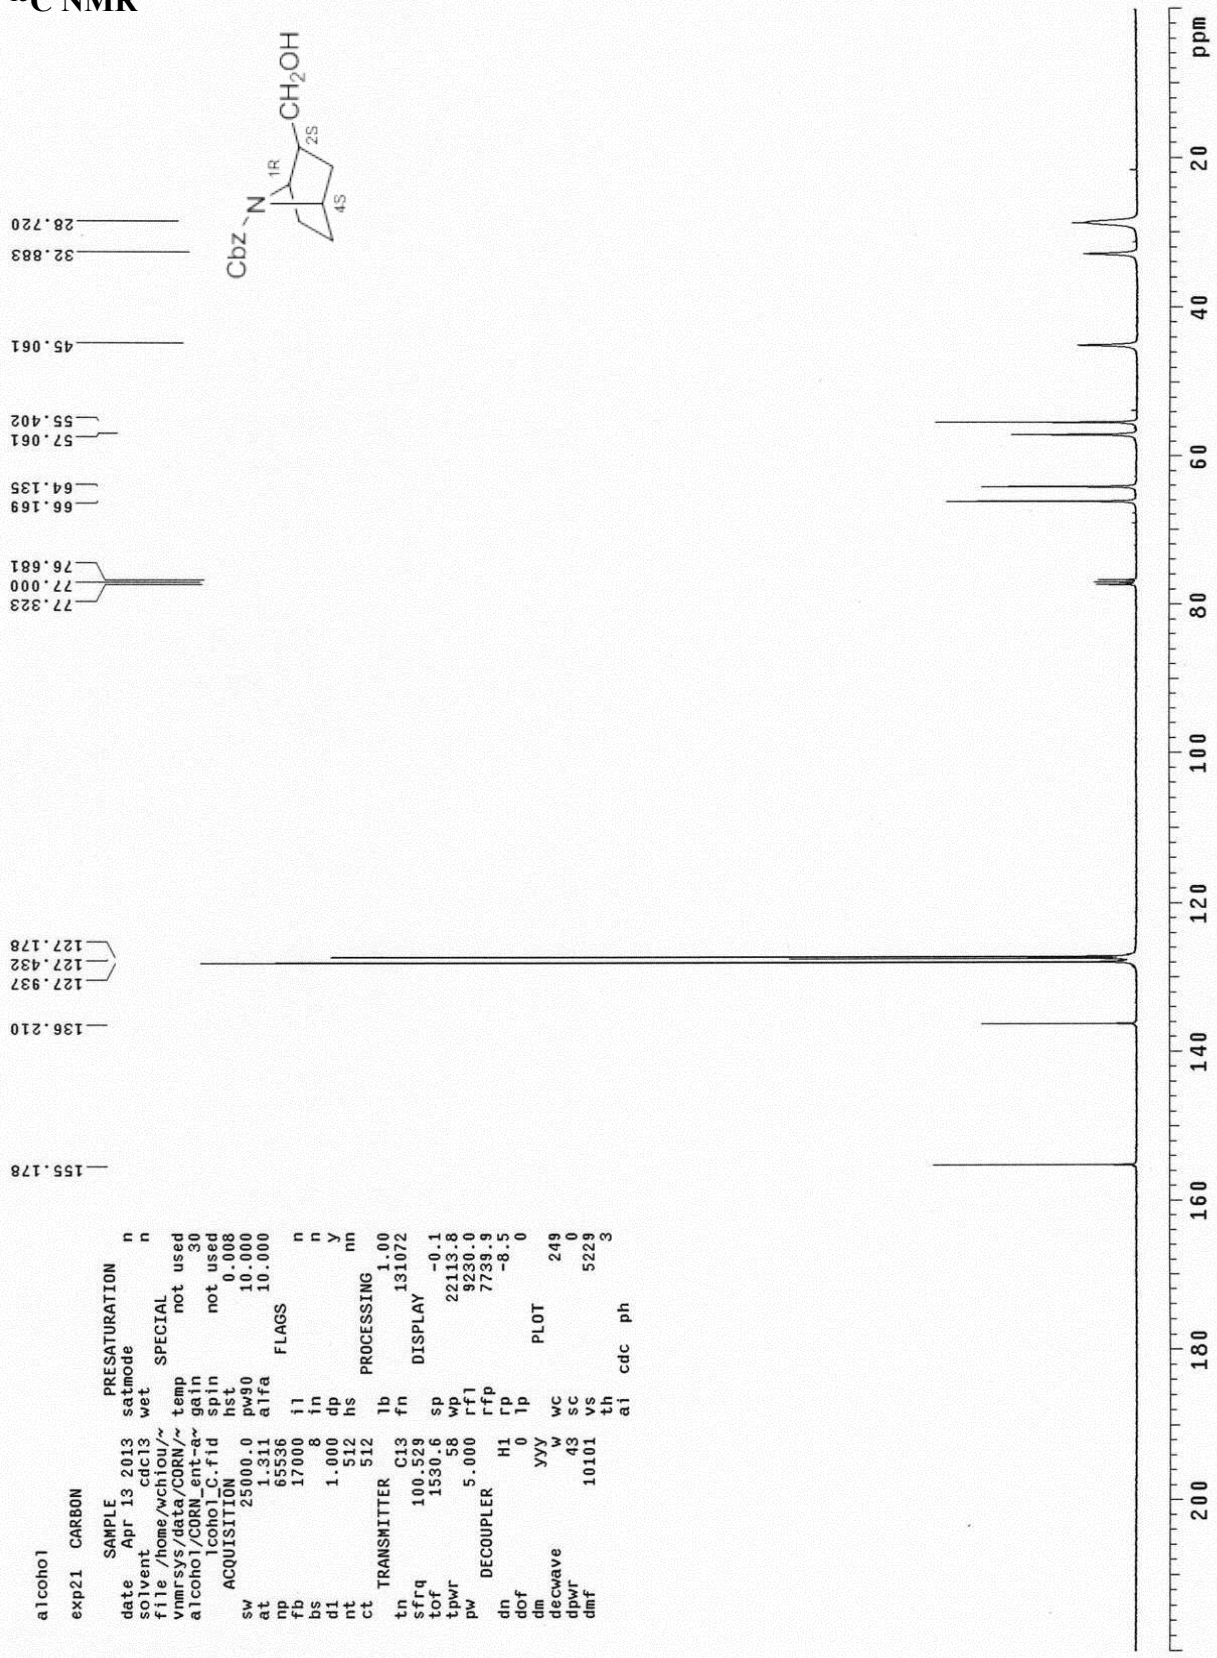

```

alcohol
exp21 CARBON
SAMPLE PRESATURATION
date Apr 13 2013 satmode n
solvent cdc13 wet n
file /home/wchiou/~
nmrSYS/data/CORN/~ temp SPECIAL not used
alcohol/CORN_ent-a~ gain 30
lcohol_C.fid spin not used
ACQUISITION hst 0.008
sw 25000.0 pw90 10.000
at 1.311 alfa 10.000
np 65536 il FLAGS n
fb 17000 8 in n
bs 1.000 dp Y
nt 512 hs PROCESSING nm
ct 512 lb 1.00
tn TRANSMITTER C13 fn 131072
sfrq 100.529 DISPLAY -0.1
tof 1530.6 sp 22113.8
tpwr 58 wp 9230.0
pw 5.000 rfp 7739.9
DECOUPLER H1 rp -8.5
dn 0 lp 0
dm YVY WC PLOT 249
decwave W WC 0
dprf 43 SC 5229
dmf 10101 VS 3
al cdc ph
  
```

6 <sup>1</sup>H NMR

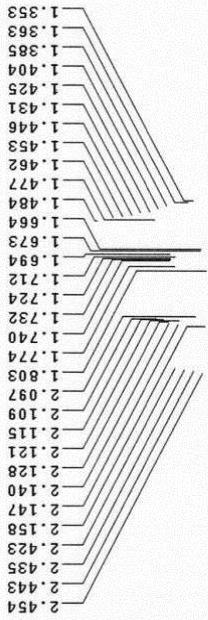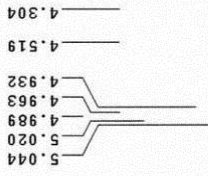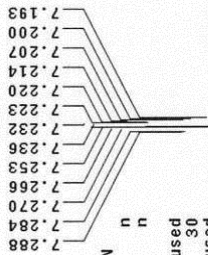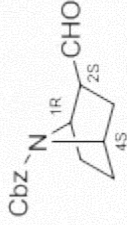

```

aldehyde
exp12 PROTON
date Nov 6 2012 satmode n
solvent cdc13 wet n
file /home/wchou/~
vnmrshs/data/CORN/~
aldehyde/CORN196_a~
aldehyde.H.fid spin
ACQUISITION hst 0.008
sw 6410.3 pw90 13.300
at 2.556 a1fa 10.000
np 32768
fb 4000 i1 n
bs 4 in n
di 1.000 dp y
nt 128 hs
ct TRANSMITTER I2 fn 65536
tn HI
sfrq 399.756 sp -0.1
tof 399.7 wp 4197.3
tpwr 60 rfl 806.6
pw 6.650 rfp 0
DECOUPLER C13 rp 89.5
dn 0 lp 0
dof 0 PLOT
dim nnn wc 249
deccave W40_4muc SC 0
dpwr 37 ss 96
dmf 29412 th 3
a1 ph
  
```

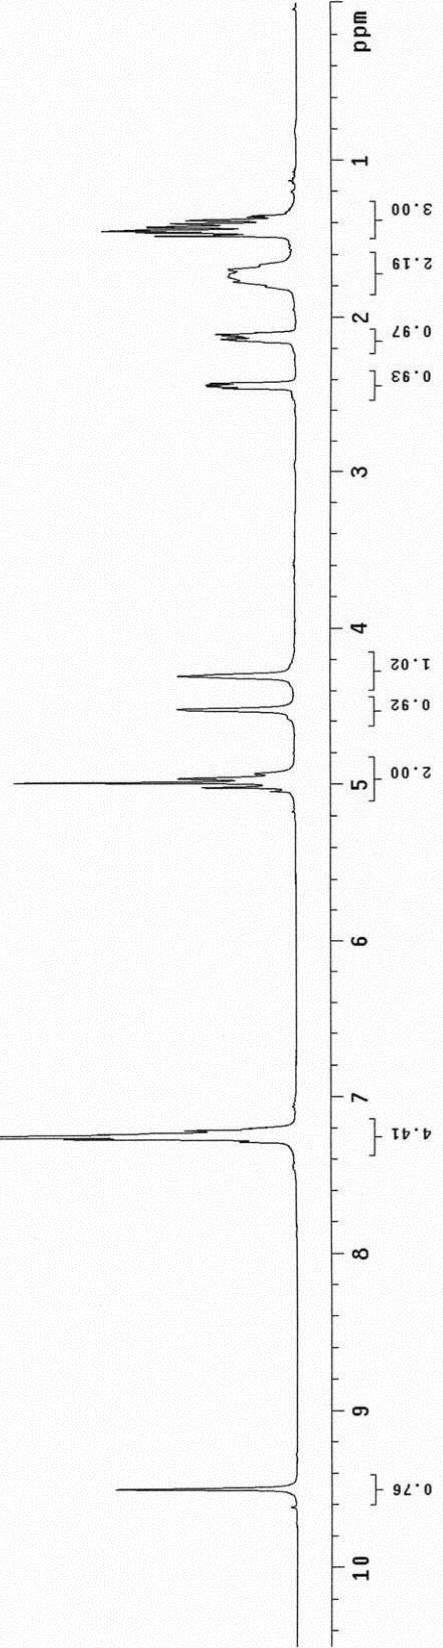

6 <sup>13</sup>C NMR

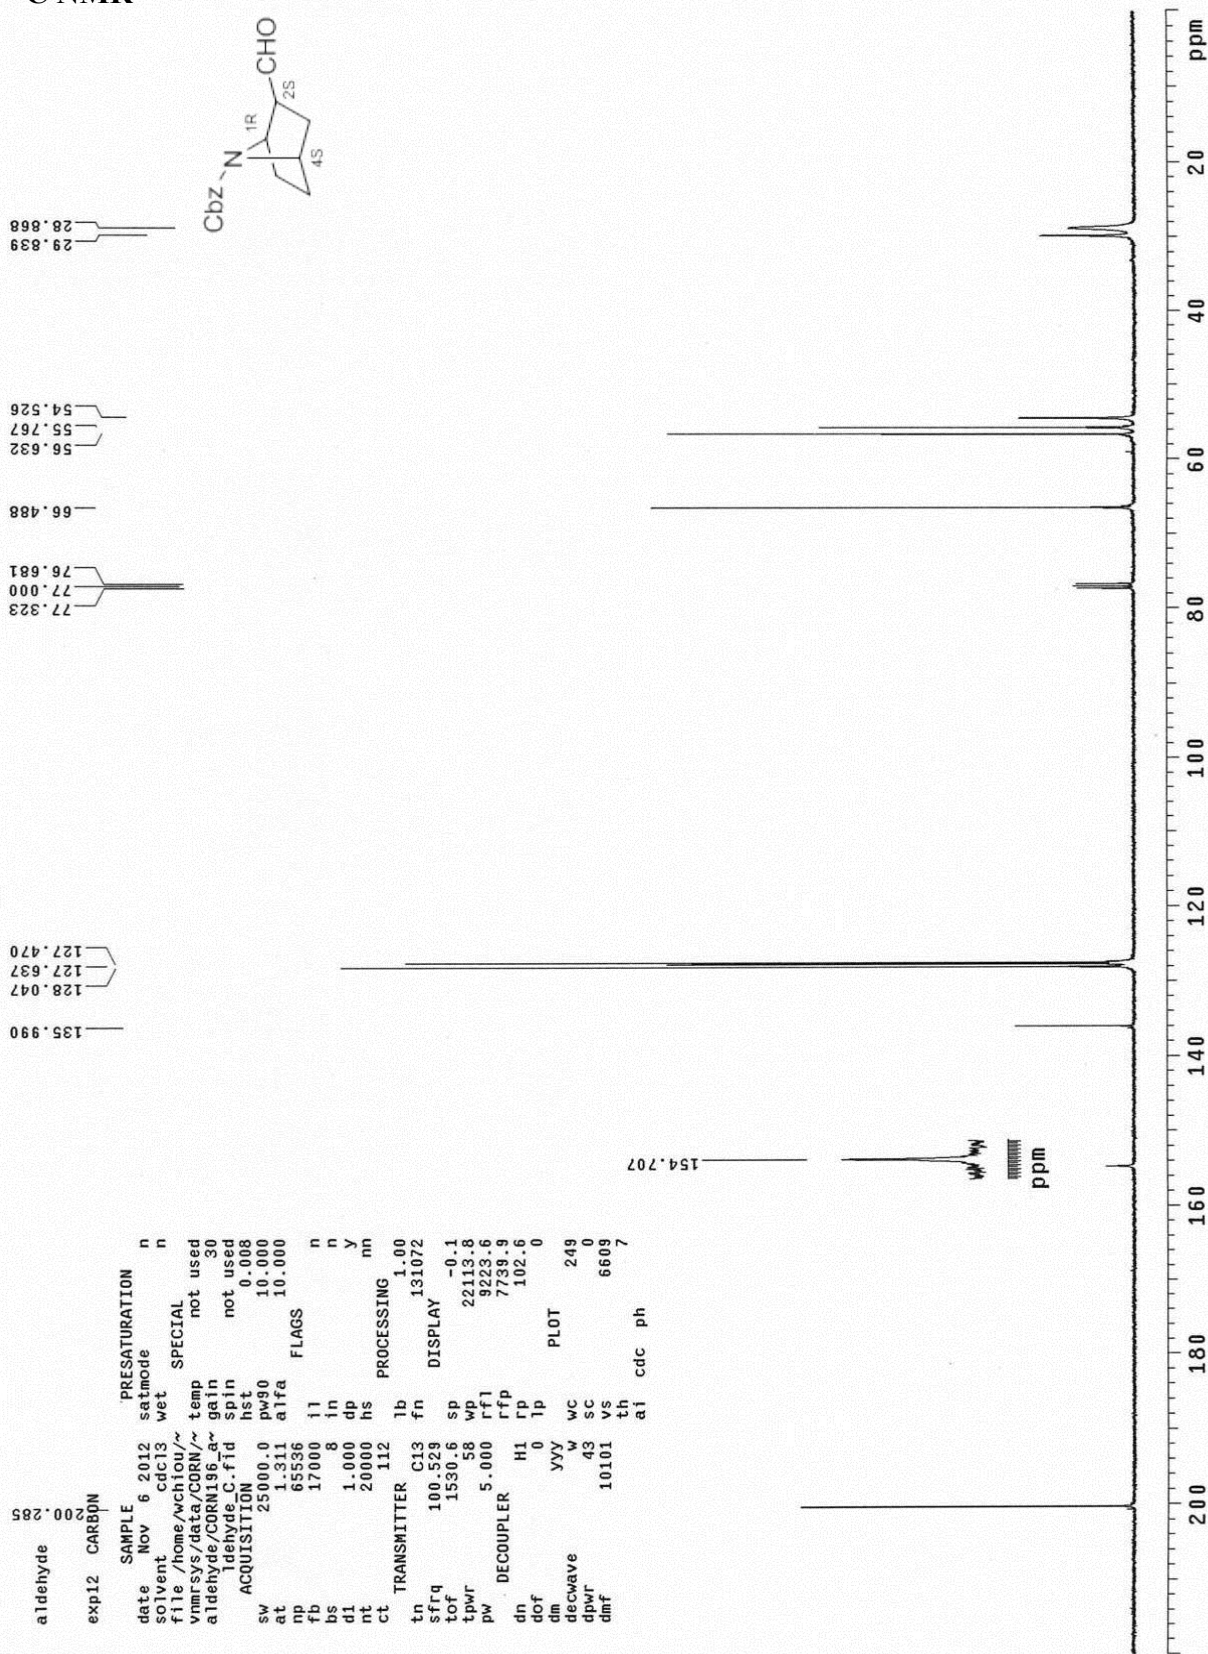

7 <sup>1</sup>H NMR

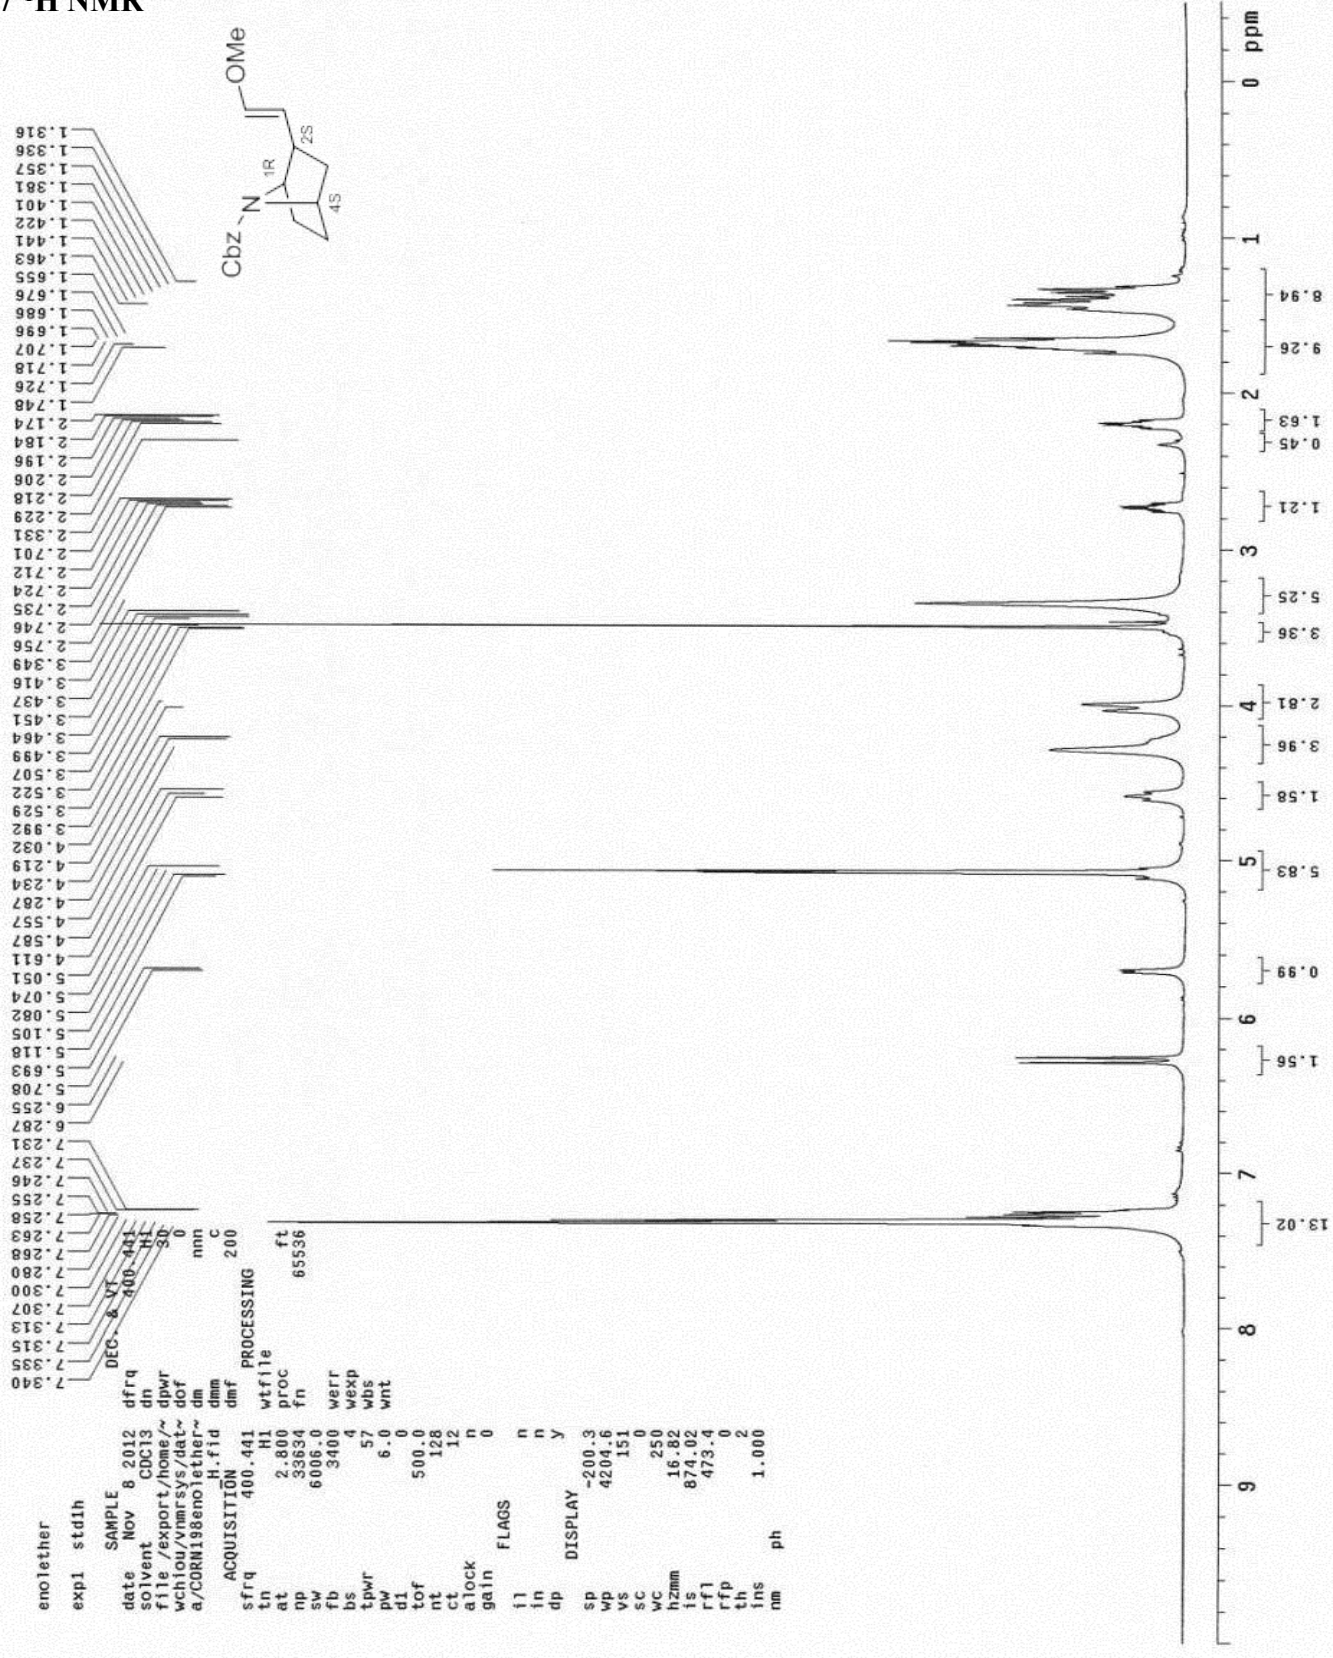

7 <sup>13</sup>C NMR

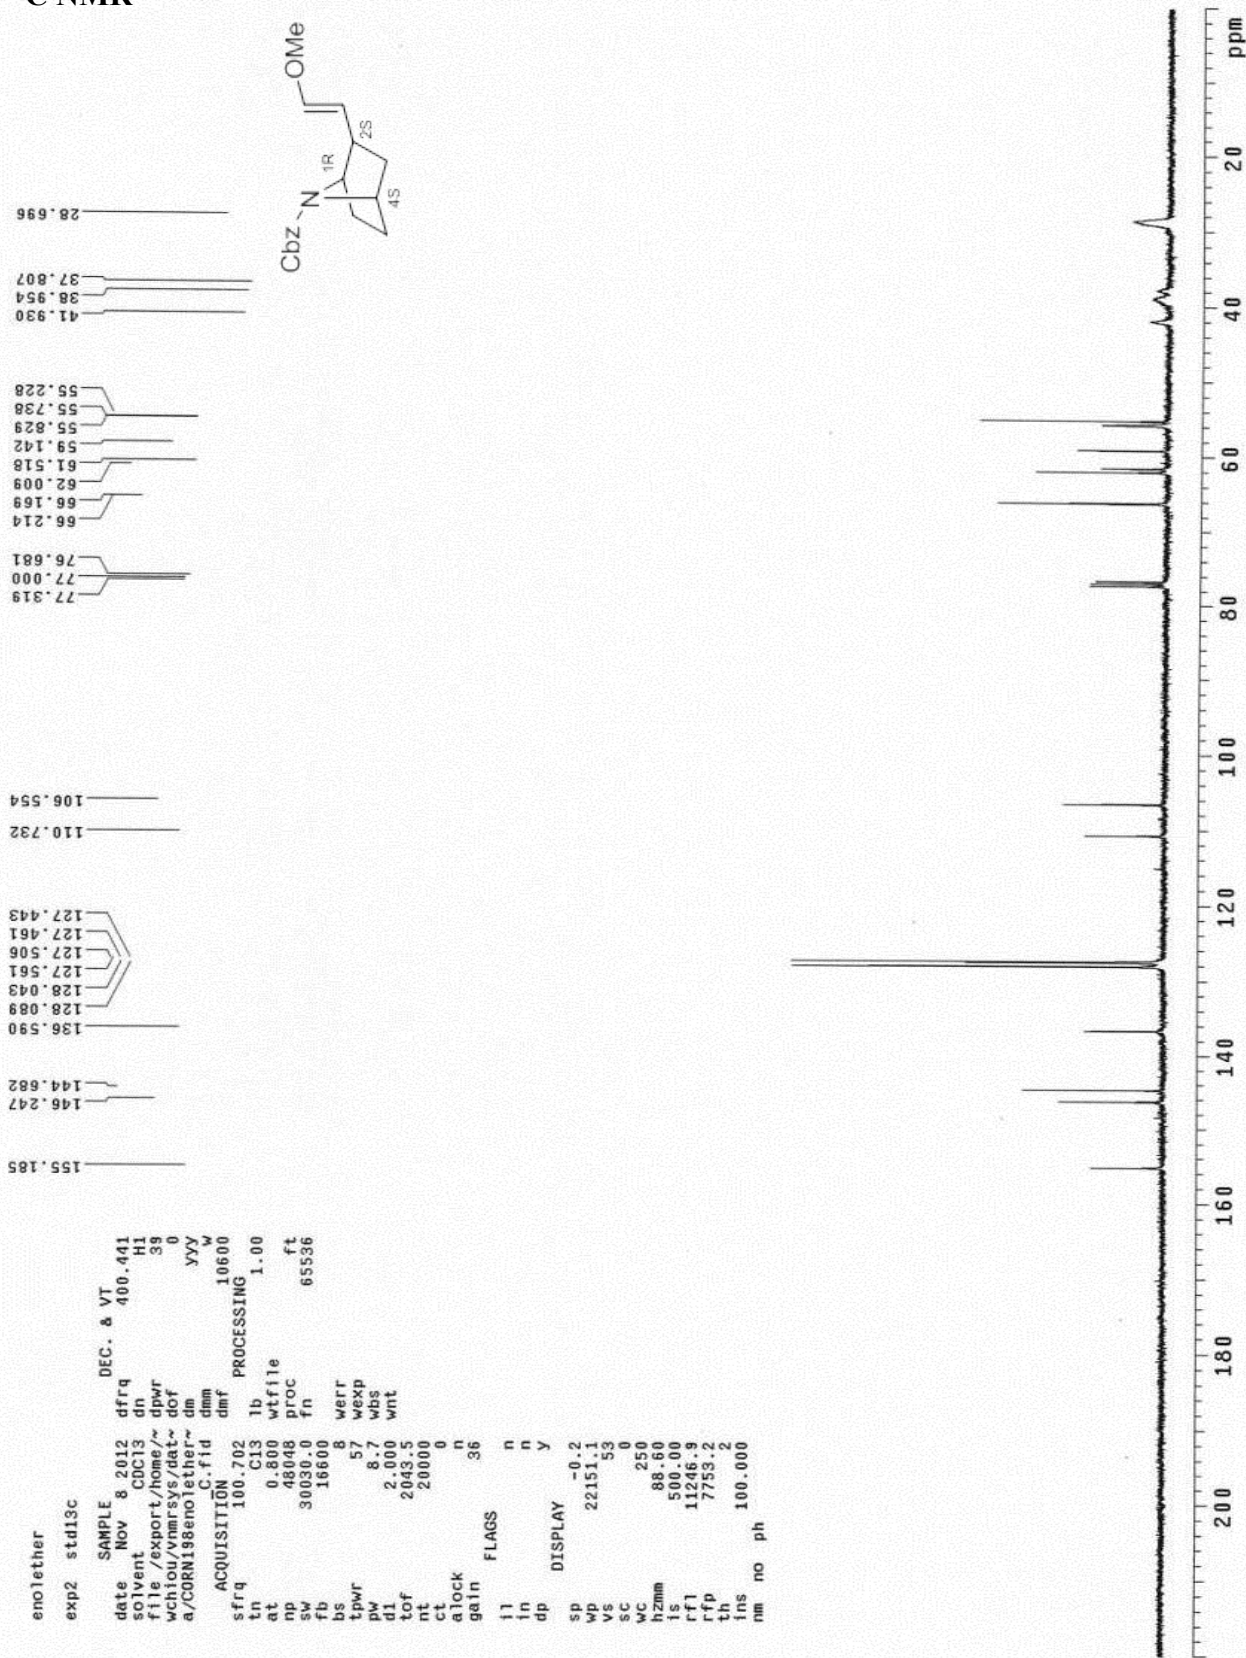

8 <sup>1</sup>H NMR

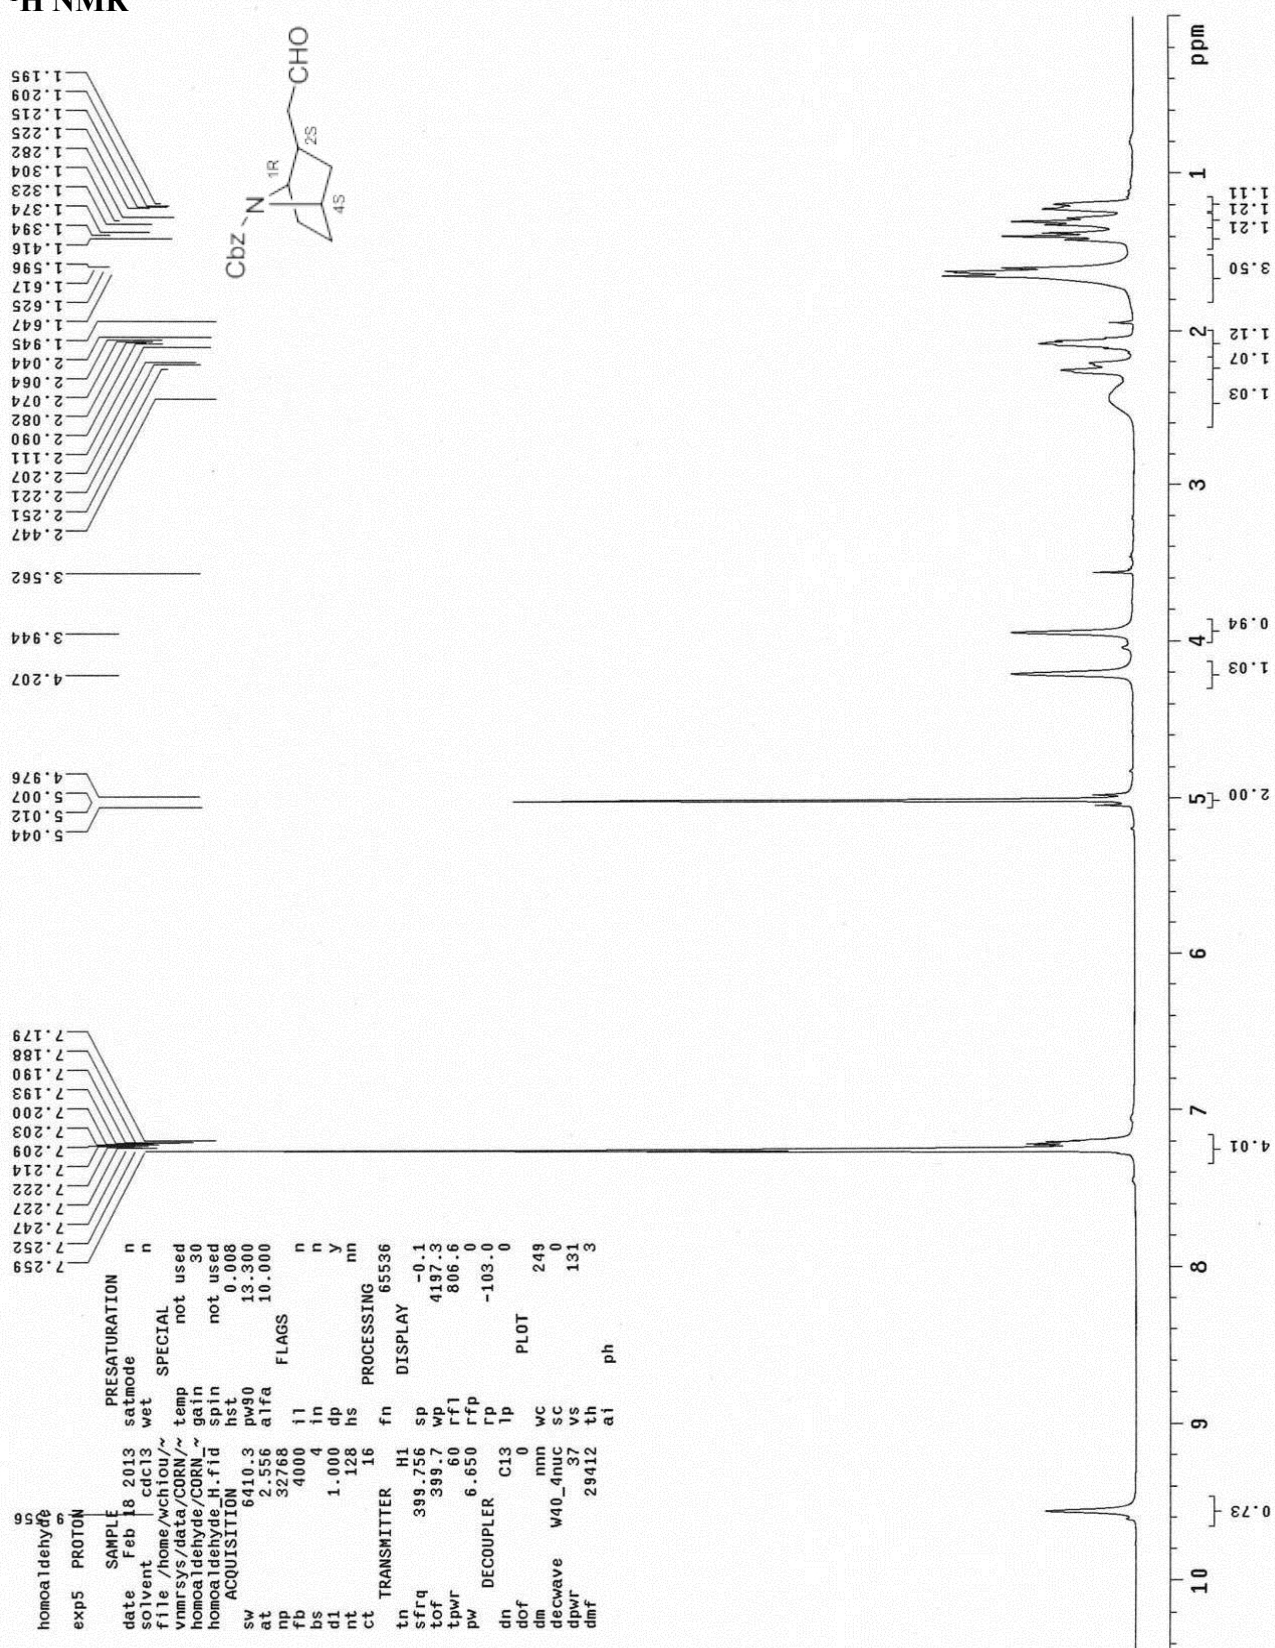

8 <sup>13</sup>C NMR

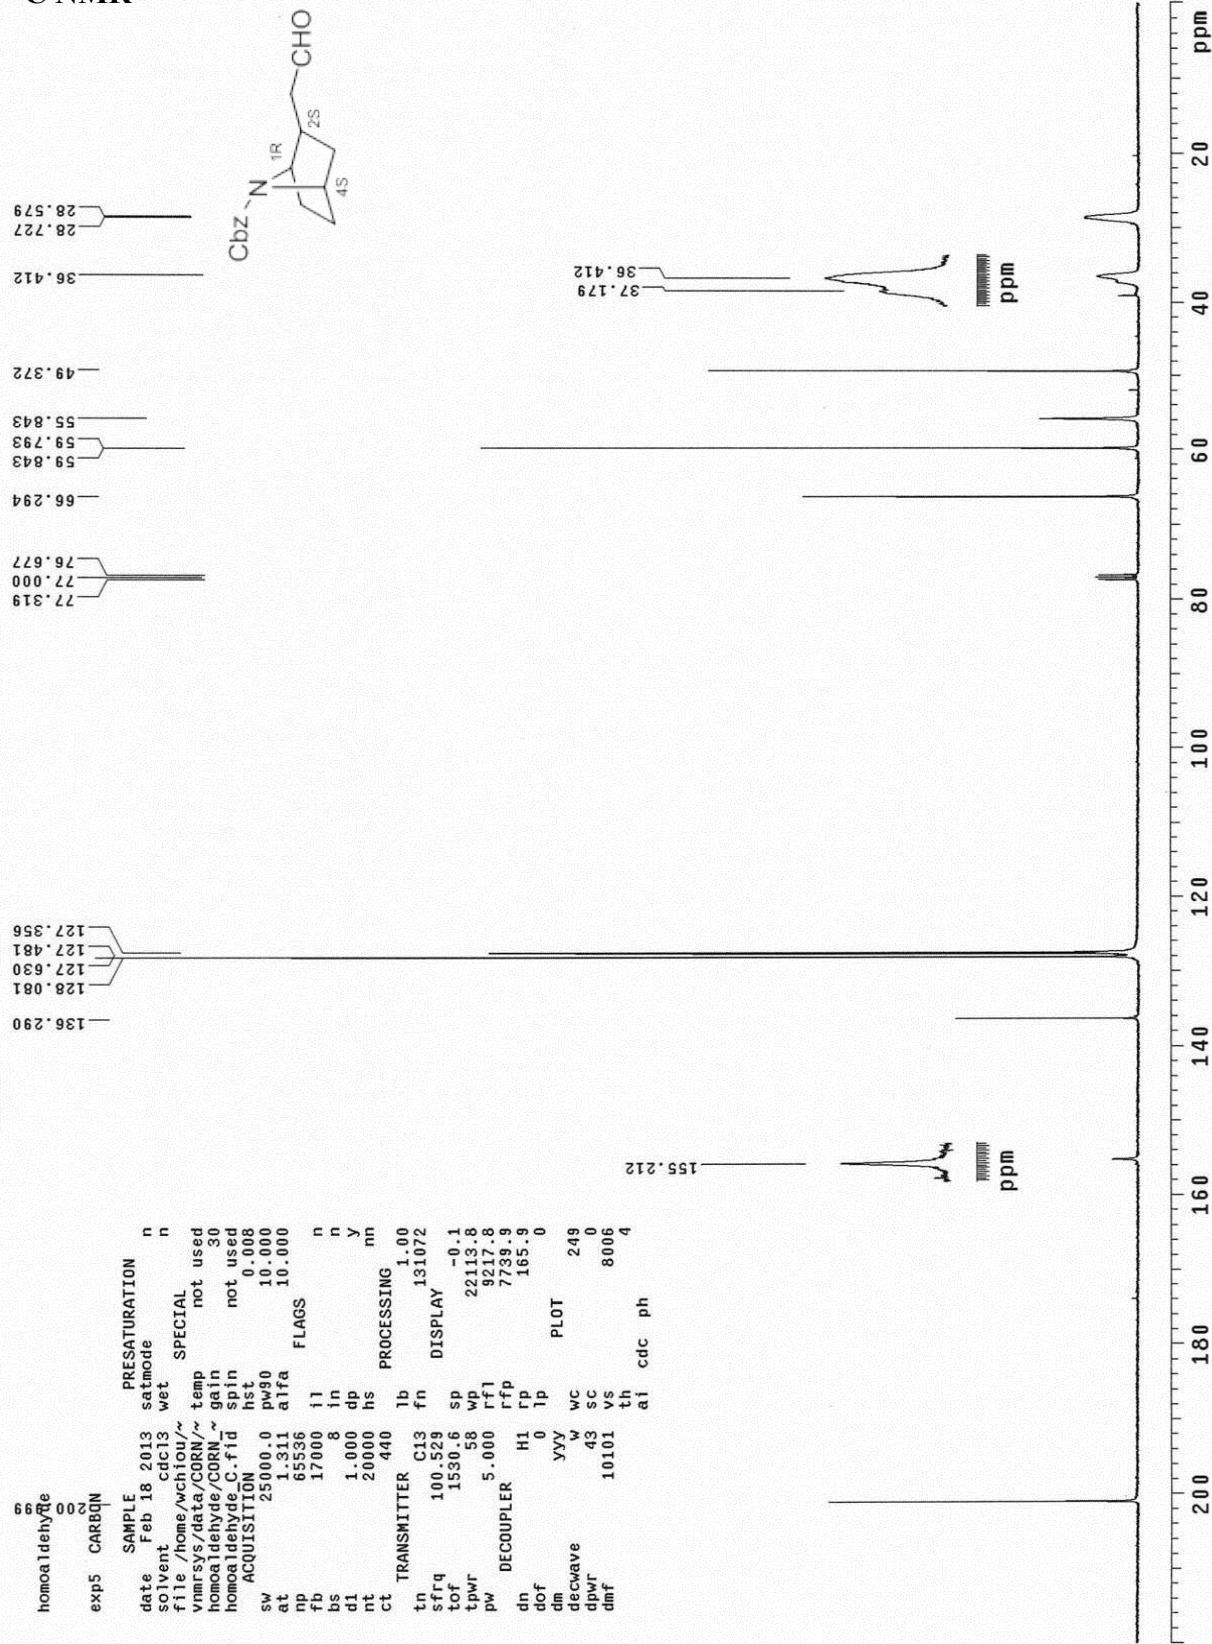

9 <sup>1</sup>H NMR

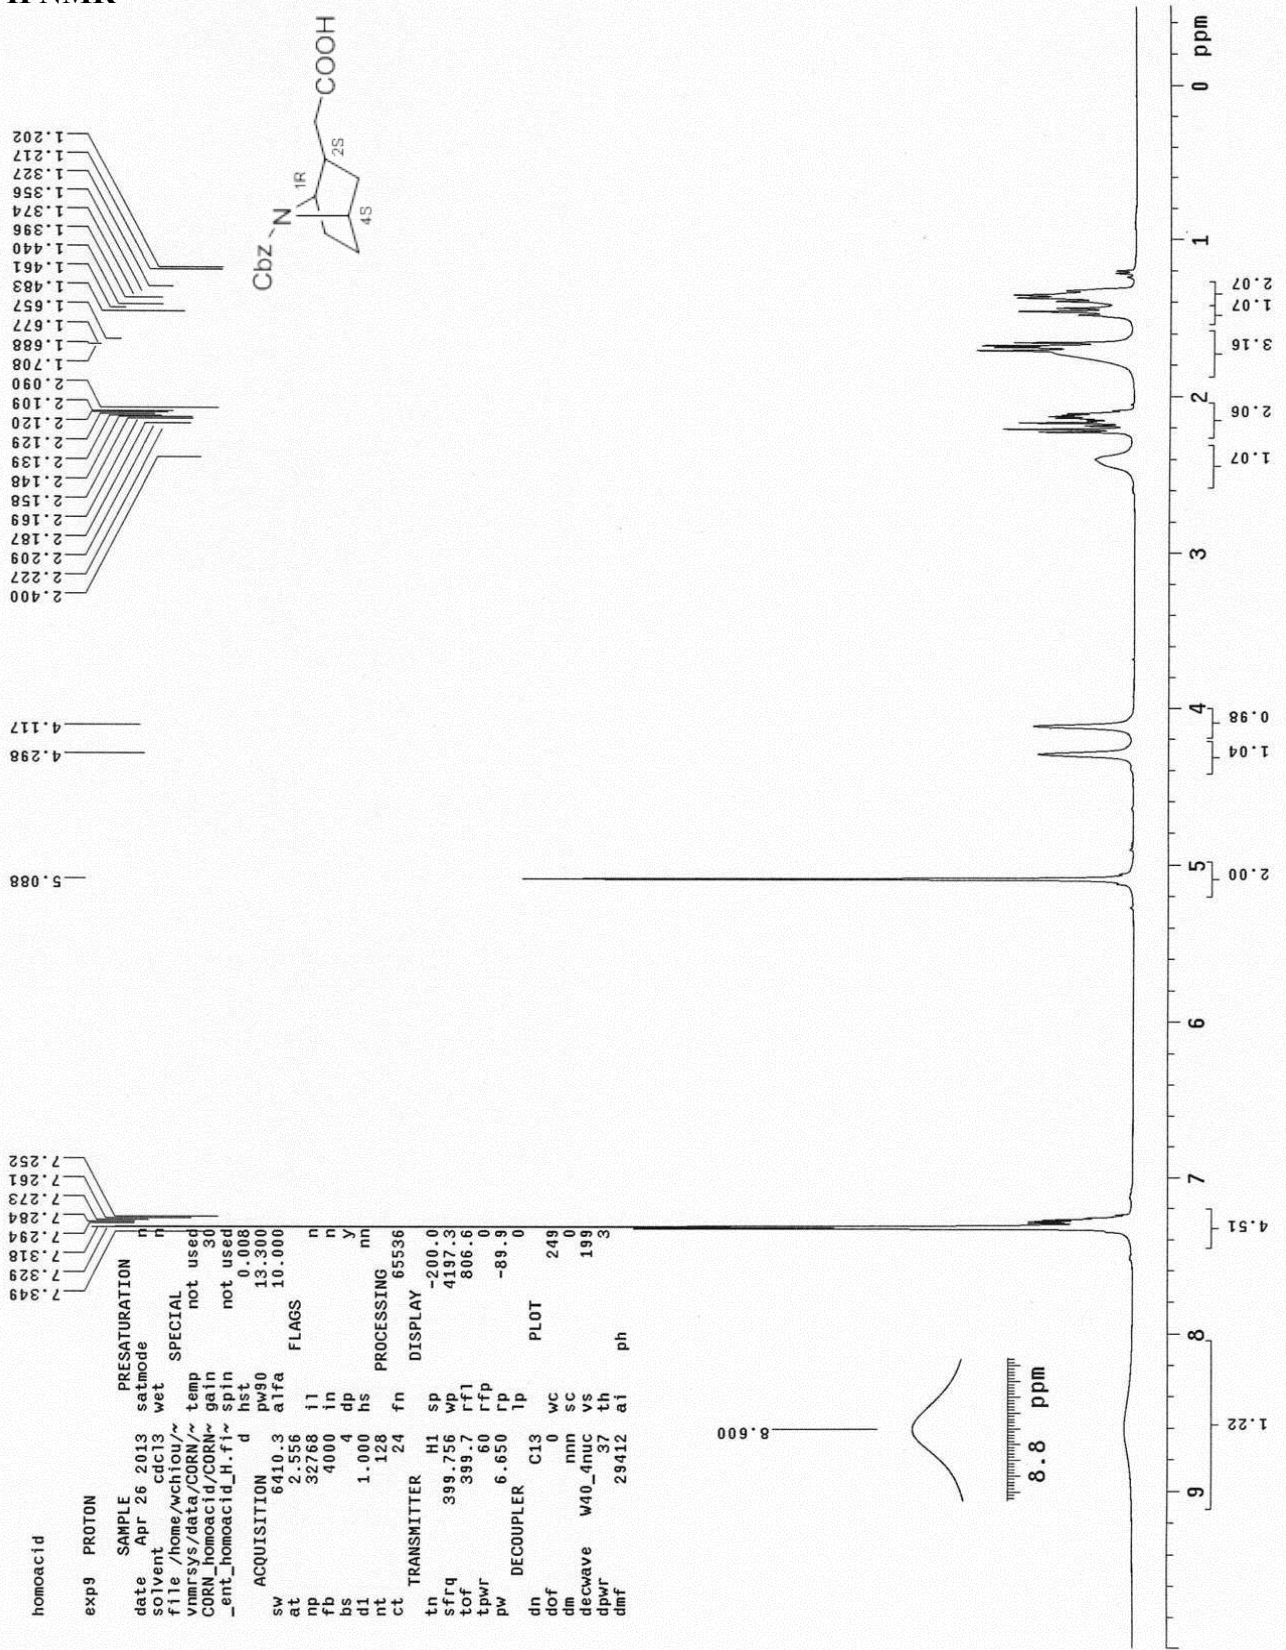



9 <sup>13</sup>C NMR

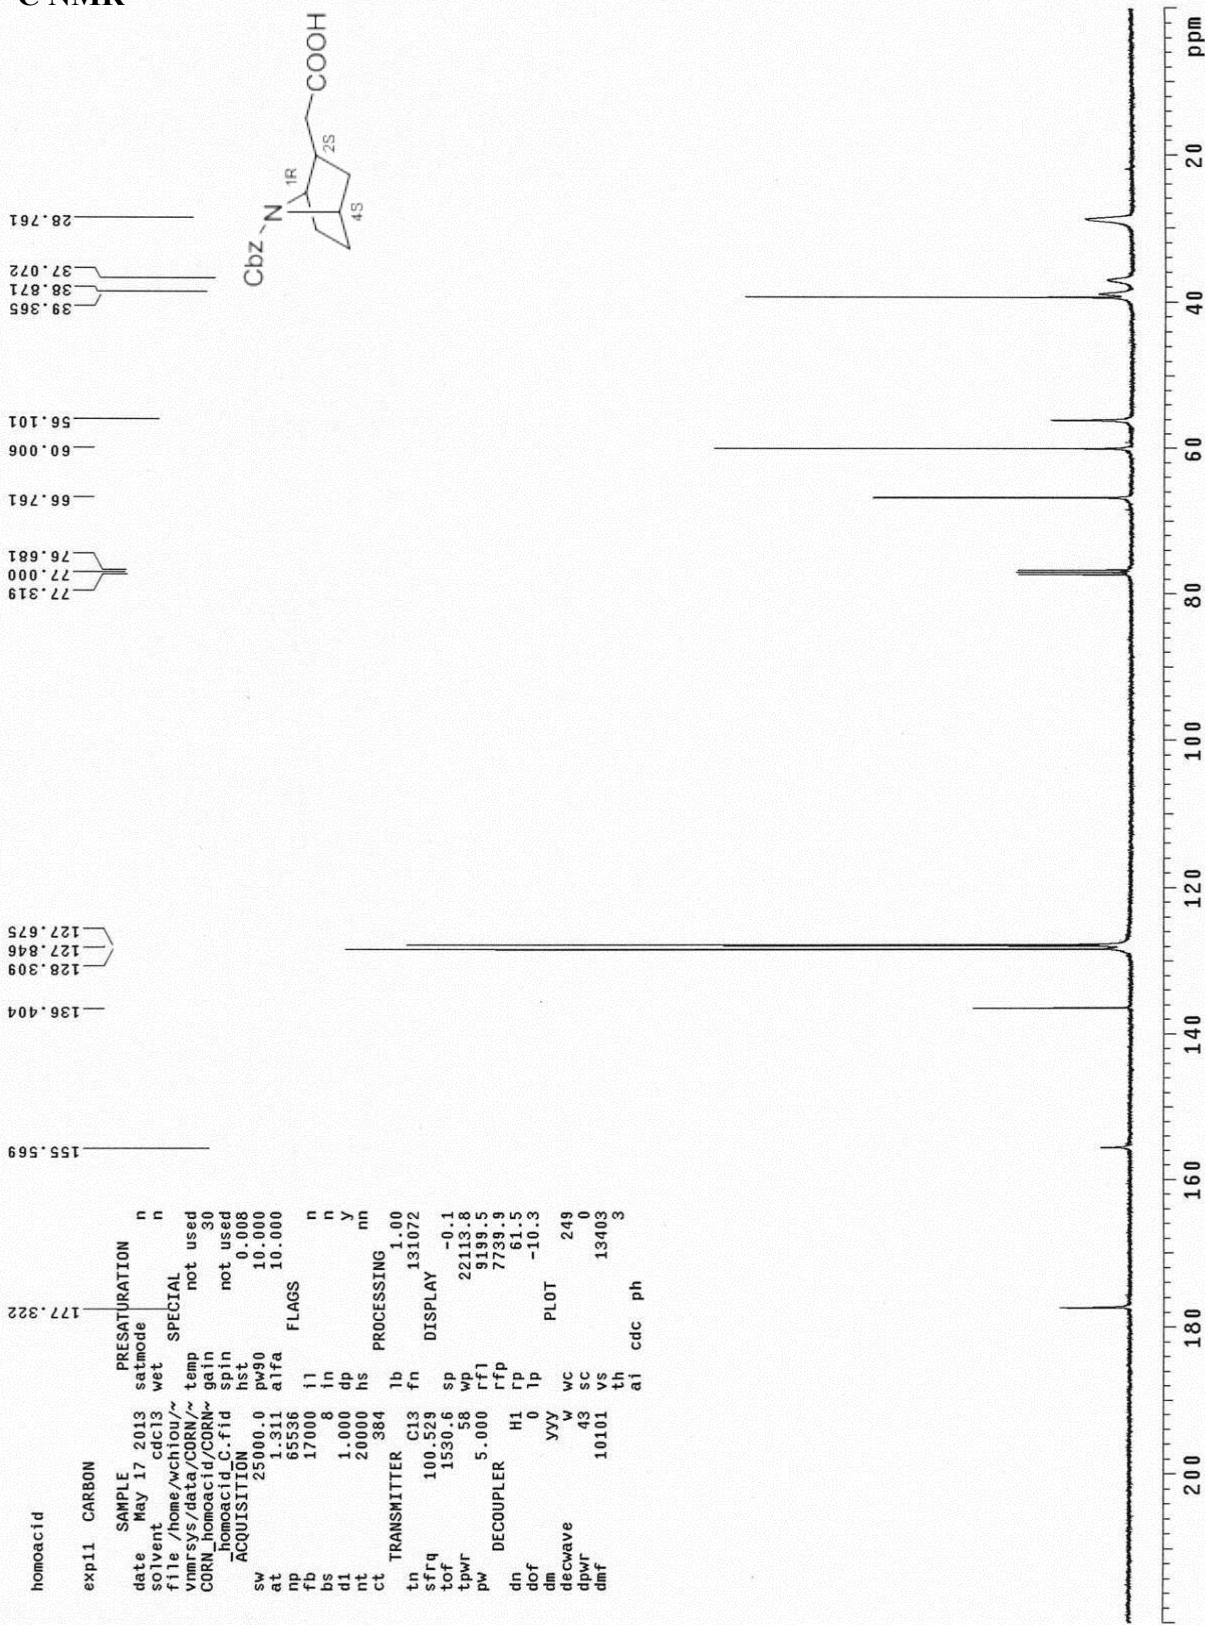

10 <sup>1</sup>H NMR

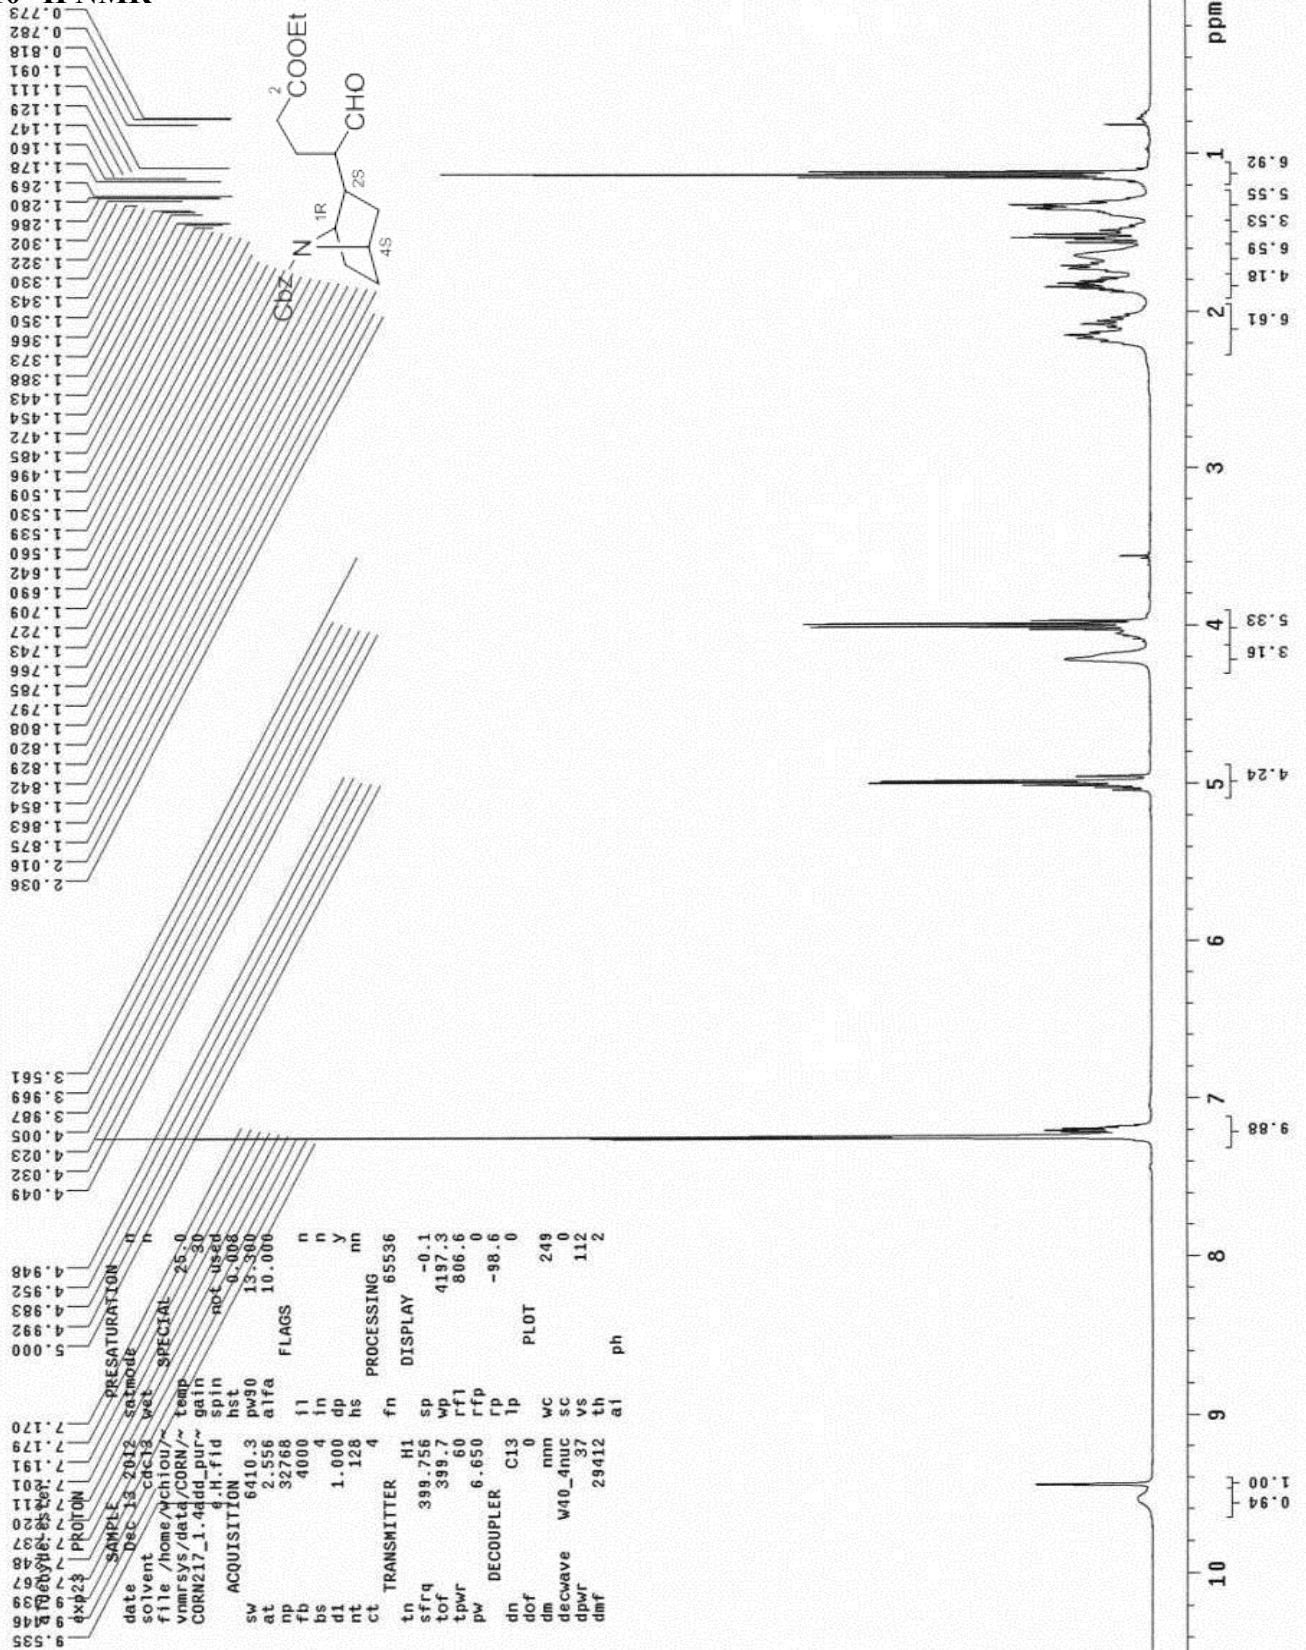

10<sup>13</sup>C NMR

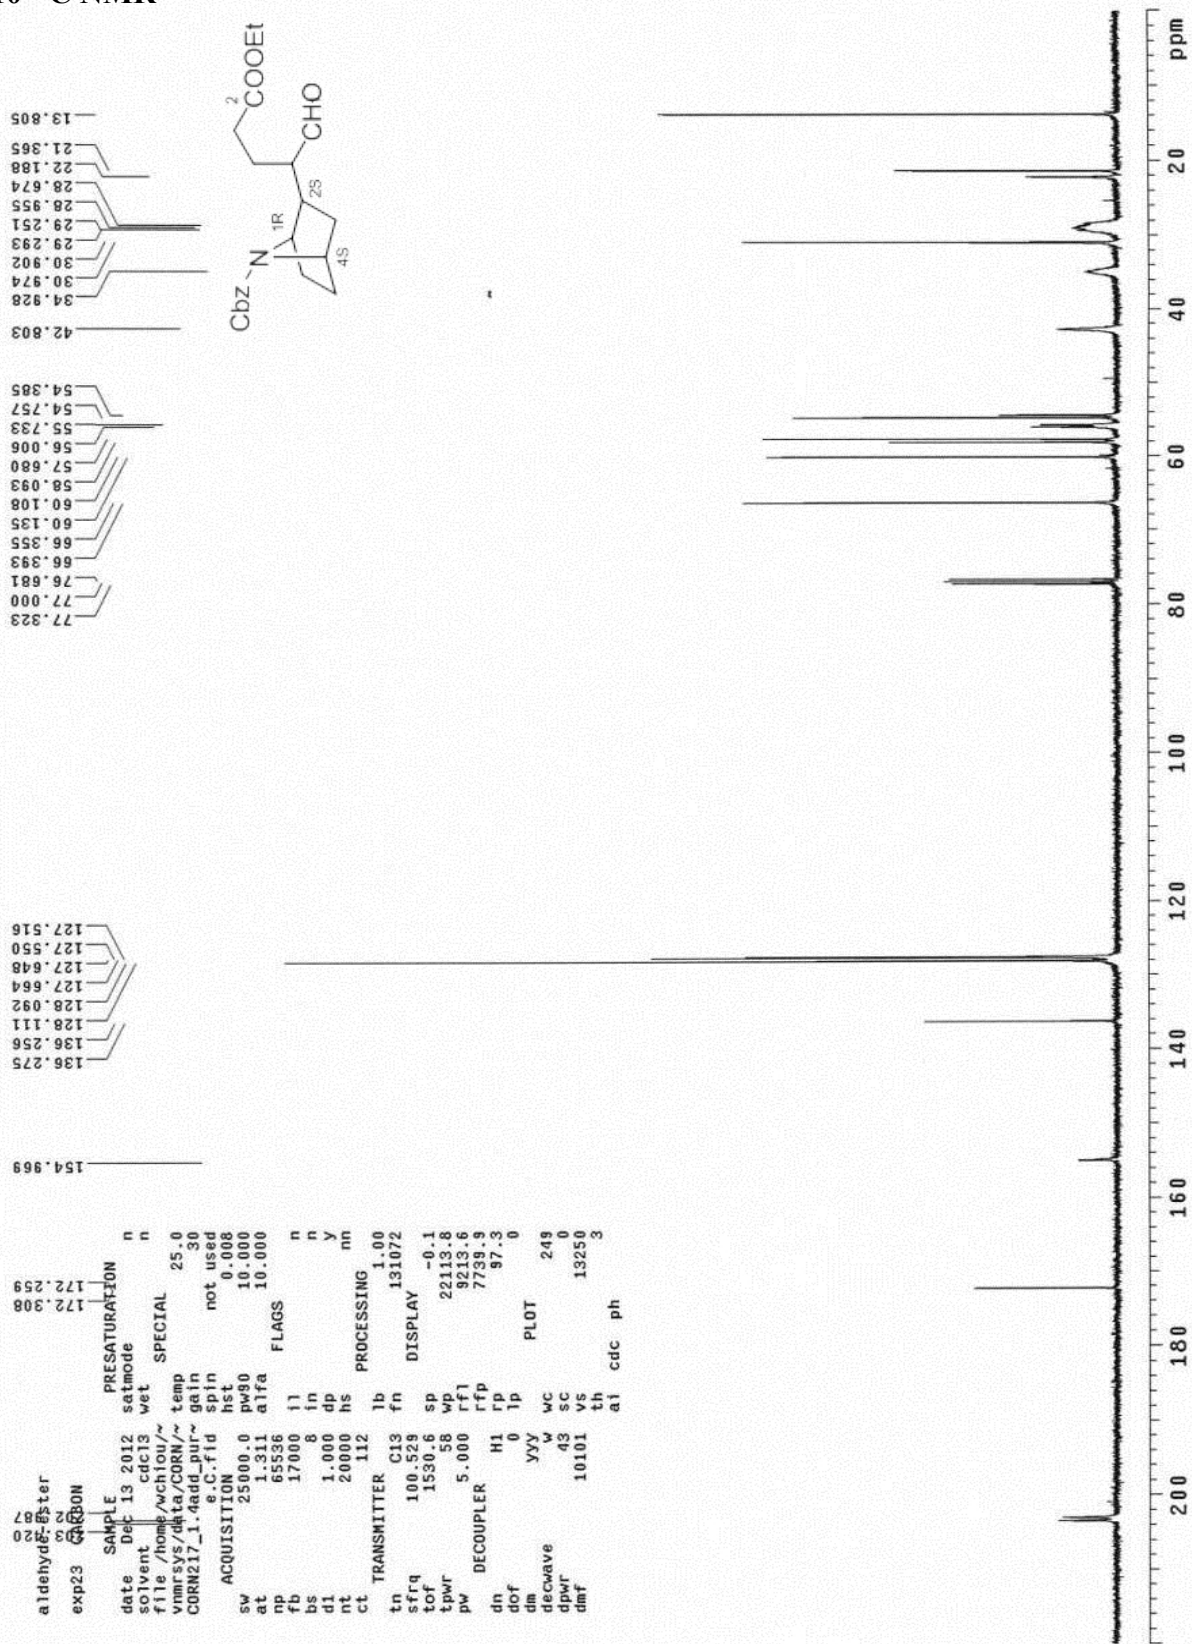

11 <sup>1</sup>H NMR

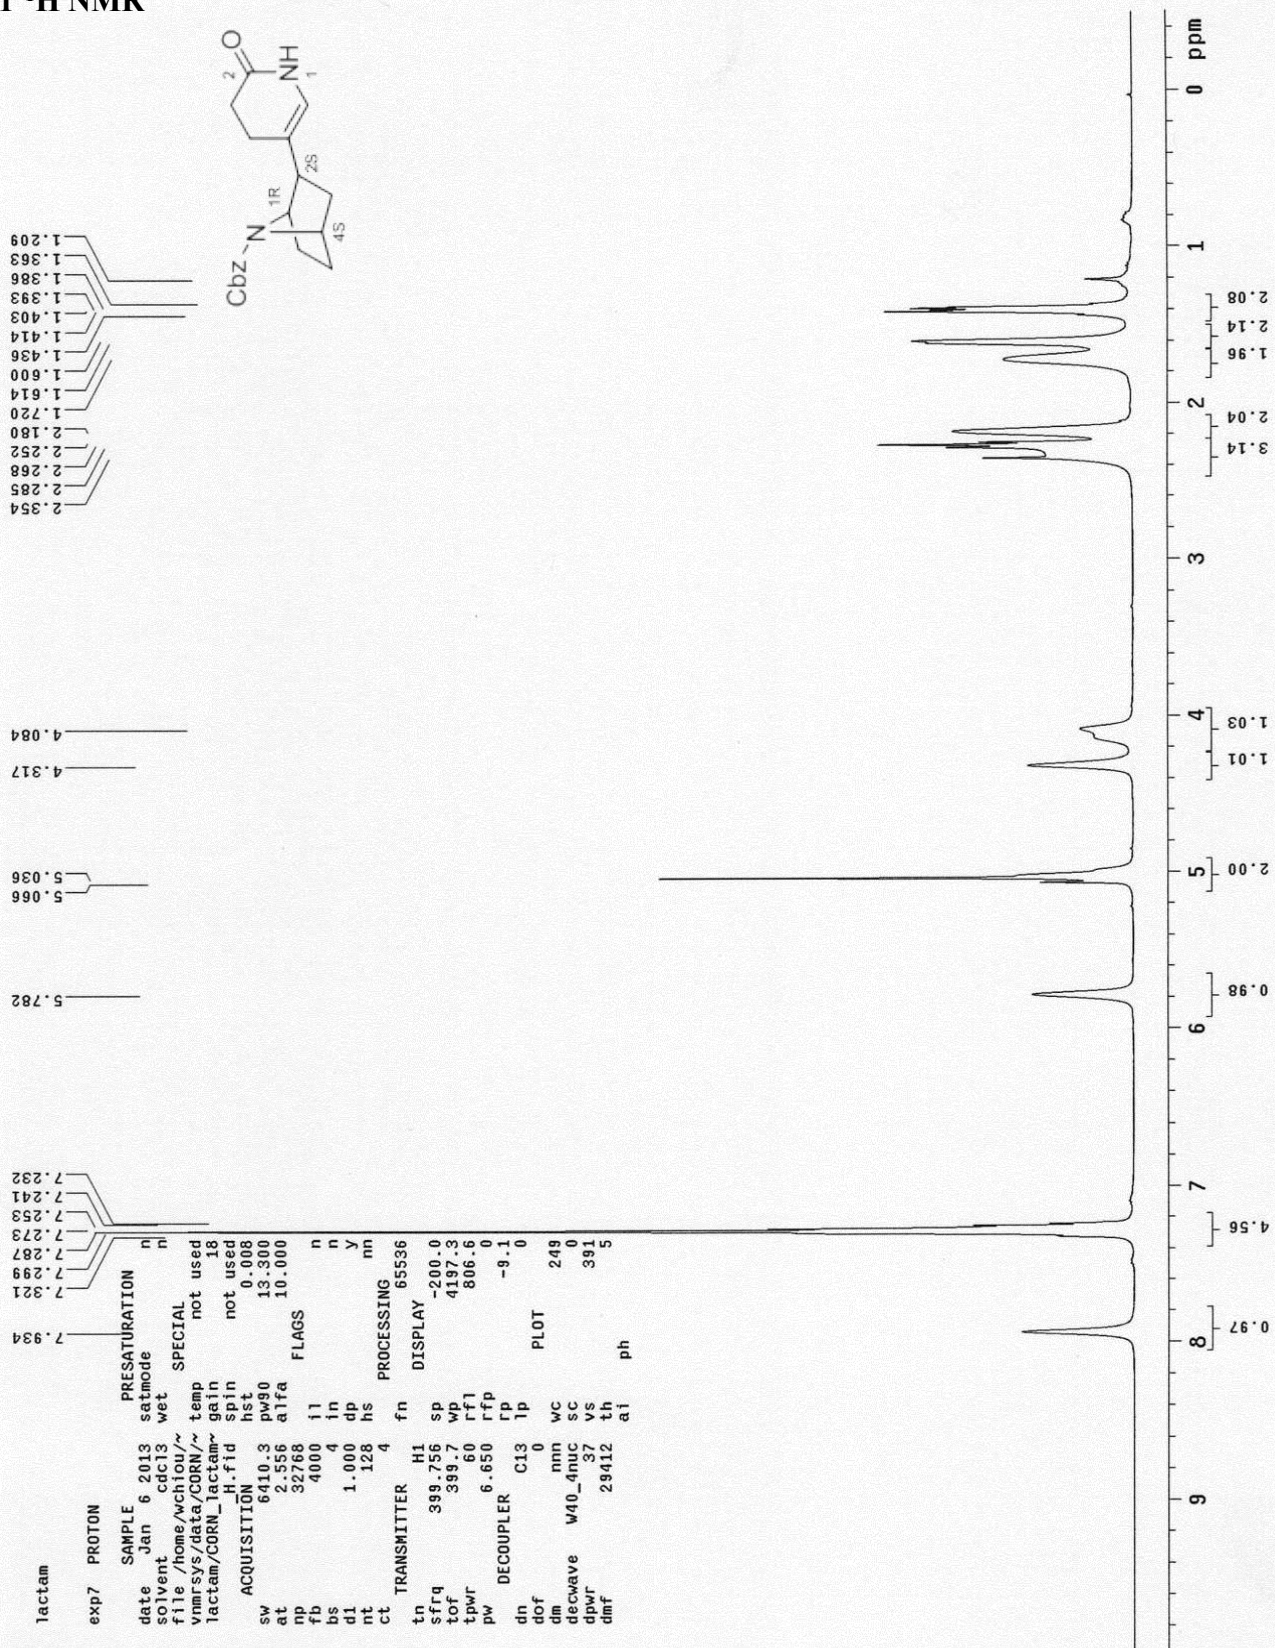

11 <sup>13</sup>C NMR

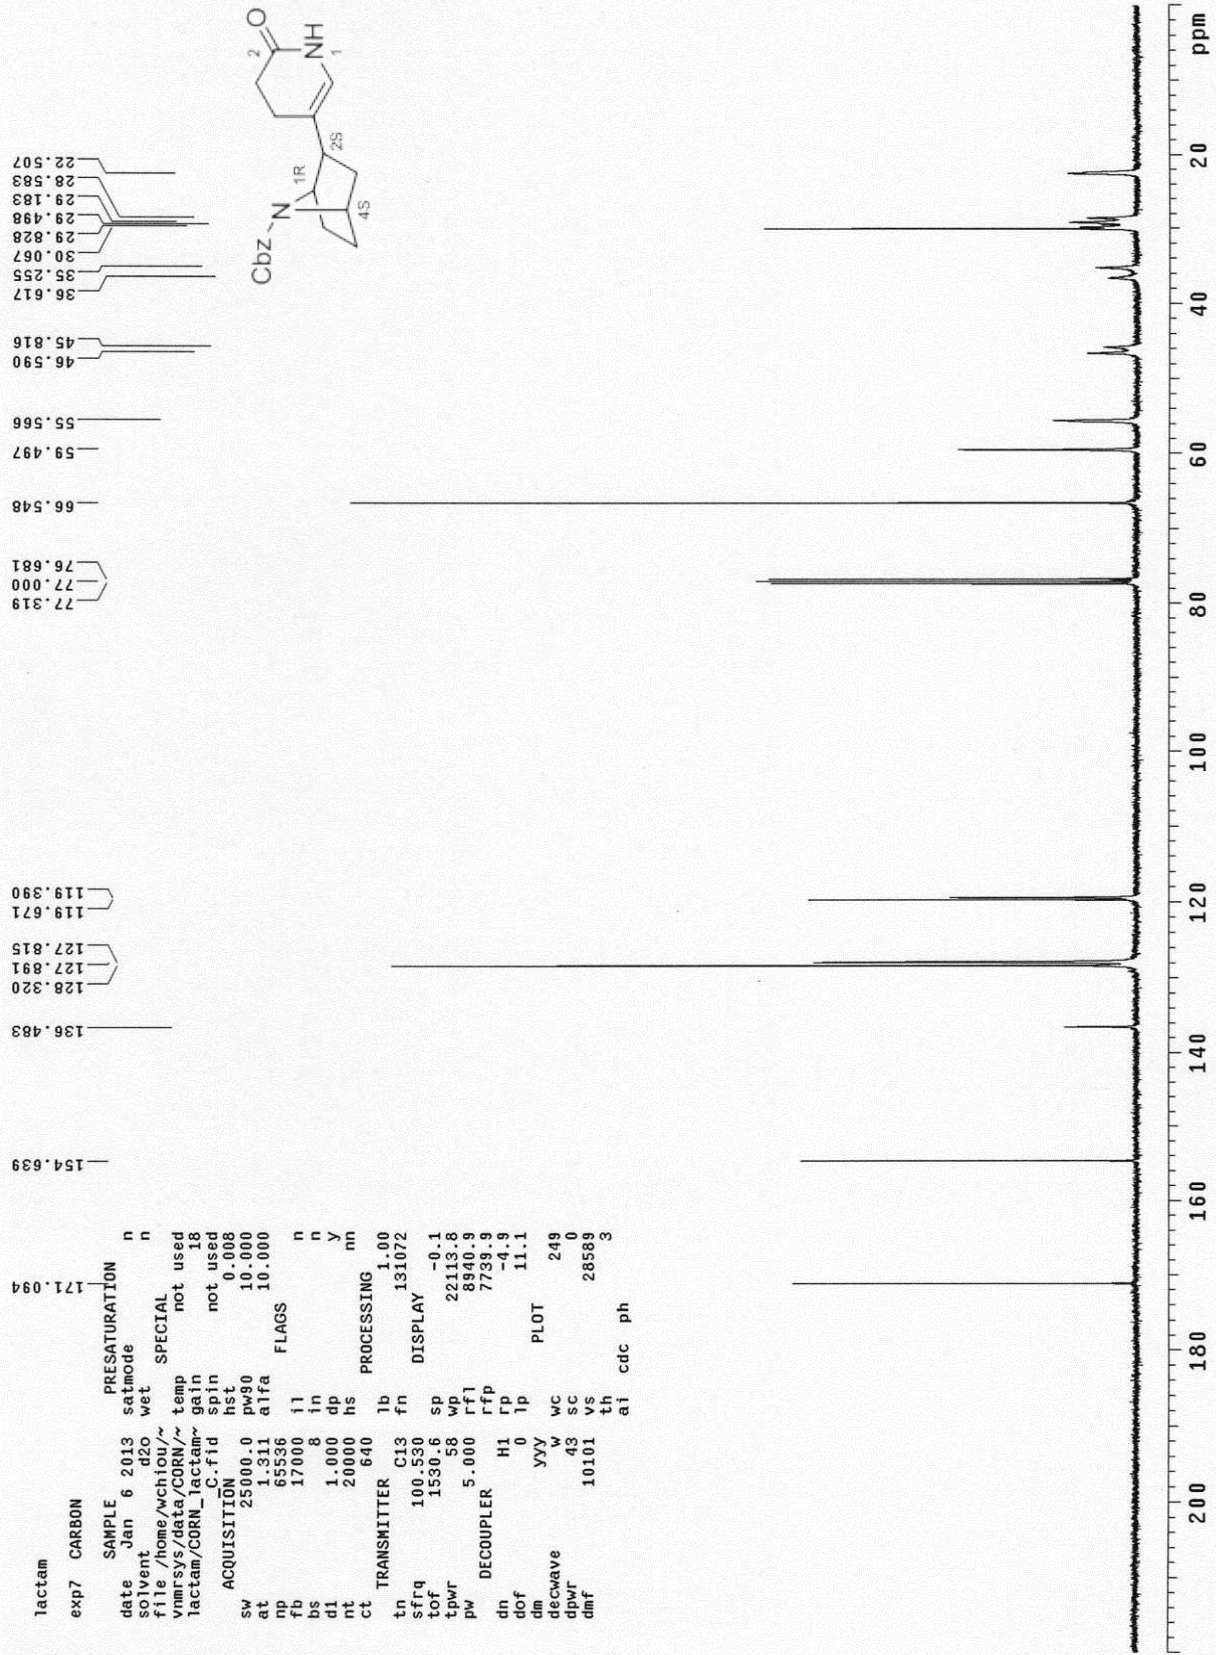

12 <sup>1</sup>H NMR

2.627  
2.615  
2.606  
2.595  
1.904  
1.874  
1.851  
1.716  
1.685  
1.531  
1.510  
1.486  
1.473  
1.451  
1.431

4.139  
4.385  
5.061

6.450  
6.473  
7.177  
7.291  
7.392  
7.416

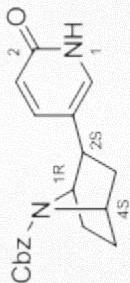

```

pyridinone
exp21 PROTON
SAMPLE
date Jan 15 2013 satmode n
solvent cdc13 wet SPECIAL n
file /home/wchiou/~ temp not used
vnmrsvs/data/CORN/~ gain 30
pyridinone/CORN_by not used
ridinone_H.ftid spin 0.008
ACQUISITION hst 13.300
sw 6410.3 pw90 10.000
at 2.556 aifa 10.000
np 32768
fb 4000
bs 4
d1 1.000 dp in n
nt 128 hs
ct TRANSMITTER 36 fn 65536
tn H1 DISPLAY 199.8
sfrq 399.756 sp 5386.5
tof 399.7 wp 806.6
tpwr 60 rfi 0
pw 6.650 rfp -12.3
dn DECOUPLER C13 lp 0
dof 0 PLOT
dm mnn WC 249
decwave W40_4nuc SC 0
dpwr 37 vs 293
dmf 29412 th ai 9

```

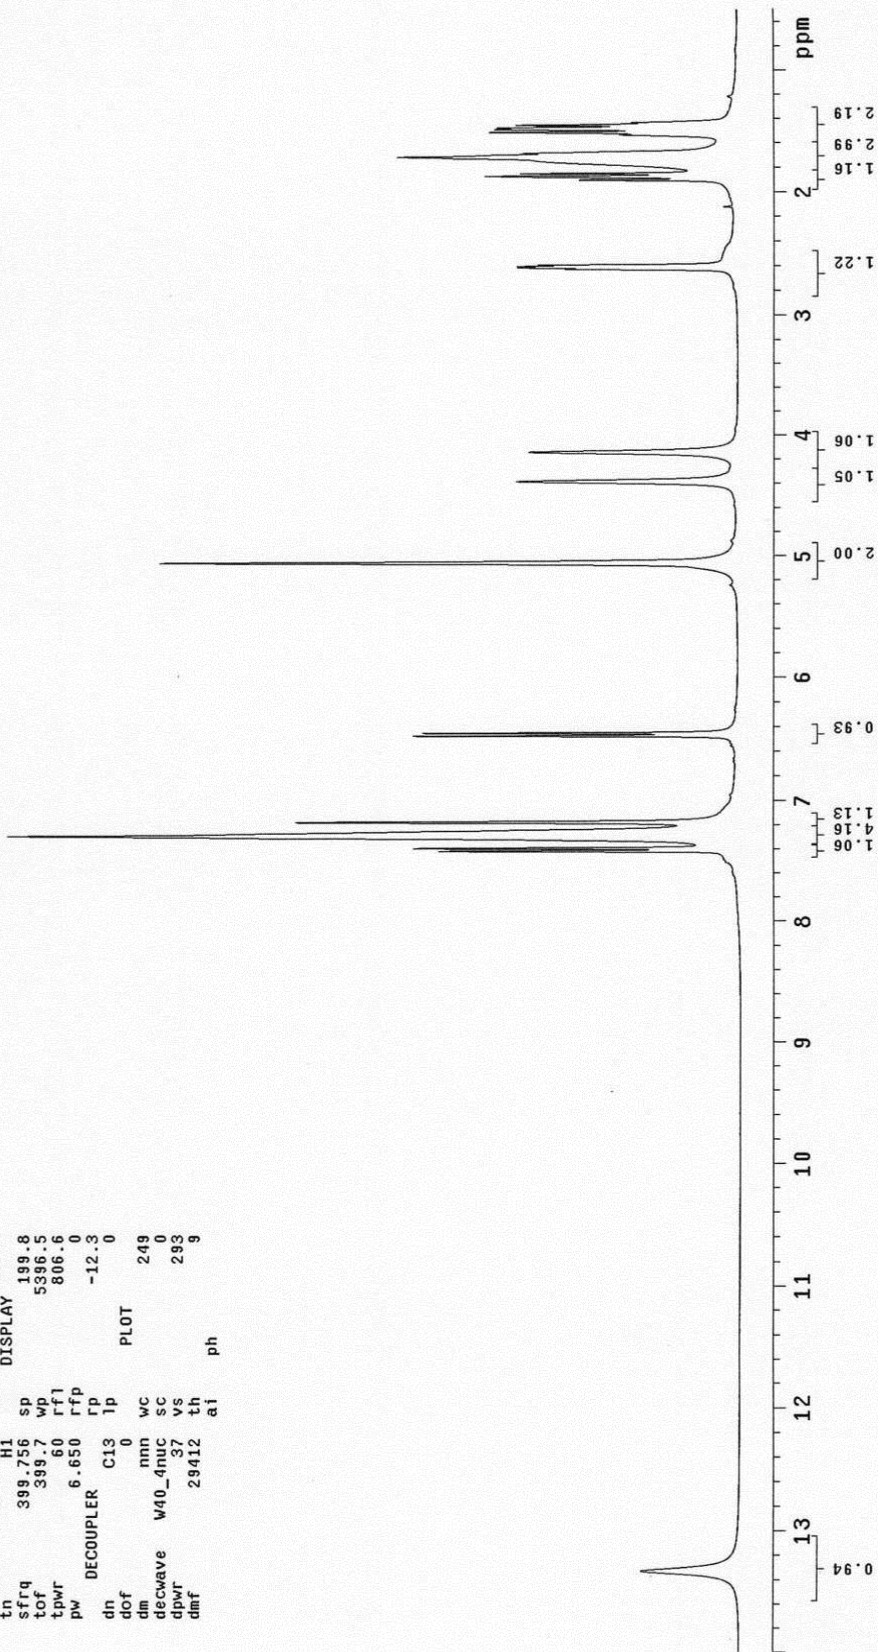

12 <sup>13</sup>C NMR

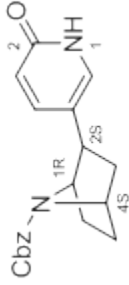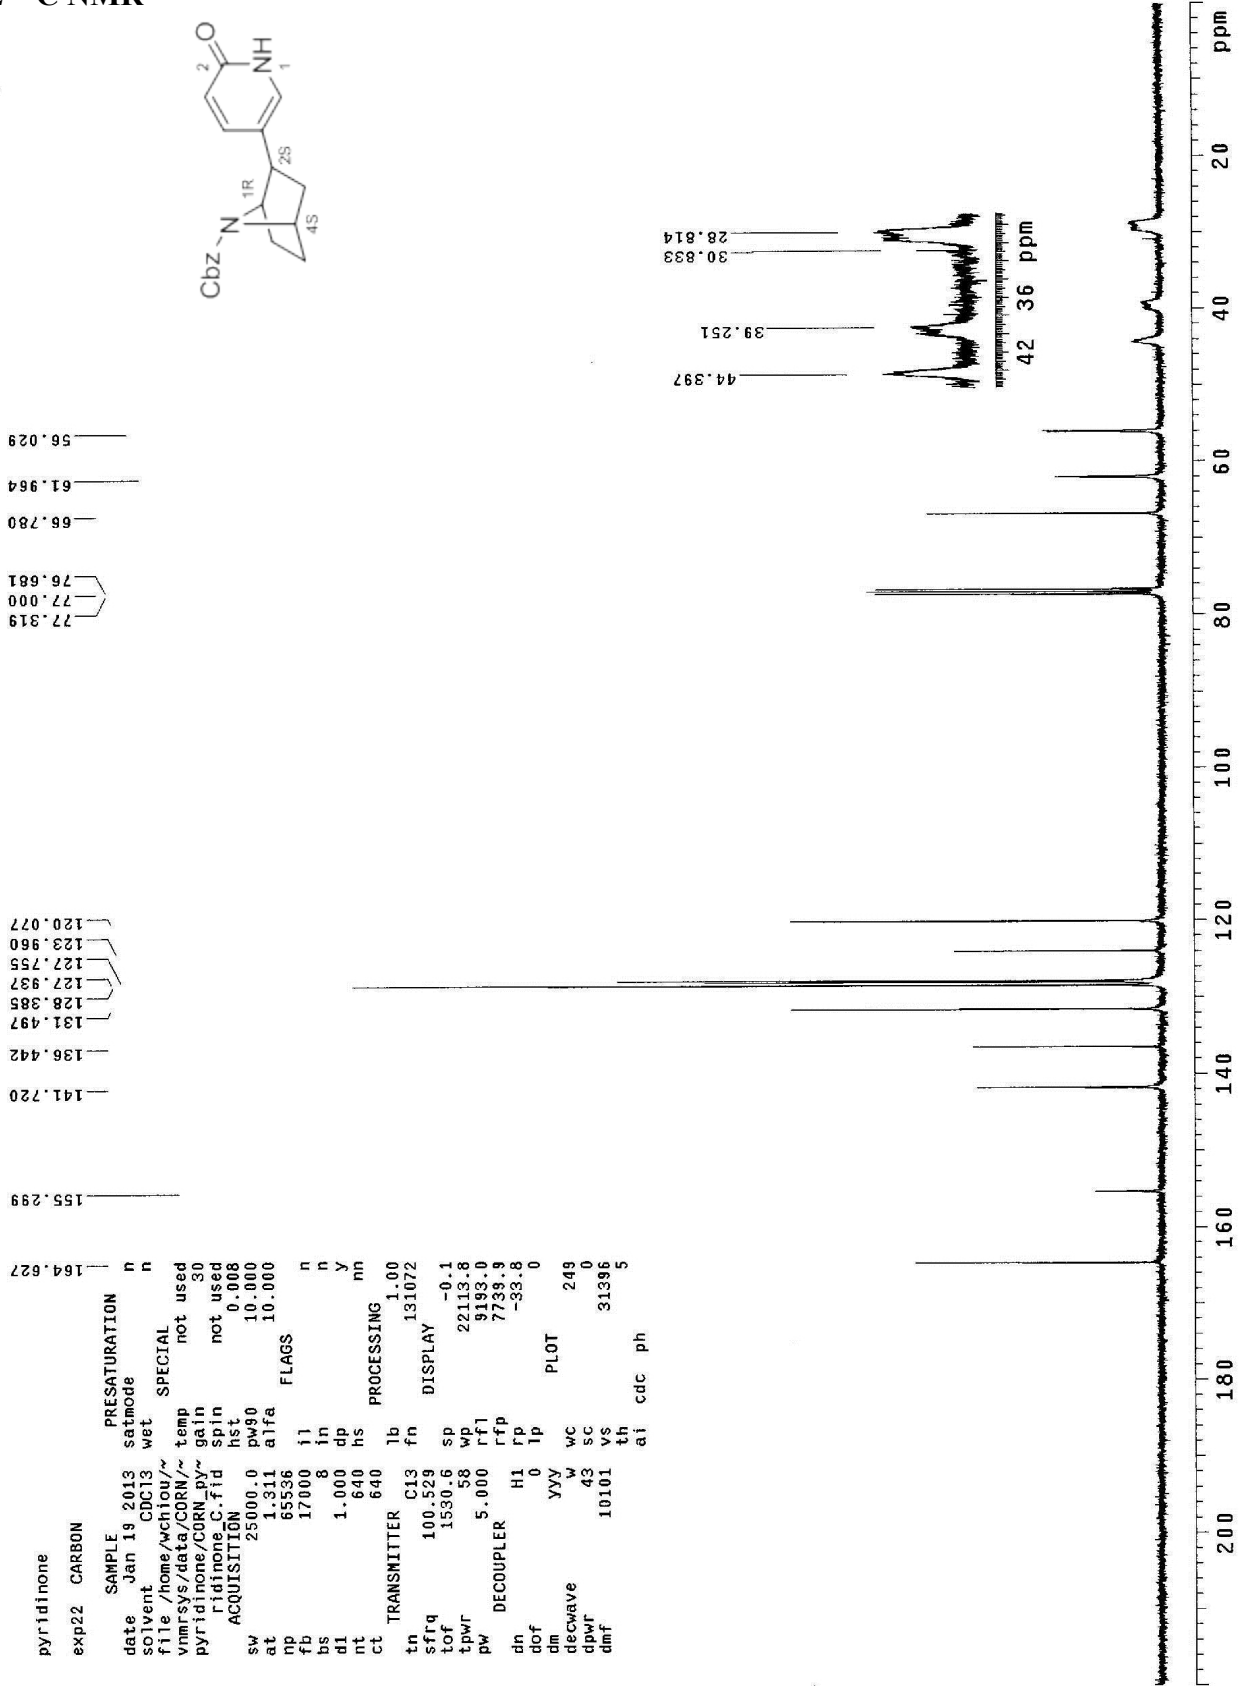

```

pyridinone
exp22 CARBON
SAMPLE PRESATURATION
date Jan 19 2013 satmode n
solvent CDCl3 wet n
file /home/wchiou/~ SPECIAL
vnmrSYS/data/CORN/~ temp not used
pyridinone/CORN_py gain 30
ridinone_C_fid spin not used
ACQUISITION hst 0.008
sw 25000.0 pw90 10.000
at 1.311 alfa 10.000
np 65536
fb 17000 fl n
bs 8 in n
dl 1.000 dp y
nt 640 hs PROCESSING mn
ct 640 lb 1.00
TRANSMITTER C13 fn 131072
tn 100.529 sfrq
tof 1530.6 sp -0.1
tpwr 58 wd 22113.8
pw 5.000 rfl 9193.0
DECOUPLER H1 rp 7739.9
dn 0 lp -33.8
dof 0
dm YYY PLOT
decwave w WC 249
dppwr 43 SC 0
dmf 10101 vs 31396
ai cdc ph 5
  
```

# 13 H NMR

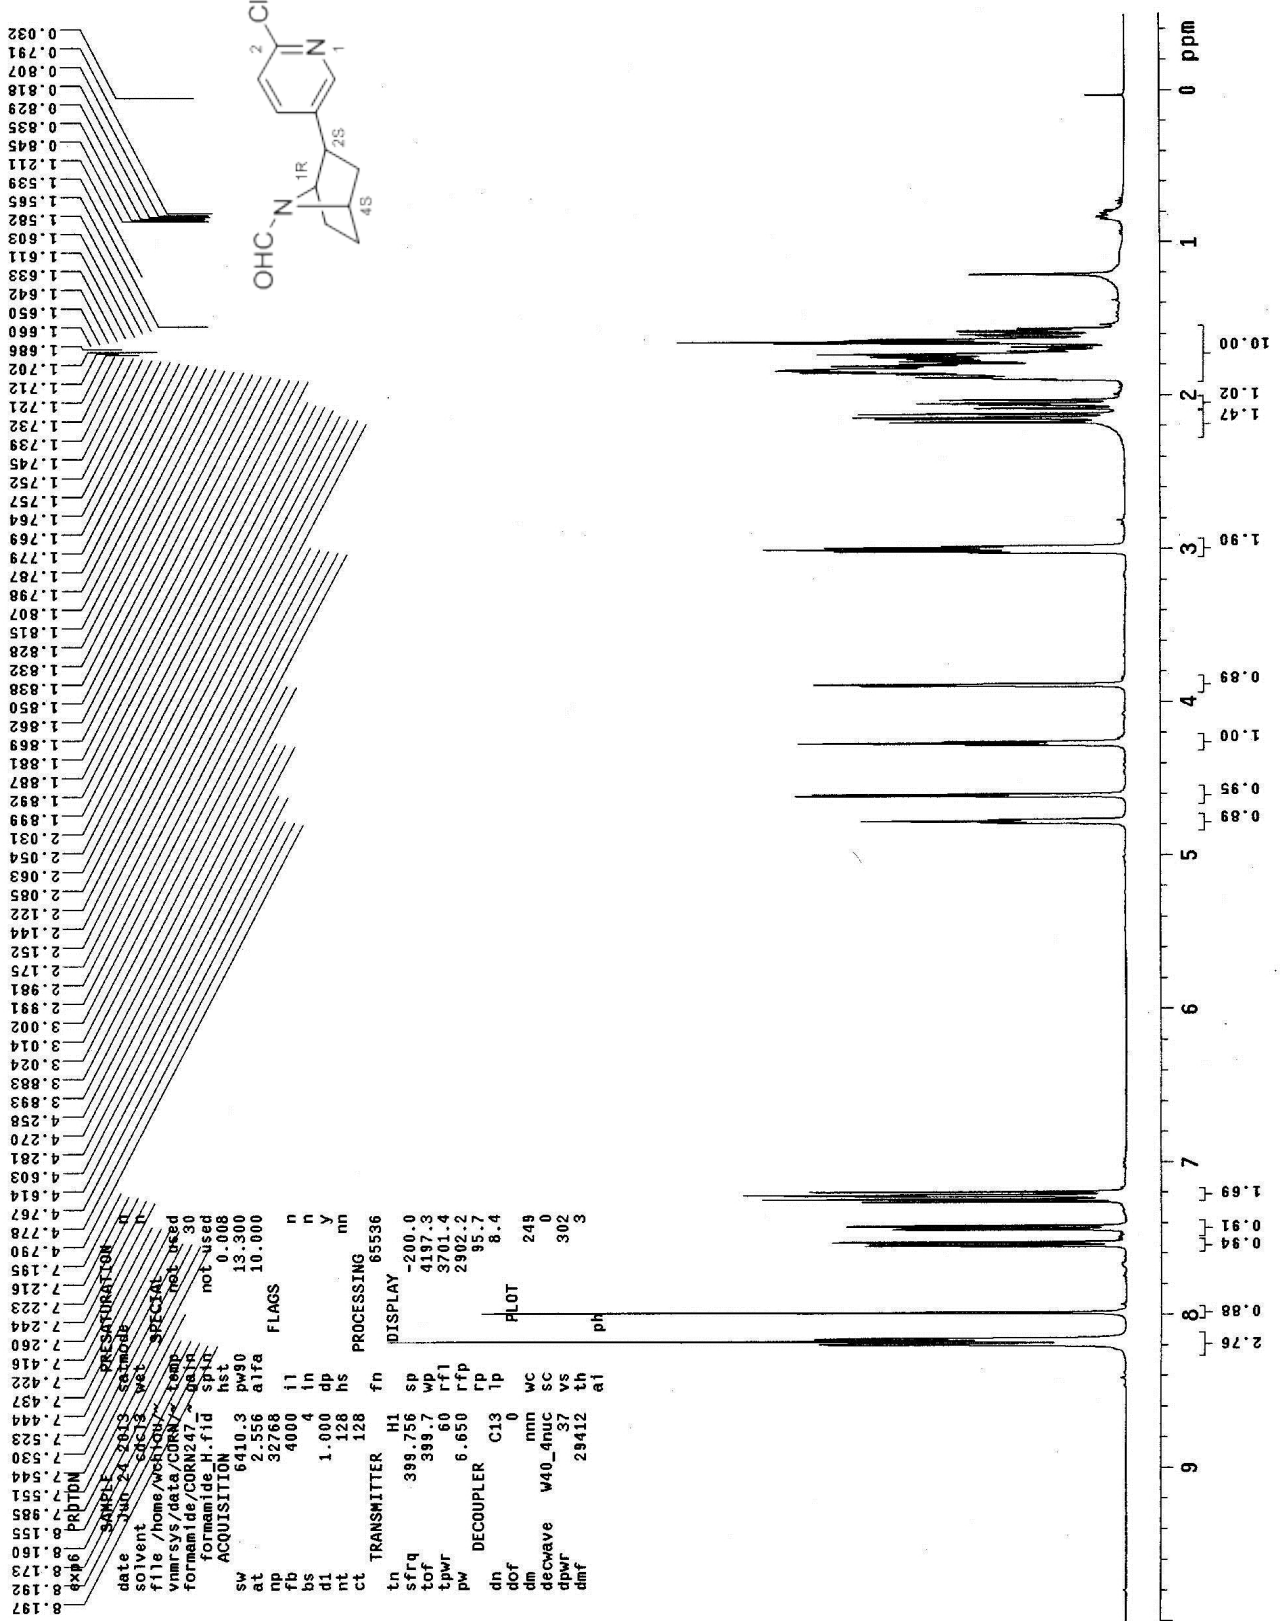



13 <sup>13</sup>C NMR

61.808  
56.598  
55.311  
51.649  
44.826  
44.059  
41.179  
38.720  
30.723  
29.775  
29.099  
28.238

77.319  
77.000  
76.681

124.244  
124.958

136.407  
136.760  
138.533  
138.954  
148.404  
148.692  
149.440  
149.770  
157.235  
157.553

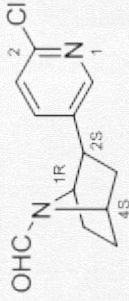

```

formamide
exp5 CARBON
SAMPLE PRESATURATION
date Feb 22 2013 satmode n
solvent cdc13 wet n
file /home/vchiou/~ SPECIAL not used
vnmrsys/data/CORN/~ temp not used
CORN247f1_POC13_DM~ gain 30
F/CORN247f1_POC13~ spin not used
C.fid hst 0.008
ACQUISITION pw90 10.000
sw 25000.0 alfa 10.000
at 1.311 i1
np 65536 in
fb 17000 in n
bs 8 dp n
d1 1.000 hs
nt 512 lb
ct 512 fn 131072
TRANSMITTER C13 DISPLAY -0.1
tn 100.529 sp 22113.8
sftq 1530.6 wp 9193.4
tof 58 rfl 7739.9
tpwr 5.000 rfp 164.6
pw DECOUPLER H1 lp
dn dof 0
dim 0 YVY WC 249
dm dechve W SC 0
dipwr 43 VS 50641
dmf 10101 th ai cdc ph 9
  
```

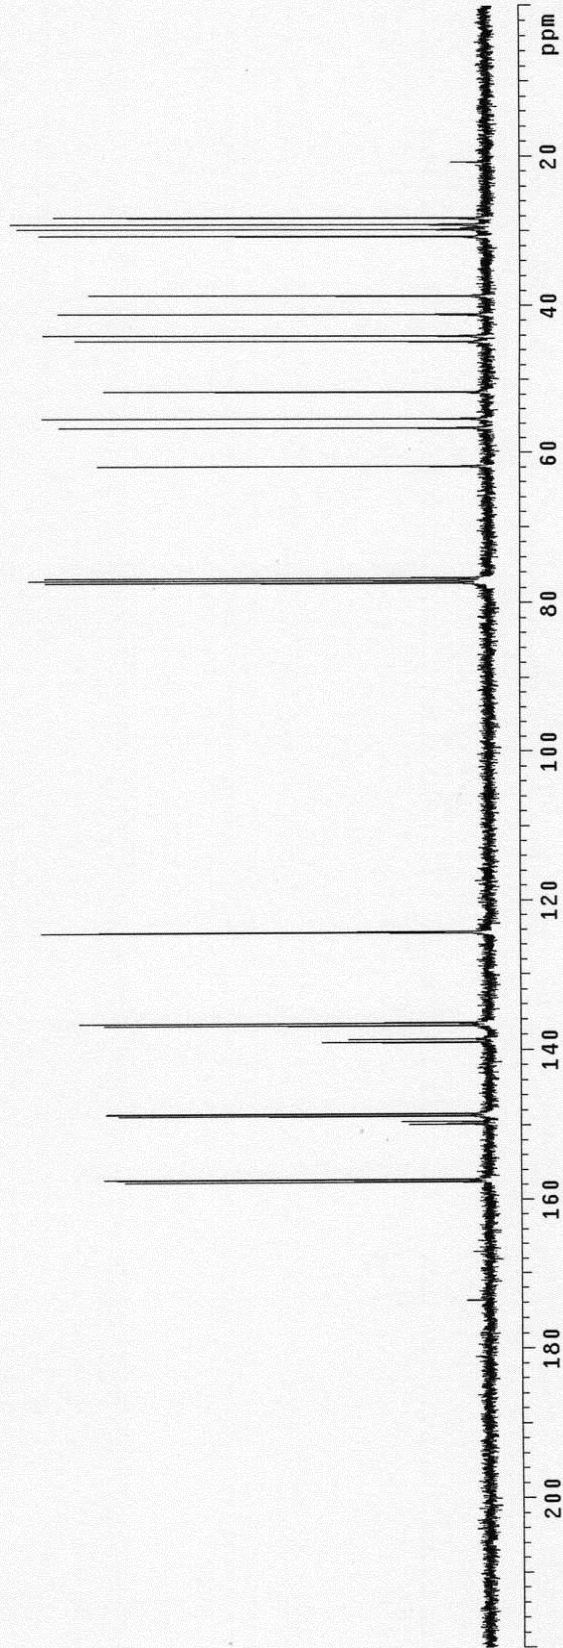

14 <sup>1</sup>H NMR

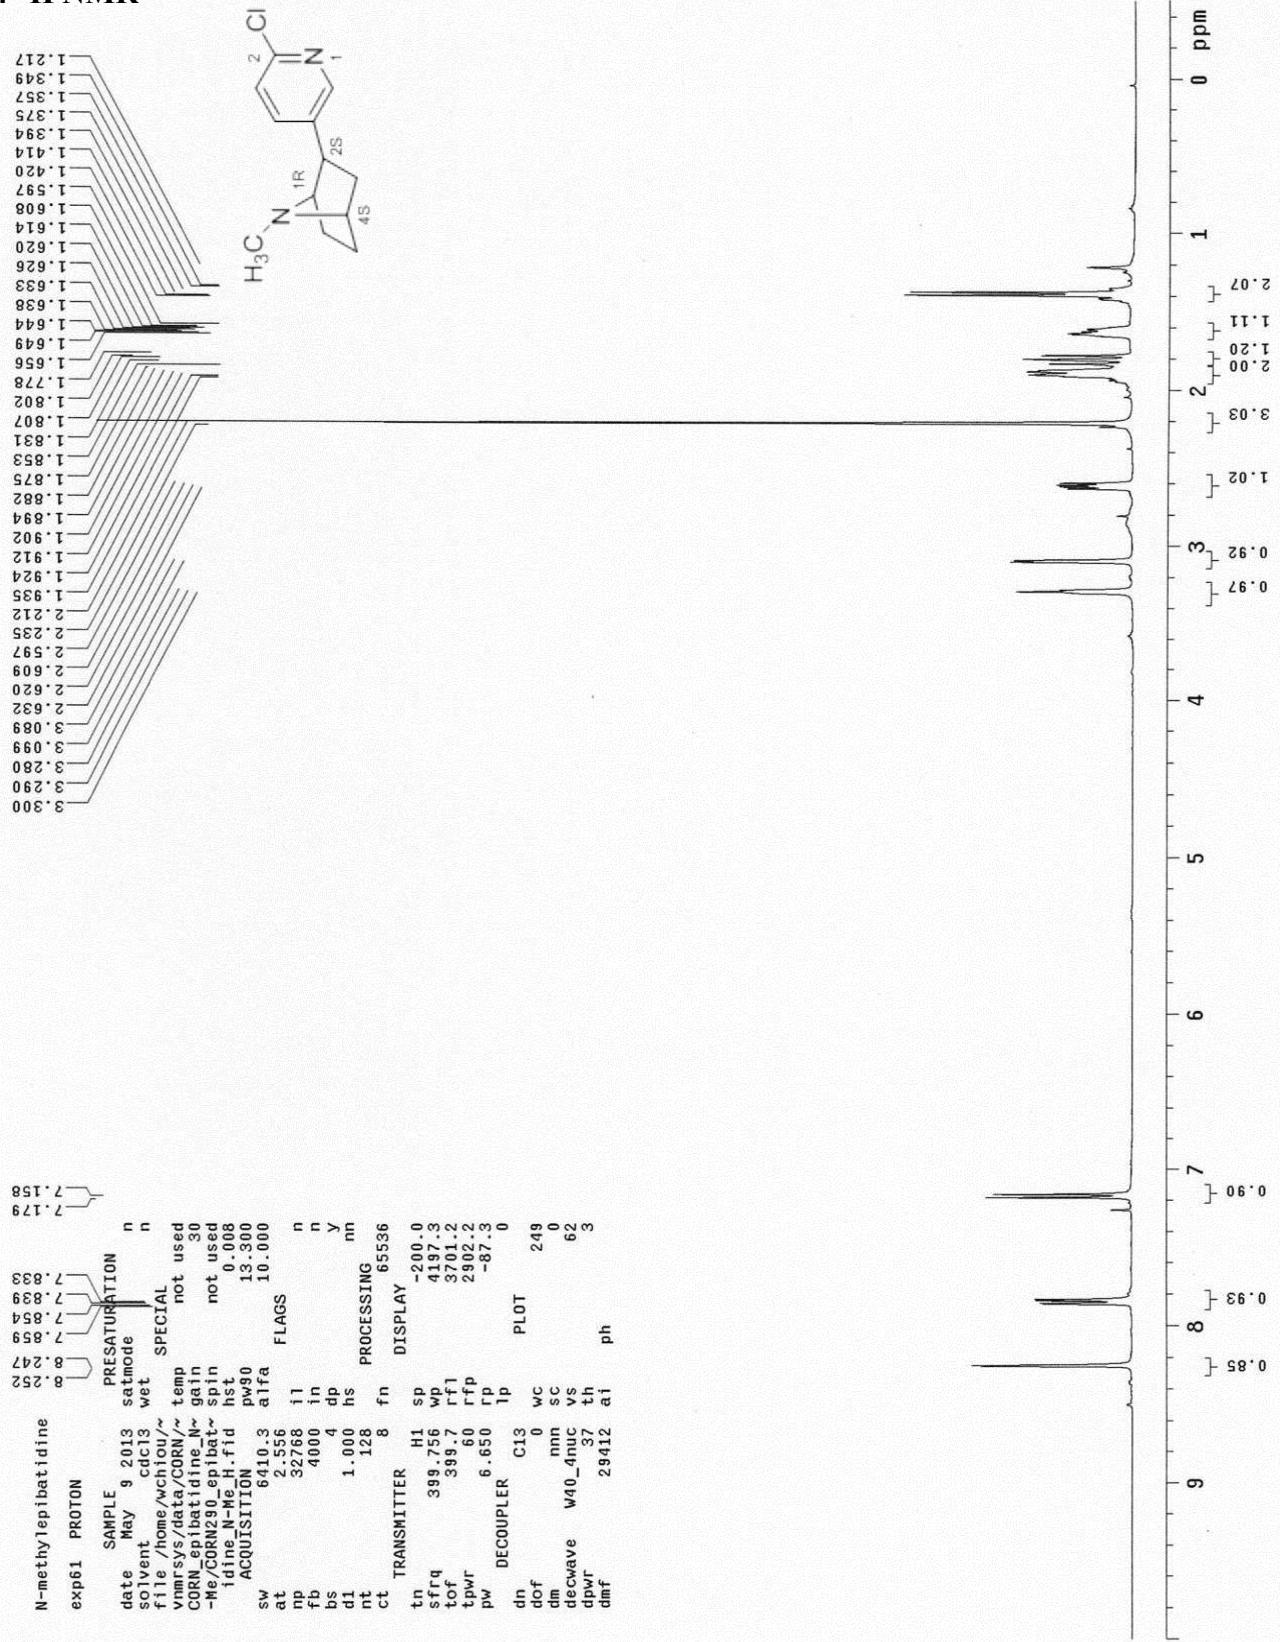

14 <sup>13</sup>C NMR

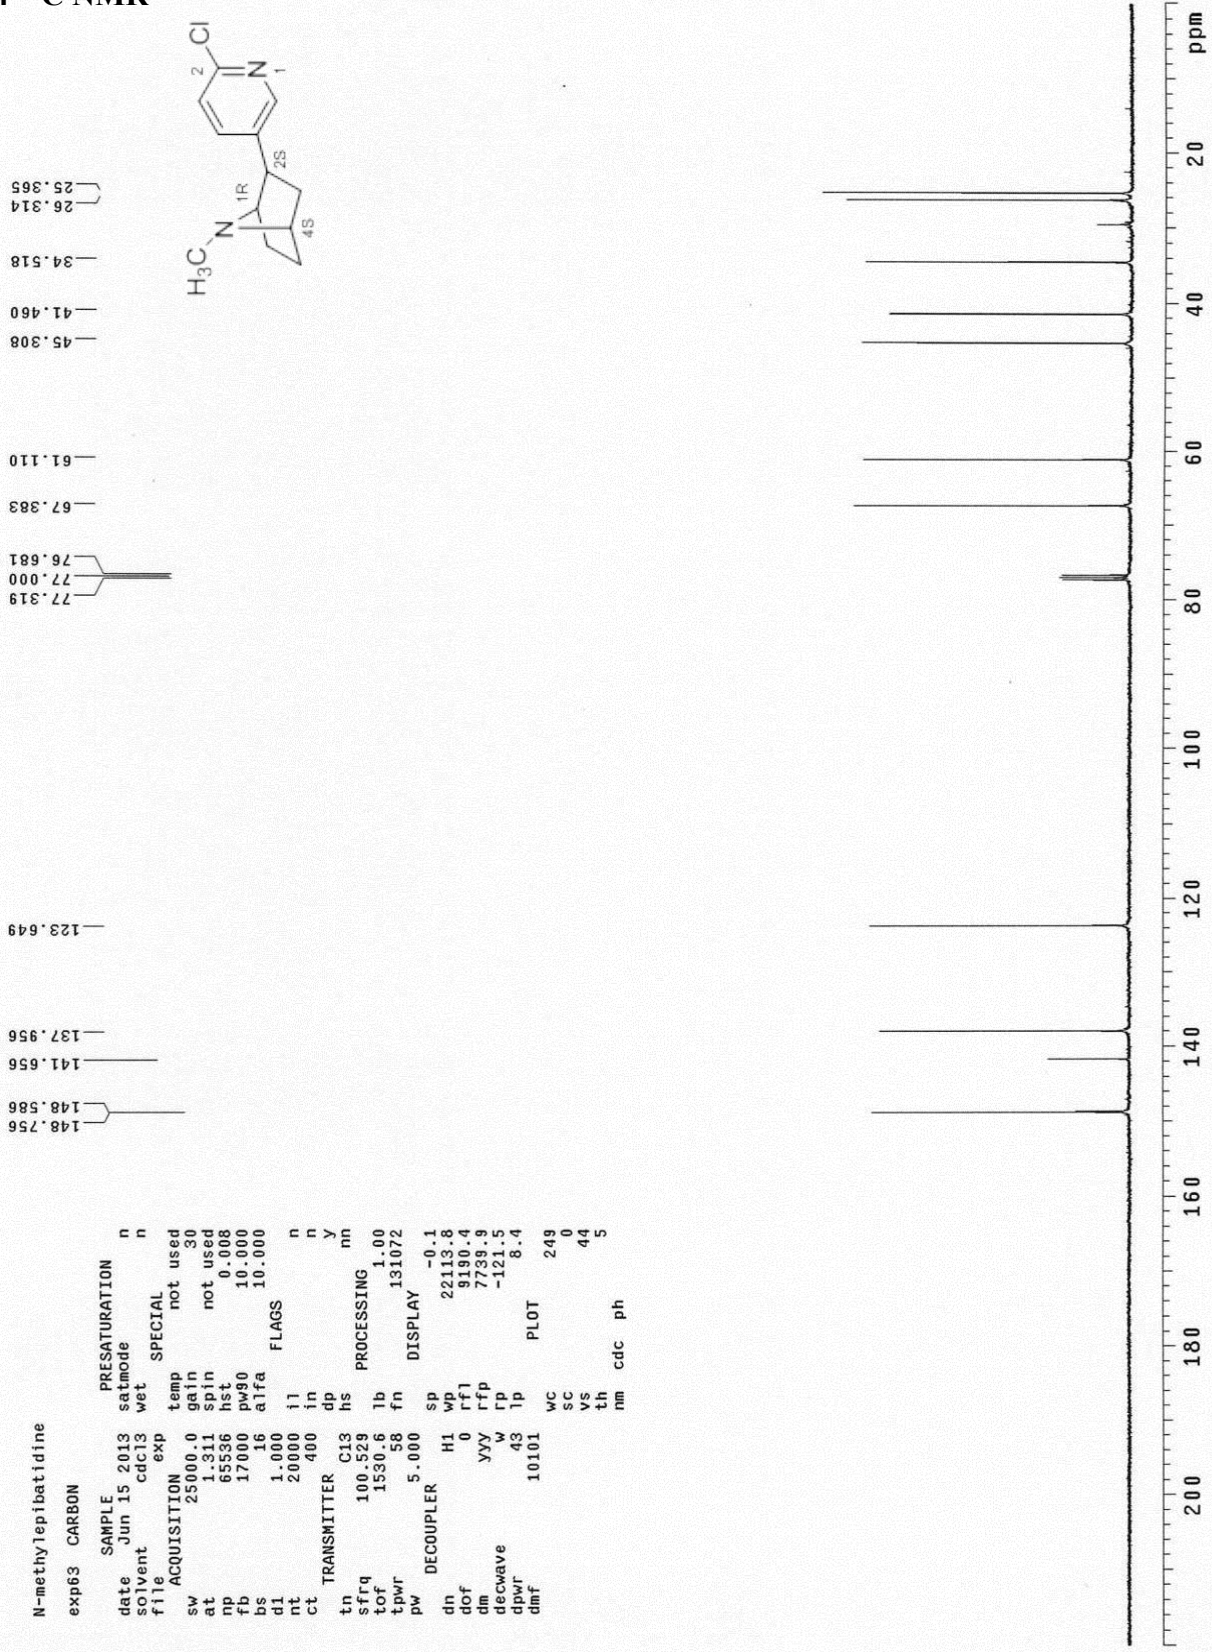

1 H NMR

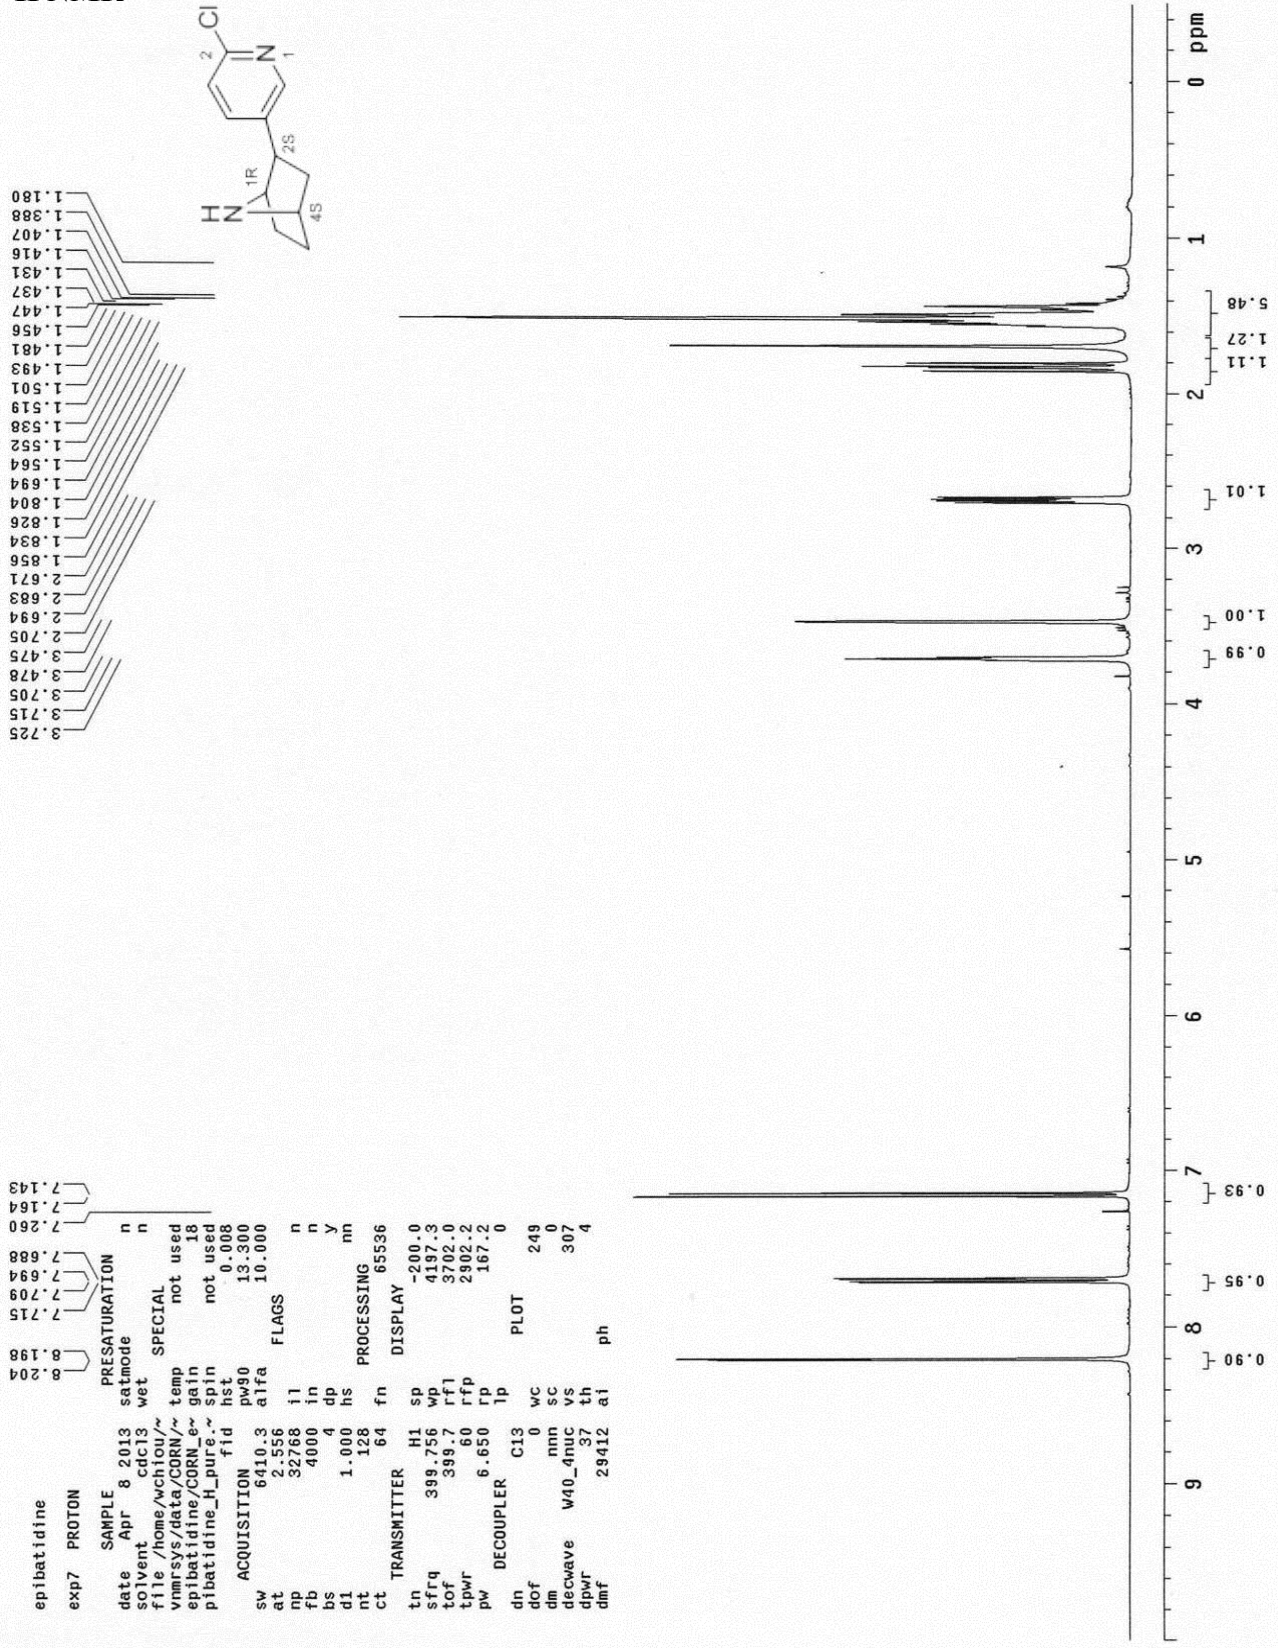

1 <sup>13</sup>C NMR

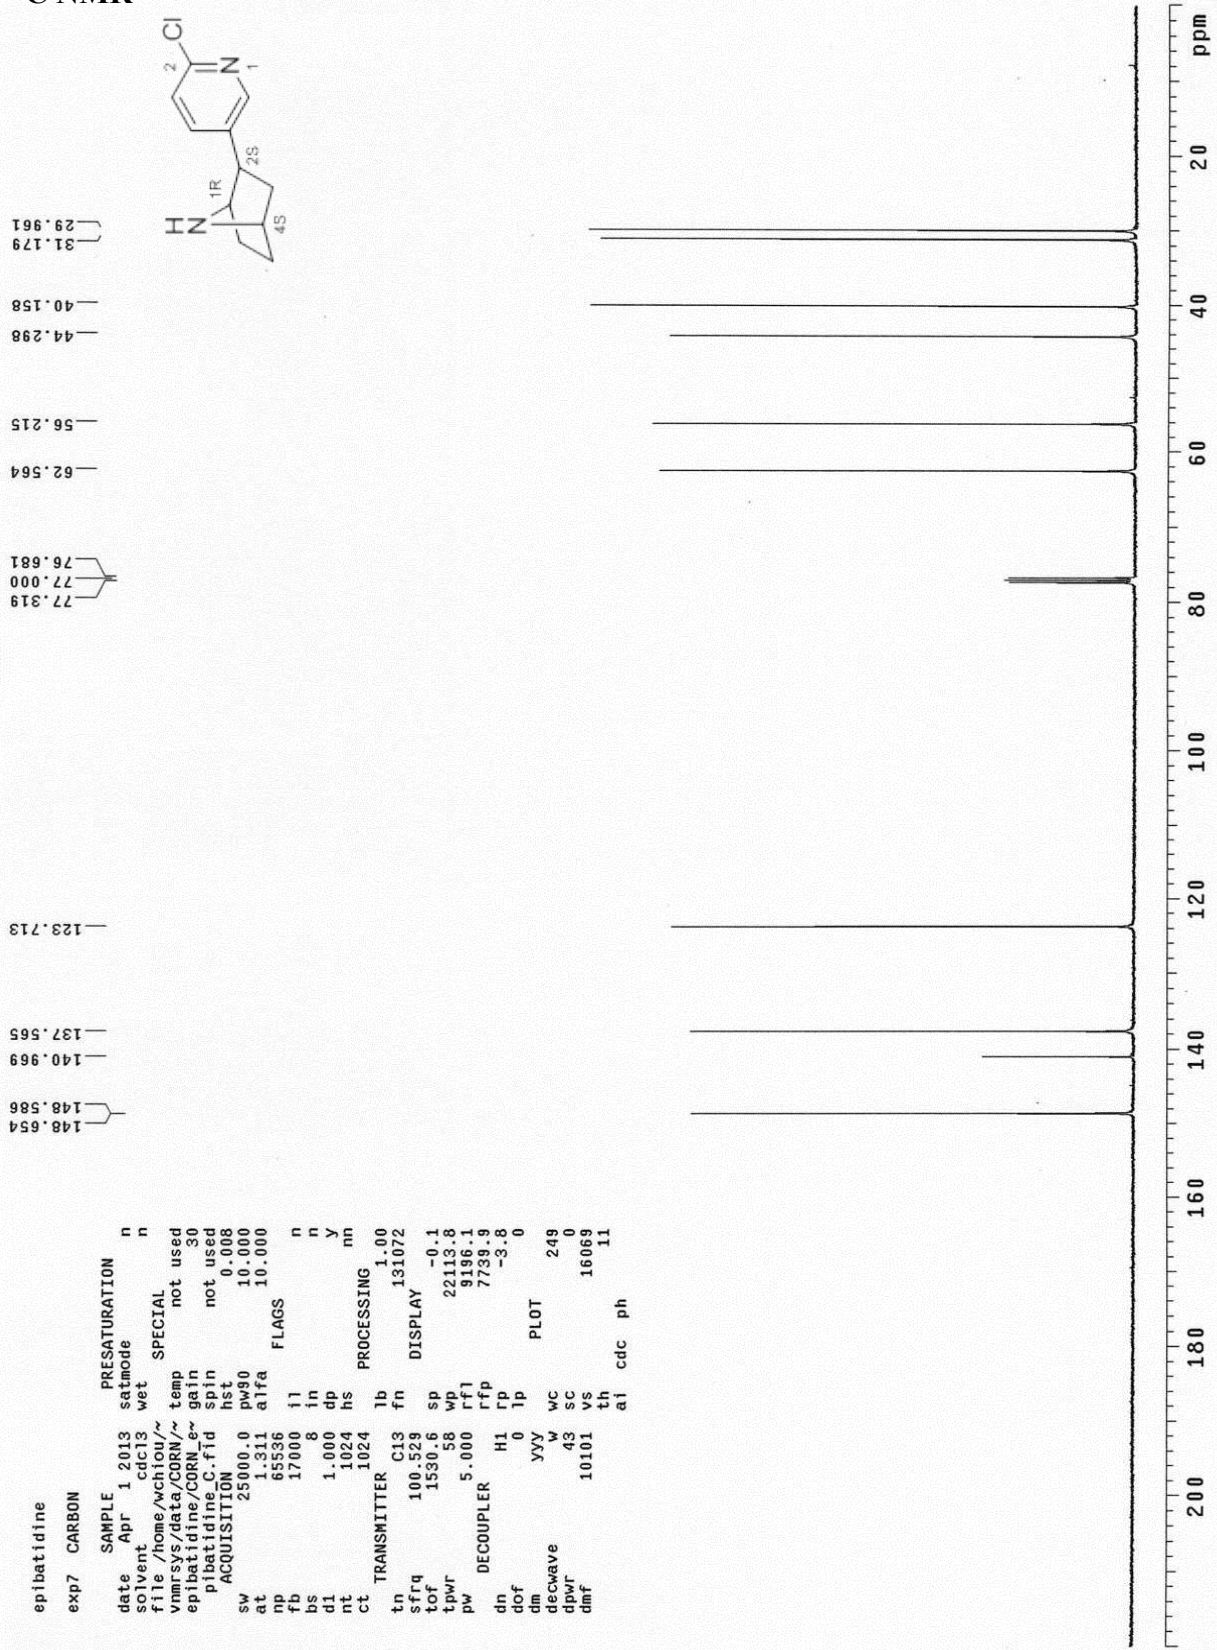

Supplement: c4ra00770k1.pdf [file c4ra00770k1.pdf]
